# Supplementary material
Source: HighWire-hosted journal article supplement (https://www.cmajopen.ca/highwire/filestream/80962/field_highwire_adjunct_files/2/2016-0084-3-at.pdf)
Supplement: 2016-0084-3-at.pdf [file 2016-0084-3-at.pdf]

## Appendix 3 (as supplied by the authors): Excluded articles by level and question

### Level 1: Title and Abstract Screening

#### **1. Is it or does it include an original validation study of a blood-based qualitative immunoassay for hepatitis C? (Exclude rapid/point-of-care tests, geno/serotyping tests, tests applied to dried blood or saliva.)**

**A Alberti, G Morsica, L Chemello, D Cavalletto, F Noventa, P Pontisso, A Ruol** (1992//). Hepatitis C viraemia and liver disease in symptom-free individuals with anti-HCV. *Lancet (London, England)*, 340(8821), 697

**A Antico, S Platzgummer, D Bassetti, N Bizzaro, R Tozzoli, D Villalta, Study Group on Autoimmune Diseases of the Italian Society of Laboratory Medicine (SIMeL)** (2010//). Diagnosing systemic lupus erythematosus: new-generation immunoassays for measurement of anti-dsDNA antibodies are an effective alternative to the Farr technique and the Crithidia luciliae immunofluorescence test. *Lupus*, 19(8), 906

**A Assadian, O Assadian, G Holak, T Watkins-Riedel, C Senekowitsch, J Kovarik, G W Haggmuller** (2008//). Hemodialysis access surgery- is there an increased risk of acquiring hepatitis C virus compared to other elective vascular interventions?. *VASA. Zeitschrift fur Gefasskrankheiten*, 37(1), 81

**A Behzad-Behbahani, A Mafi-Nejad, S Z Tabei, K B Lankarani, A Torab, A Moaddab** (2006//). Anti-HBc & HBV-DNA detection in blood donors negative for hepatitis B virus surface antigen in reducing risk of transfusion associated HBV infection. *The Indian journal of medical research*, 123(1), 37

**A Berger, H W Doerr, H F Rabenau, B Weber** (2000//). High frequency of HCV infection in individuals with isolated antibody to hepatitis B core antigen. *Intervirology*, 43(2), 71

**A Berger, W Preiser, H W Doerr** (2001//). The role of viral load determination for the management of human immunodeficiency virus, hepatitis B virus and hepatitis C virus infection. *Journal of clinical virology: the official publication of the Pan American Society for Clinical Virology*, 20(1-2), 23

**A Carroccio, L Giannitrapani, M Soresi, T Not, G Iacono, C Di Rosa, E Panfili, A Notarbartolo, G Montalto** (2001//). Guinea pig transglutaminase immunolinked assay does not predict coeliac disease in patients with chronic liver disease. *Gut*,

49(4), 506

**A Cecille, M J Wendling, O Panabieres, J P Gut** (1999//). [Retrospective study of the value of the RIBA-3 test in 68 patients with discordant serologies with regard to hepatitis C obtained with third generation ELISA tests. Is there still a value in RIBA-3?]. *Pathologie-biologie*, 47(5), 508

**A D Shannon, C Morrissy, S G Mackintosh, H A Westbury** (1993//). Detection of hog cholera virus antigens in experimentally-infected pigs using an antigen-capture ELISA. *Veterinary microbiology*, 34(3), 233

**A Diez, J A Quiroga, M Melero, G Moraleda, I Castillo, J C Porres, V Carreno** (1991//). Detection of antibody to calmodulin in chronic viral hepatitis: lack of correlation with virus replication and hepatocellular damage. *Digestion*, 49(3), 125

**A E Silva, B Hosein, R W Boyle, C T Fang, M Shindo, J G Waggoner, J H Hoofnagle, A M Di Bisceglie** (1994//). Diagnosis of chronic hepatitis C: comparison of immunoassays and the polymerase chain reaction. *The American journal of gastroenterology*, 89(4), 493

**A Goudeau, F Dubois** (2000//). [Diagnosis and biological surveillance of hepatitis C virus infections]. *La Revue du praticien*, 50(10), 1071

**A Granito, L Muratori, P Muratori, G Pappas, M Guidi, F Cassani, U Volta, A Ferri, M Lenzi, F B Bianchi** (2006//). Antibodies to filamentous actin (F-actin) in type 1 autoimmune hepatitis. *Journal of clinical pathology*, 59(3), 280

**A Heim, D Wagner, T Rothamel, U Hartmann, J Flik, W Verhagen** (1999//). Evaluation of serological screening of cadaveric sera for donor selection for cornea transplantation. *Journal of medical virology*, 58(3), 291

**A J Czaja, H F Taswell, J Rakela, C M Schimek** (1991//). Frequency and significance of antibody to hepatitis C virus in severe corticosteroid-treated autoimmune chronic active hepatitis. *Mayo Clinic proceedings*, 66(6), 572

**A J Czaja, H F Taswell, J Rakela, C Schimek** (1992//). Frequency of antibody to hepatitis C virus in asymptomatic HBsAg-negative chronic active hepatitis. *Journal of hepatology*, 14(1), 88

**A J Czaja, S Magrin, C Fabiano, G Fiorentino, O Diquattro, A Craxi, L Pagliaro** (1995//). Hepatitis C virus infection as a determinant of behavior in type 1 autoimmune hepatitis. *Digestive diseases and sciences*, 40(1), 33

- A J Weiner, H M Geysen, C Christopherson, J E Hall, T J Mason, G Saracco, F Bonino, K Crawford, C D Marion, K A Crawford** (1992//). Evidence for immune selection of hepatitis C virus (HCV) putative envelope glycoprotein variants: potential role in chronic HCV infections. *Proceedings of the National Academy of Sciences of the United States of America*, 89(8), 3468
- A K Panigrahi, S K Panda, R K Dixit, K V Rao, S K Acharya, S Dasarathy, A Nanu** (1997//). Magnitude of hepatitis C virus infection in India: prevalence in healthy blood donors, acute and chronic liver diseases. *Journal of medical virology*, 51(3), 167
- A Khanna, C D Poduri, P Murugan, S Kumar, V S Sugunan, K T Shenoy, M R Das** (1998//). Analysis of human immune response to potential hepatitis C viral epitopes. *Acta virologica*, 42(3), 141
- A Kubota, S Okamura, F Omori, K Shimoda, T Otsuka, H Ishibashi, Y Niho** (1995//). High serum levels of granulocyte-macrophage colony-stimulating factor in patients with liver cirrhosis and granulocytopenia. *Clinical and laboratory haematology*, 17(1), 61
- A M Atta, P Estevam, R Parana, C M Pereira, B C O Leite, M L B Sousa-Atta** (2008//). Antiphospholipid antibodies in Brazilian hepatitis C virus carriers. *Brazilian journal of medical and biological research = Revista brasileira de pesquisas medicas e biologicas / Sociedade Brasileira de Biofisica ... [et al.]*, 41(6), 489
- A M E C Barreto, K Takei, Sabino E C, M A O Belleza, N A Salles, C C Barreto, A S Nishiya, D F Chamone** (2008//). Cost-effective analysis of different algorithms for the diagnosis of hepatitis C virus infection. *Brazilian journal of medical and biological research = Revista brasileira de pesquisas medicas e biologicas / Sociedade Brasileira de Biofisica ... [et al.]*, 41(2), 126
- A M Prince, J W Scheffel, B Moore** (1997//). A search for hepatitis C virus polymerase chain reaction-positive but seronegative subjects among blood donors with elevated alanine aminotransferase. *Transfusion*, 37(2), 211
- A M Yamamoto, C Johanet, J C Duclos-Vallee, F A Bustarret, F Alvarez, J C Homberg, J F Bach** (1997//). A new approach to cytochrome CYP2D6 antibody detection in autoimmune hepatitis type-2 (AIH-2) and chronic hepatitis C virus (HCV) infection: a sensitive and quantitative radioligand assay. *Clinical and experimental immunology*, 108(3), 396
- A Martini, G Fattovich, M Guido, E Bugianesi, A Biasiolo, D Ieluzzi, A Gallotta, G Fassina, C Merkel, A Gatta, F Negro, P Pontisso** (2015//). HCV genotype 3 and squamous cell carcinoma antigen (SCCA)-IgM are independently associated with histological features of NASH in HCV-infected patients. *Journal of viral hepatitis*, 22(10), 800
- A Monteverde, G Airoidi, M Ballare, G Fortina, V Quaglia, A Pigatto, P Manzini** (1993//). Reliability of immunoassays for anti-HCV antibodies (ELISA and RIBA II) in patients with essential mixed cryoglobulinemia (EMC). *Clinical and experimental rheumatology*, 11(6), 609
- A Nishizono, H Terao, R Shutoh, M Nasu, K Mifune, B J Wun, B Montas, F S Fernandez** (1997//). Genotyping of hepatitis C virus in the Dominican Republic. *The American journal of tropical medicine and hygiene*, 57(6), 719
- A O Shittu, H O Olawumi, J O Adewuyi** (2014//). Pre-donation screening of blood for transfusion transmissible infections: the gains and the pains - experience at a resource limited blood bank. *Ghana medical journal*, 48(3), 158
- A Pekarikova, D Sanchez, L Palova-Jelinkova, M Simsova, Z Benes, I Hoffmanova, P Drastich, I Janatkova, T Mothes, H Tlaskalova-Hogenova, L Tuckova** (2010//). Calreticulin is a B cell molecular target in some gastrointestinal malignancies. *Clinical and experimental immunology*, 160(2), 215
- A Pivert, C Payan, P Morand, S Fafi-Kremer, J Deshayes, F Carrat, S Pol, P Cacoub, C Perronne, F Lunel** (2006//). Comparison of serum hepatitis C virus (HCV) RNA and core antigen levels in patients coinfecting with human immunodeficiency virus and HCV and treated with interferon plus ribavirin. *Journal of clinical microbiology*, 44(2), 417
- A Widell, G Sundstrom, B G Hansson, T Moestrup, E Nordenfelt** (1991//). Antibody to hepatitis-C-virus-related proteins in sera from alanine-aminotransferase-screened blood donors and prospectively studied recipients. *Vox sanguinis*, 60(1), 28
- A Widell, V Molnegren, F Pieksma, M Calmann, J Peterson, S R Lee** (2002//). Detection of hepatitis C core antigen in serum or plasma as a marker of hepatitis C viraemia in the serological window-phase. *Transfusion medicine (Oxford, England)*, 12(2), 107
- A Xiang, F Wei, X Lei, Y Liu, Y Liu, Y Guo** (2013//). A simple and rapid capillary chemiluminescence immunoassay for quantitatively detecting human serum HBsAg. *European journal of clinical microbiology &*

*infectious diseases : official publication of the European Society of Clinical Microbiology*, 32(12), 1557

**A Yaari, D Tovbin, M Zlotnick, M Mostoslavsky, Y Shemer-Avni, N Hanuka, Z Burbea, Z Katzir, S Storch, M Margalith** (2006//). Detection of HCV salivary antibodies by a simple and rapid test. *Journal of virological methods*, 133(1), 1

**A Zibert, H Meisel, W Kraas, A Schulz, G Jung, M Roggendorf** (1997//). Early antibody response against hypervariable region 1 is associated with acute self-limiting infections of hepatitis C virus. *Hepatology (Baltimore, Md.)*, 25(5), 1245

**A Zibert, W Kraas, R S Ross, H Meisel, S Lechner, G Jung, M Roggendorf** (1999//). Immunodominant B-cell domains of hepatitis C virus envelope proteins E1 and E2 identified during early and late time points of infection. *Journal of hepatology*, 30(2), 177

**Abdelfattah M Attallah, Faten Zahran, Hisham Ismail, Mohamed M Omran, Ibrahim El-Dosoky, Gamal E Shiha** (2007//). Immunochemical identification and detection of serum fibronectin in liver fibrosis patients with chronic hepatitis C. *Journal of immunoassay & immunochemistry*, 28(4), 331

**Abdelfattah M Attallah, Hisham Ismail, Ashraf A Tabll, Gamal E Shiha, Ibrahim El-Dosoky** (2003//). A novel antigen detection immunoassay for field diagnosis of hepatitis C virus infection. *Journal of immunoassay & immunochemistry*, 24(4), 395

**Abdelfattah M Attallah, Hisham Ismail, Gamal E Shiha, Mohamed I Abou-Dobara, Rania E El-Sherbiny, Ibrahim El-Dosoky** (2008//). Immunochemical identification and partial characterization of a native hepatitis C viral non-structural 4 antigen in sera of HCV infected patients. *Clinica chimica acta; international journal of clinical chemistry*, 388(1-2), 115

**Abdelfattah M Attallah, Mohamed El-Far, Mohamed M Omran, Khaled Farid, Ahmed A Attallah, Dalal Abd-Elaziz, Mohamed S El-Bendary, Ibrahim El-Dosoky, Hisham Ismail** (2016//). Levels of Schistosoma mansoni Circulating Antigen in Chronic Hepatitis C Patients with Different Stages of Liver Fibrosis. *Journal of immunoassay & immunochemistry*, 37(3), 316

**Abdelfattah M Attallah, Mohamed M Omran, Wesam A Nasif, Mohamed F Ghaly, Abd El-Raheem R El-Shanshoury, Mohga S Abdalla, Hayat M Sharada, Khaled Farid, Wageh El-Shony, El-Sayed M Moussa, Ehab B El-Domany,**

**Eman Nour, Ibrahim Eldosoky** (2012//). Diagnostic performances of hepatitis C virus-NS4 antigen in patients with different liver pathologies. *Archives of medical research*, 43(7), 555

**Abdelfattah M Attallah, Sanaa O Abdallah, Amr S El Sayed, Mohamed M Omran, Mahmoud El-Bendary, Khaled Farid, Mohamed Kadry** (2011//). Non-invasive predictive score of fibrosis stages in chronic hepatitis C patients based on epithelial membrane antigen in the blood in combination with routine laboratory markers. *Hepatology research : the official journal of the Japan Society of Hepatology*, 41(11), 1075

**Abdelfattah M Attallah, Tamer E Mosa, Mohamed M Omran, Mostafa M Abo-Zeid, Ibrahim El-Dosoky, Yehia M Shaker** (2007//). Immunodetection of collagen types I, II, III, and IV for differentiation of liver fibrosis stages in patients with chronic HCV. *Journal of immunoassay & immunochemistry*, 28(2), 155

**Adalbert Krawczyk, Christian Hintze, Jessica Ackermann, Birgit Goitowski, Martin Trippler, Nico Gruner, Maria Neumann-Fraune, Jens Verheyen, Melanie Fiedler** (2014//). Clinical performance of the novel DiaSorin LIAISON() XL murex: HBsAg Quant, HCV-Ab, HIV-Ab/Ag assays. *Journal of clinical virology : the official publication of the Pan American Society for Clinical Virology*, 59(1), 44

**Addisalem T Makuria, Sukanya Raghuraman, Peter D Burbelo, Cathy C Cantilena, Robert D Allison, Joan Gibble, Barbara Rehermann, Harvey J Alter** (2012//). The clinical relevance of persistent recombinant immunoblot assay-indeterminate reactions: insights into the natural history of hepatitis C virus infection and implications for donor counseling. *Transfusion*, 52(9), 1940

**Adele Caterino-de-Araujo, Claudio Tavares Sacchi, Maria Gisele Goncalves, Karoline Rodrigues Campos, Mariana Cavalheiro Magri, Wong Kuen Alencar, Group of Surveillance and Diagnosis of HTLV of Sa~o Paulo (GSuDiHTLV-SP)** (2015//). Short Communication: Current Prevalence and Risk Factors Associated with Human T Lymphotropic Virus Type 1 and Human T Lymphotropic Virus Type 2 Infections Among HIV/AIDS Patients in Sao Paulo, Brazil. *AIDS research and human retroviruses*, 31(5), 543

**Adrian Gadano, Omar Galdame, Sebastian Marciano** (2010//). Diagnosis of patients with suspected chronic hepatitis C infection. *Annals of hepatology*, 9 Suppl(#issue#), 34

**Adrienn Biro, Anna Horvath, Lilian Varga,**

**Elemer Nemesanszky, Antal Csepregi, Karoly David, Gyula Tolvaj, Endre Ibranyi, Laszlo Telegdy, Alajos Par, Laszlo Romics, Istvan Karadi, Margit Horanyi, Judit Gervain, Pal Ribiczey, Mihaly Csondes, George Fust** (2003//). Serum anti-cholesterol antibodies in chronic hepatitis-C patients during IFN-alpha-2b treatment. *Immunobiology*, 207(3), 161

**Agnes Perrin, David Duracher, Magali Perret, Philippe Cleuziat, Bernard Mandrand** (2003//). A combined oligonucleotide and protein microarray for the codetection of nucleic acids and antibodies associated with human immunodeficiency virus, hepatitis B virus, and hepatitis C virus infections. *Analytical biochemistry*, 322(2), 148

**Ahmed Abdalla, Abd-Al Gawad Sheesha, Mohammad Shokeir, Osama el-Agrody, Mohammad Ezz el-Regal, Mohammad K Abdel-Khalik, Katherine Freeman, Anna Boneberg, Hassan H A-Kader** (2002//). Serum intercellular adhesion molecule-I in children with chronic liver disease: relationship to disease activity. *Digestive diseases and sciences*, 47(6), 1206

**Akihiro Tamori, Takehiro Hayashi, Mayumi Shinzaki, Sawako Kobayashi, Shuji Iwai, Masaru Enomoto, Hiroyasu Morikawa, Hiroki Sakaguchi, Susumu Shiomi, Shigekazu Takemura, Shoji Kubo, Norifumi Kawada** (2009//). Frequent detection of hepatitis B virus DNA in hepatocellular carcinoma of patients with sustained virologic response for hepatitis C virus. *Journal of medical virology*, 81(6), 1009

**Akira Yoshikawa, Yuhko Gotanda, Masako Itabashi, Kiyoshi Minegishi, Kimihiro Kanemitsu, Kusuya Nishioka, Japanese Red Cross NAT Screening Research Group** (2005//). HBV NAT positive [corrected] blood donors in the early and late stages of HBV infection: analyses of the window period and kinetics of HBV DNA. *Vox sanguinis*, 88(2), 77

**Alessandra Biasiolo, Natascia Tono, Martina Zaninotto, Carlo Merkel, Giorgio Fassina, Mario Plebani, Angelo Gatta, Patrizia Pontisso** (2013//). Specificity of squamous cell carcinoma antigen (SCCA)-IgM detection in patients with HCV infection and rheumatoid factor seropositivity. *Journal of medical virology*, 85(6), 1005

**Alexandra Nieters, Birgit Kallinowski, Paul Brennan, Melanie Ott, Marc Maynadie, Yolanda Benavente, Lenka Foretova, Pier Luigi Cocco, Anthony Staines, Martine Vornanen, Denise Whitby, Paolo Boffetta, Nikolaus Becker, Silvia De Sanjose** (2006//). Hepatitis C and risk of lymphoma: results of the European multicenter

case-control study EPILYMPH. *Gastroenterology*, 131(6), 1879

**Alexsandro S Galdino, Jose C Santos, Marilen Q Souza, Yanna K M Nobrega, Mary-Ann E Xavier, Maria S S Felipe, Sonia M Freitas, Fernando A G Torres** (2016//). A Novel Structurally Stable Multi-epitope Protein for Detection of HCV. *Hepatitis research and treatment*, 2016(#issue#), 6592143

**Ali Acar, Sabri Kemahli, Husnu Altunay, Erdogan Kosan, Oral Oncul, Levent Gorenek, Saban Cavuslu** (2010//). HBV, HCV and HIV seroprevalence among blood donors in Istanbul, Turkey: how effective are the changes in the national blood transfusion policies?. *The Brazilian journal of infectious diseases : an official publication of the Brazilian Society of Infectious Diseases*, 14(1), 41

**Ali Judd, John Parry, Matthew Hickman, Tamara McDonald, Laura Jordan, Kim Lewis, Marcela Contreras, Geoff Dusheiko, Graham Foster, Noel Gill, Katie Kemp, Janice Main, Iain Murray-Lyon, Mark Nelson** (2003//). Evaluation of a modified commercial assay in detecting antibody to hepatitis C virus in oral fluids and dried blood spots. *Journal of medical virology*, 71(1), 49

**Amelie Heinrichs, Martine Antoine, Deborah Steensels, Isabel Montesinos, Marie-Luce Delforge** (2016//). HCV false positive immunoassays in patients with LVAD: A potential trap!. *Journal of clinical virology : the official publication of the Pan American Society for Clinical Virology*, 78(#issue#), 44

**Amira El Tawdy, Laila Rashed** (2012//). Downregulation of TLR-7 receptor in hepatic and non-hepatic patients with lichen planus. *International journal of dermatology*, 51(7), 785

**Amjad Ali, Muhammad Nisar, Muhammad Idrees, Shazia Rafique, Muhammad Iqbal** (2015//). Expression of Hepatitis C Virus Core and E2 antigenic recombinant proteins and their use for development of diagnostic assays. *International journal of infectious diseases : IJID : official publication of the International Society for Infectious Diseases*, 34(#issue#), 84

**Ana M Contreras, Rodolfo J Ochoa-Jimenez, Alfredo Celis, Claudia Mendez, Laura Olivares, Claudia E Rebolledo, Isabel Hernandez-Lugo, Ana I Aguirre-Zavala, Ricardo Jimenez-Mendez, Raymond T Chung** (2010//). High antibody level: an accurate serologic marker of viremia in asymptomatic people with hepatitis C infection. *Transfusion*, 50(6), 1335

**Andrew L Singer, Lauren M Kucirka, Ruth Namuyinga, Colleen Hanrahan, Aruna K Subramanian, Dorry L Segev** (2008//). The high-risk donor: viral infections in solid organ transplantation. *Current opinion in organ transplantation*, 13(4), 400

**Anis Khan, Yasuhito Tanaka, Fuat Kurbanov, Abeer Elkady, Zaigham Abbas, Zahid Azam, Amna Subhan, Sajjad Raza, Sajjad Razza, Saeed Hamid, Wasim Jafri, James Shih, Ningshao Xia, Kazuaki Takahashi, Shunji Mishiro, Masashi Mizokami** (2011//). Investigating an outbreak of acute viral hepatitis caused by hepatitis E virus variants in Karachi, South Pakistan. *Journal of medical virology*, 83(4), 622

**Anita Chakravarti, Mayank S Chauhan, Gaurav Dogra, Sayantan Banerjee** (2013//). Hepatitis C virus core antigen assay: can we think beyond convention in resource limited settings?. *The Brazilian journal of infectious diseases : an official publication of the Brazilian Society of Infectious Diseases*, 17(3), 369

**Antoni Xavier Torres-Collado, Albert J Czaja, Carmen Gelpi** (2005//). Anti-tRNP(ser)sec/SLA/LP autoantibodies. Comparative study using in-house ELISA with a recombinant 48.8 kDa protein, immunoblot, and analysis of immunoprecipitated RNAs. *Liver international : official journal of the International Association for the Study of the Liver*, 25(2), 410

**Aseem K Tiwari, Prashant K Pandey, Avinash Negi, Ruchika Bagga, Ajay Shanker, Usha Baveja, Raina Vimarsh, Richa Bhargava, Ravi C Dara, Ganesh Rawat** (2015//). Establishing a sample-to-cut-off ratio for lab-diagnosis of hepatitis C virus in Indian context. *Asian journal of transfusion science*, 9(2), 185

**Aseem K Tiwari, Prashant K Pandey, Ravi C Dara, Ganesh S Rawat, Vimarsh Raina, Richa Bhargava** (2015//). Evaluation of a new serological test for syphilis based on chemiluminescence assay in a tertiary care hospital. *Asian journal of transfusion science*, 9(1), 65

**Ashish Chandra Shrestha, Prakash Ghimire, Bishnu Raj Tiwari, Manita Rajkarnikar** (2009//). Transfusion-transmissible infections among blood donors in Kathmandu, Nepal. *Journal of infection in developing countries*, 3(10), 794

**Ashraf A Tabll, Samy B Khalil, Reem M El-Shenawy, Gamal Esmat, Amr Helmy, Abdel Fattah Attallah, Mostafa K El-Awady** (2008//). Establishment of hybrid cell lines producing monoclonal antibodies to a synthetic peptide from

the E1 region of the hepatitis C virus. *Journal of immunoassay & immunochemistry*, 29(1), 91

**Axel zur Hausen, Josine van Beek, Elisabeth Bloemena, Fiebo J ten Kate, Chris J L M Meijer, Adriaan J C van den Brule** (2003//). No role for Epstein-Barr virus in Dutch hepatocellular carcinoma: a study at the DNA, RNA and protein levels. *The Journal of general virology*, 84(Pt 7), 1863

**Aya Mostafa, Sylvia M Taylor, Mai el-Daly, Mostafa el-Hoseiny, Iman Bakr, Naglaa Arafa, Valerie Thiers, Francois Rimlinger, Mohamed Abdel-Hamid, Arnaud Fontanet, Mostafa K Mohamed** (2010//). Is the hepatitis C virus epidemic over in Egypt? Incidence and risk factors of new hepatitis C virus infections. *Liver international : official journal of the International Association for the Study of the Liver*, 30(4), 560

**Aamado L., Villar L.M., Paula V.S., Almeida A.J., Gaspar A.M.C.** (2006//). Detection of hepatitis A, B, and C virus-specific antibodies using oral fluid for epidemiological studies *Memorias do Instituto Oswaldo Cruz*, 101(2), 149

**Abdallah N., Abdel Aziz H.K., Hamed N.A., Gamal M.** (2010//). Correlation between serum levels of interleukins 10 and 12 and thrombocytopenia in hepatitis c cirrhotic (class A) patients *Journal of Venomous Animals and Toxins Including Tropical Diseases*, 16(3), 456

**Abdel Hady S.I., El-Din M.S., El-Din M.E.** (1998//). A high hepatitis E virus (HEV) seroprevalence among unpaid blood donors and haemodialysis patients in Egypt *The Journal of the Egyptian Public Health Association*, 73(3-4), 165

**Abdel-Latif M.S.** (2015//). Plasma levels of matrix metalloproteinase (MMP)-2, MMP-9 and tumor necrosis factor-alpha in chronic hepatitis C virus patients *Open Microbiology Journal*, 9(#issue#), 136

**Abdel-Razik A., Mousa N., Elbaz S., Eissa M., Elhelaly R., Eldars W.** (2015//). Diagnostic utility of interferon gamma-induced protein 10 kDa in spontaneous bacterial peritonitis: Single-center study *European Journal of Gastroenterology and Hepatology*, 27(9), 1087

**Abdelkader N.A., Abdelmoniem S.S., Sabry D., Abdelbaky A.M., Mahdy M.M., Zaky E., Saad W.E.** (2014//). Vitamin D and IL28B genotyping as predictors for antiviral therapy: A retrospective study in Egyptian HCV genotype 4a *Tropical Journal of Pharmaceutical Research*, 13(10), 1725

**Abo Elmagd E.K., Abdel-Wahab K.S., Alrasheedy**

- Z.E.,Khalifa A.S.** (2011//). An Egyptian study of mother to child transmission of hepatitis C virus *International Journal of Virology*, 7(3), 100
- Acquaye J.K.,Tetty-Donkor D.** (2000//). Frequency of hepatitis C virus antibodies and elevated serum alanine transaminase levels in Ghanaian blood donors *West African journal of medicine*, 19(4), 239
- Afonso A.M.R.,Didier J.,Plouvier E.,Falissard B.,Ferey M.P.,Bogard M.,Dussaix E.** (2000//). Performance of an automated system for quantification of hepatitis C virus RNA *Journal of Virological Methods*, 86(1), 55
- Ahmed M.A.-H.,Ellakwa D.E.-S.,Omar N.N.** (2014//). Role of serum osteopontin level as a diagnostic biomarker for early hepatocellular carcinoma *International Journal of Cancer Research*, 10(1), 37
- Ahn J.,Cohen S.M.** (2008//). Transmission of human immunodeficiency virus and hepatitis C virus through liver transplantation *Liver Transplantation*, 14(11), 1603
- Ajorloo M.,Bamdad T.,Hashempour T.,Alborzi A.M.,Mozhgani S.H.,Asadi R.,Haj-sheykholeslami A.,Merat S.** (2015//). Detection of Specific Antibodies to HCV-ARF/CORE+1 Protein in Cirrhotic and Non-Cirrhotic Patients with Hepatitis C: A Possible Association with Progressive Fibrosis *Archives of Iranian medicine*, 18(5), 304
- Alatrakchi N.,Graham C.S.,Van Der Vliet H.J.J.,Sherman K.E.,Exley M.A.,Koziel M.J.** (2007//). Hepatitis C virus (HCV)-specific CD8+ cells produce transforming growth factor beta that can suppress HCV-specific T-cell responses *Journal of Virology*, 81(11), 5882
- Albertoni G.,Arnoni C.P.,Araujo P.R.B.,Carvalho F.O.,Barreto J.A.** (2010//). Signal to cutoff (S/CO) ratio and detection of HCV genotype 1 by realtime PCR one-step method: Is there any direct relationship? *Brazilian Journal of Infectious Diseases*, 14(2), 147
- Ali O.S.,Abo-Shadi M.A.,Hammad L.N.** (2005//). The biological significance of serum complements C3 and C4 in HCV-related chronic liver diseases and hepatocellular carcinoma *The Egyptian journal of immunology / Egyptian Association of Immunologists*, 12(2), 91
- Ali S.,Van Pelt J.F.,Verslype C.,Nevens F.,Feverly J.,Yap S.H.** (2004//). TT virus infection in acute and chronic liver diseases and in patients regularly receiving blood products in Belgium *Acta Gastro-Enterologica Belgica*, 67(2), 161
- Allain J.-P.** (2005//). Hepatitis C virus in blood donation *Lancet*, 365(9456), 276
- Alvarez-Lajonchere L.,Guerra I.,Amador-Canizares Y.,Frias R.,Vazquez-Blomquist D.,Morales J.,Duenas-Carrera S.** (2007//). Generation and characterization of recombinant vaccinia viruses expressing a hepatitis C virus Core protein, genotype 1b, individually or as a polyprotein *Biotechnologia Aplicada*, 24(3-4), 246
- Anonymous.** (2002//). NIH Consensus Statement on Management of Hepatitis C: 2002 *NIH consensus and state-of-the-science statements*, 19(3), 1
- Anonymous.** (1993//). False-positive serologic tests for human T-cell lymphotropic virus type I among blood donors following influenza vaccination, 1992 *MMWR. Morbidity and mortality weekly report*, 42(9), 173
- Anonymous.** (1992//). Immunogenic polypeptides with epitopes specific for hepatitis C virus *Current Opinion in Therapeutic Patents*, 2(11), 1865
- Ansari M.A.,Irshad M.,Agarwal S.K.,Chosdol K.** (2013//). Expression of the full-length HCV core subgenome from HCV genotype-1a and genotype-3a and evaluation of the antigenicity of translational products *European Journal of Gastroenterology and Hepatology*, 25(7), 806
- Arapinis C.,Kostaridou S.,Kattamis C.** (1997//). Effective detection of active HCV infection: HCV RNA carrier state in a context free of hepatitis symptoms *Clinica Chimica Acta*, 258(1), 91
- Arora M.M.,Bhatia J.K.** (2007//). Aggressive use of diagnostic services is counterproductive *Medical Journal Armed Forces India*, 63(3), 253
- Attallah A.M.,El-Din N.K.,Omran M.M.,Farid K.,El-Wahab A.H.,El-Bendary M.,El-Dosoky I.** (2011//). Assessment of matrix metalloproteinase-1 for marking liver cirrhosis in chronic hepatitis C patients *The Egyptian journal of immunology / Egyptian Association of Immunologists*, 18(1), 33
- Attallah A.M.,Shiha G.E.,Abdel Malak C.A.,Hagras H.E.,Abdel-Razik W.S.,Ismail H.** (2004//). Utility of a novel HCV-NS4 antigen detection immunoassay for monitoring treatment of HCV-infected individuals with pegylated interferon alpha-2a *Hepatology Research*, 28(2), 68
- B C Dow, H Munro, I Buchanan, E A Follett, F Davidson, P L Yap, P Simmonds** (1996//). Third-generation recombinant immunoblot assay: comparison of reactivities according to hepatitis C virus genotype. *Transfusion*, 36(6), 547

**B Erer, E Angelucci, G Lucarelli, C Giardini, D Baronciani, M Galimberti, P Polchi, G Amadei, L Battistini, S Paolucci** (1994//). Hepatitis C virus infection in thalassemia patients undergoing allogeneic bone marrow transplantation. *Bone marrow transplantation*, 14(3), 369

**B Hosein, C T Fang, M A Popovsky, J Ye, M Zhang, C Y Wang** (1991//). Improved serodiagnosis of hepatitis C virus infection with synthetic peptide antigen from capsid protein. *Proceedings of the National Academy of Sciences of the United States of America*, 88(9), 3647

**B J Pereira, E L Milford, R L Kirkman, S Quan, K R Sayre, P J Johnson, J C Wilber, A S Levey** (1992//). Prevalence of hepatitis C virus RNA in organ donors positive for hepatitis C antibody and in the recipients of their organs. *The New England journal of medicine*, 327(13), 910

**B L C Marques, C U Brandao, E F Silva, V A Marques, C A Villela-Nogueira, K M R Do O, M T de Paula, L L Lewis-Ximenez, E Lampe, L M Villar** (2012//). Dried blood spot samples: optimization of commercial EIAs for hepatitis C antibody detection and stability under different storage conditions. *Journal of medical virology*, 84(10), 1600

**B Luettig, K H Boeker, W Schoessler, H Will, S Loges, E Schmidt, H J Worman, M E Gershwin, M P Manns** (1998//). The antinuclear autoantibodies Sp100 and gp210 persist after orthotopic liver transplantation in patients with primary biliary cirrhosis. *Journal of hepatology*, 28(5), 824

**B M McFarlane, C B Bridger, H M Smith, K A Antonov, N Naoumov, R Williams, I G McFarlane** (1995//). Autoimmune mechanisms in chronic hepatitis B and delta virus infections. *European journal of gastroenterology & hepatology*, 7(7), 615

**B M McFarlane, C Bridger, C J Tibbs, M G Saleh, A Fuzio, G Verucchi, L Attard, A Boschi, F Chiodo, I G McFarlane** (1994//). Virus-induced autoimmunity in hepatitis C virus infections: a rare event. *Journal of medical virology*, 42(1), 66

**B Nalpas, V Thiers, S Pol, F Driss, V Thepot, P Berthelot, C Brechot** (1992//). Hepatitis C viremia and anti-HCV antibodies in alcoholics. *Journal of hepatology*, 14(2-3), 381

**B P Thornton, V Vetvicka, G D Ross** (1996//). Function of C3 in a humoral response: iC3b/C3dg bound to an immune complex generated with natural antibody and a primary antigen promotes antigen uptake and the expression of co-stimulatory molecules by all B cells, but only

stimulates immunoglobulin synthesis by antigen-specific B cells. *Clinical and experimental immunology*, 104(3), 531

**B S Kim, Y M Park** (1993//). Prevalence of hepatitis C virus related to liver diseases in Korea. *Gastroenterologia Japonica*, 28 Suppl 5(#issue#), 17

**B S Tzang, T Y Chen, T C Hsu, Y C Liu, G J Tsay** (1999//). Presentation of autoantibody to proliferating cell nuclear antigen in patients with chronic hepatitis B and C virus infection. *Annals of the rheumatic diseases*, 58(10), 630

**B Sarov, L Novack, N Beer, J Safi, H Soliman, J S Pliskin, E Litvak, A Yaari, E Shinar** (2007//). Feasibility and cost-benefit of implementing pooled screening for HCVAg in small blood bank settings. *Transfusion medicine (Oxford, England)*, 17(6), 479

**B Weber, W Melchior, R Gehrke, H W Doerr, A Berger, H Rabenau** (2001//). Hepatitis B virus markers in anti-HBc only positive individuals. *Journal of medical virology*, 64(3), 312

**Bailin Tu, Robert N Ziemann, Bryan C Tieman, David J Hawksworth, Joan Tyner, James Scheffel, Mary S Pinkus, Susan E Brophy, Jeffrey M Werneke, Robin Gutierrez, Michael White** (2010//). Generation and characterization of chimeric antibodies against NS3, NS4, NS5, and core antigens of hepatitis C virus. *Clinical and vaccine immunology : CVI*, 17(6), 1040

**Benoit Visseaux, Lucile Larrouy, Ruxandra Calin, Christine Katlama, Thierry Poynard, Vlad Ratziu, Vincent Thibault** (2013//). Anti-hepatitis C virus antibody detection in oral fluid: influence of human immunodeficiency virus co-infection. *Journal of clinical virology : the official publication of the Pan American Society for Clinical Virology*, 58(2), 385

**Bettina Langhans, Ingrid Braunschweiger, Susann Schweitzer, Tilman Sauerbruch, Ulrich Spengler** (2004//). Primary immunisation of hepatitis C virus (HCV)-specific antibody producing B cells by lipidated peptides. *Vaccine*, 22(11-12), 1441

**Bin Tan, Li Qin, ChunXia Chen, ChunYan Huang, Bing Han, LiXin Wang, ZengZhen Wei** (2015//). Multiplex fluorescence quantitative polymerase chain reaction for simultaneous detection of hepatitis B virus, hepatitis C virus and human immunodeficiency virus. *Clinical laboratory*, 61(1-2), 53

**Bo Feng, Rui-Feng Yang, Hai-Ying Zhang, Bi-Fen Luo, Fan-Yun Kong, Hui-Ying Rao, Qian Jin, Xu**

**Cong, Lai Wei** (2015//). Early predictive efficacy of core antigen on antiviral outcomes in genotype 1 hepatitis C virus infected patients. *The Brazilian journal of infectious diseases : an official publication of the Brazilian Society of Infectious Diseases*, 19(4), 390

**Bo Jin, Richard Y Wang, Qi Qiu, Fuminaka Sugauchi, Teresa Grandinetti, Harvey J Alter, J Wai-Kuo Shih** (2007//). Induction of potent cellular immune response in mice by hepatitis C virus NS3 protein with double-stranded RNA. *Immunology*, 122(1), 15

**Bolormaa Dondog, Paul Schnitzler, Kristina M Michael, Gary Clifford, Silvia Franceschi, Michael Pawlita, Tim Waterboer** (2015//). Hepatitis C Virus Seroprevalence in Mongolian Women Assessed by a Novel Multiplex Antibody Detection Assay. *Cancer epidemiology, biomarkers & prevention : a publication of the American Association for Cancer Research, cosponsored by the American Society of Preventive Oncology*, 24(9), 1360

**Boutheina Cherif, Andre Roget, Christian L Villiers, Roberto Calemczuk, Vincent Leroy, Patrice N Marche, Thierry Livache, Marie-Bernadette Villiers** (2006//). Clinically related protein-peptide interactions monitored in real time on novel peptide chips by surface plasmon resonance imaging. *Clinical chemistry*, 52(2), 255

**Brenden C Smith, Yvonne Simpson, Muhammad G Morshed, Laura L E Cowen, Rebecca Hof, Charmaine Wetherell, Caroline E Cameron** (2013//). New proteins for a new perspective on syphilis diagnosis. *Journal of clinical microbiology*, 51(1), 105

**Brian Latimer, Roberta Toporovski, Jian Yan, Panyupa Pankhong, Matthew P Morrow, Amir S Khan, Niranjana Y Sardesai, Seth L Welles, Jeffrey M Jacobson, David B Weiner, Michele A Kutzler** (2014//). Strong HCV NS3/4a, NS4b, NS5a, NS5b-specific cellular immune responses induced in Rhesus macaques by a novel HCV genotype 1a/1b consensus DNA vaccine. *Human vaccines & immunotherapeutics*, 10(8), 2357

**Bruno Cacopardo, Marilia Rita Pinzone, Filippo Palermo, Giuseppe Nunnari** (2012//). Changes in serum Interleukin-33 concentration before and after treatment with pegylated interferon alfa-2a plus ribavirin in patients with chronic hepatitis C genotype 1b infection. *Hepatitis monthly*, 12(12), e7611

**Bruno Fernandes de Oliveira Santos, Nathalie Oliveira de Santana, Alex Vianey Callado Franca** (2011//). Prevalence, genotypes and factors

associated with HCV infection among prisoners in Northeastern Brazil. *World journal of gastroenterology*, 17(25), 3027

**Baath L.,Widell A.** (1994//). Anti-GOR without anti-HCV core is not associated with hepatitis C viremia [3] *Vox Sanguinis*, 66(2), 151

**Badr E.A.E.,Korah T.E.,Ghani A.A.,El-Sayed S.,Badr S.** (2014//). Role of serum glypican-3 in the diagnosis and differentiation of small hepatocellular carcinoma from hepatitis-C virus cirrhosis *Alexandria Journal of Medicine*, 50(3), 221

**Bailey J.R.,Dowd K.A.,Snider A.E.,Osburn W.O.,Mehta S.H.,Kirk G.D.,Thomas D.L.,Ray S.C.** (2015//). CD4+ T-Cell-Dependent Reduction in Hepatitis C Virus-Specific Neutralizing Antibody Responses After Coinfection With Human Immunodeficiency Virus *Journal of Infectious Diseases*, 212(6), 914

**Bakir T.M.F.,Halawani M.,Al-Ahdal M.N.,Kessie G.,Ramia S.** (1997//). Significance of serum hepatitis C virus RNA, IgM and IgG antibodies as markers of HCV infection *Medical Science Research*, 25(12), 853

**Baleriola C.,Johal H.,Robertson P.,Jacka B.,Whybin R.,Taylor P.,Rawlinson W.D.** (2012//). Infectious disease screening of blood specimens collected post-mortem provides comparable results to pre-mortem specimens *Cell and Tissue Banking*, 13(2), 251

**Balogun T.M.,Emmanuel S.,Ojerinde E.F.** (2012//). HIV, hepatitis B and C viruses' coinfection among patients in a nigerian tertiary hospital *Pan African Medical Journal*, 12(1), no pagination

**Barril G.,Quiroga J.A.,Arenas M.D.,Espinosa M.,Garcia-Fernandez N.,Cigarran S.,Herrero J.A.,Del Peso G.,Caro P.,Garcia-Agudo R.,Amezquita Y.,Blanco A.,Martinez-Rubio P.,Alcazar J.M.,Gonzalez-Parra E.,Martin-Gomez A.,Castillo I.,Bartolome J.,Carreno V.** (2014//). Impact of isolated hepatitis C virus (HCV) core-specific antibody detection and viral RNA amplification among HCV-seronegative dialysis patients at risk for infection *Journal of Clinical Microbiology*, 52(8), 3053

**Bashir M.F.,Haider M.S.,Rashid N.,Riaz S.** (2013//). Core gene expression and association of genotypes with viral load in hepatitis C virus (HCV) - Infected patients in Punjab Pakistan *Tropical Journal of Pharmaceutical Research*, 12(3), 335

**Bassat H.E.,Ali L.A.,Alm El-Din R.A.,Hasby E.,Shahbah A.** (2013//). Serum level of



interleukin-10 with its gene polymorphism can be predictors of response to treatment in Egyptian patients with chronic hepatitis C virus *Egyptian Journal of Medical Human Genetics*, 14(3), 227

**Batool A.,Khan M.I.,Bano K.A.** (2009//). Efficacy of immunoassay chromatography test for hepatitis-C antibodies detection *Journal of Ayub Medical College, Abbottabad : JAMC*, 21(3), 38

**Beardsley A.M.,LaBrooy J.T.,Rozen L.,Gowans E.J.** (1994//). A comparison of hepatitis C virus (HCV)-RNA and--antibody as markers of infection and predictors of infectivity *Australian and New Zealand journal of medicine*, 24(2), 182

**Beccari M.,Rizzolo L.,Ottolenghi A.,Sorgato G.** (2002//). Hepatitis C virus screening strategies in haemodialysis units [4] *Nephrology Dialysis Transplantation*, 17(8), 1536

**Behzad-Behbahani A.,Mafi-Nejad A.,Tabei S.Z.,Lankarani K.B.,Rashidi M.,Rasouli M.,Pourabbas B.,Torab A.,Salah A.R.** (2005//). Indication of Anti-HBc antibody screening and HBV-DNA detection in diagnosing latent hepatitis B virus infection *Iranian Journal of Medical Sciences*, 30(1), 28

**Beinhardt S.,Aberle J.H.,Strasser M.,Duliclakovic E.,Maieron A.,Kreil A.,Rutter K.,Staettermayer A.F.,Datz C.,Scherzer T.M.,Strassl R.,Bischof M.,Stauber R.,Bodlaj G.,Laferl H.,Holzmann H.,Steindlmunda P.,Ferenci P.,Hofer H.** (2012//). Serum level of IP-10 increases predictive value of IL28B polymorphisms for spontaneous clearance of acute HCV infection *Gastroenterology*, 142(1), 78

**Benkovskaya L.K.,Ivanska N.V.,Sergeyeva T.A.** (2013//). The molecular mimicry and its possible role in origin of false-positive results in HCV-infection testing *Biopolymers and Cell*, 29(5), 406

**Berezin S.W.,Bodenheimer Jr. H.C.** (1992//). Significance of a positive serologic test for hepatitis C *Pediatric Infectious Disease Journal*, 11(3), 340

**Bhardwaj K.,Prasad K.M.,Bhardwaj R.,Bhardwaj B.L.** (2013//). Seroprevalence of HBs ag and HCV in healthy blood donors at a tertiary care hospital in India *Research Journal of Pharmaceutical, Biological and Chemical Sciences*, 4(4), 1272

**Bhat N.A.,Khan M.A.,Shazia,Rafiq M.,Masoodi N.A.** (2002//). Safe blood and its rational use *JK Practitioner*, 9(2), 137

**Bhat N.M.,Kshirsagar M.A.,Bieber M.M.,Teng N.N.H.** (2015//). IgG subclasses and isotypes of vH4-34 encoded antibodies *Immunological Investigations*, 44(4), 400

**Bhattacharya P.,Chandra P.K.,Datta S.,Banerjee A.,Chakraborty S.,Rajendran K.,Basu S.K.,Bhattacharya S.K.,Chakravarty R.** (2007//). Significant increase in HBV, HCV, HIV and syphilis infections among blood donors in West Bengal, Eastern India 2004-2005: Exploratory screening reveals high frequency of occult HBV infection *World Journal of Gastroenterology*, 13(27), 3730

**Biernat M.,Gosciniak G.,Simon K.,Knysz B.,Rotter K.,Grabinska J.,Fleischer K.** (2007//). Helicobacter spp. infection and chronic liver diseases *Advances in Clinical and Experimental Medicine*, 16(4), 537

**Bingulac-Popovic J.,Grahovac B.,Zambeli J.,Mihaljevic I.,Drazic V.,Pirc-Tiljak D.,Petroveci M.,Balija M.,Grgicevic D.** (1998//). Detection of hepatitis C virus by polymerase chain reaction among Croatian blood donors and patients *Periodicum Biologorum*, 100(3), 389

**Bjoerkvoll B.,Viet L.,Ol H.S.,Lan N.T.,Sothy S.,Hoel H.,Gutteberg T.,Husebekk A.,Larsen S.,Husum H.** (2010//). Screening test accuracy among potential blood donors of HBsAg, anti-HBc and anti-HCV to detect hepatitis B and C virus infection in rural Cambodia and Vietnam *The Southeast Asian journal of tropical medicine and public health*, 41(5), 1127

**Blackard J.T.,Smeaton L.,Hiasa Y.,Horiike N.,Onji M.,Jamieson D.J.,Rodriguez I.,Mayer K.H.,Chung R.T.** (2005//). Detection of hepatitis C virus (HCV) in serum and peripheral-blood mononuclear cells from HCV-monoinfected and HIV/HCV-coinfected persons *Journal of Infectious Diseases*, 192(2), 258

**Bon C.,Brillard B.,Gelineau M.-C.,Mailliavin A.,Trepo C.,Pichot J.** (1998//). Decarboxyprothrombin : Diagnostic value in hepatocellular carcinoma *Annales de Biologie Clinique*, 56(2), 175

**Bonaguidi-Magniaux M.,Pilette C.,Oberti F.,Bidet M.-L.,Cales P.** (1996//). Follow-up of blood donors positive for HCV serology and of their recipients is insufficient *Gastroenterologie Clinique et Biologique*, 20(8-9), 663

**Bonilla N.,Barget N.,Andrieu M.,Roulot D.,Letoumelin P.,Grando V.,Trinchet J.C.,Ganne-Carrie N.,Beaugrand M.,Deny P.,Choppin J.,Guillet J.,Ziol M.** (2006//). Interferon gamma-secreting HCV-specific CD8+ T cells in the liver of patients with chronic C hepatitis: Relation to liver fibrosis - ANRS HC EP07 study *Journal of Viral Hepatitis*, 13(7), 474

**Bonne N.J.,Wong D.T.W.** (2012//). Salivary

biomarker development using genomic, proteomic and metabolomic approaches *Genome Medicine*, 4(10), no pagination

**Bosevska G.,Panovski N.,Dokic E.,Grunevska V.** (2008//). RT-PCR detection of HIV in Republic of Macedonia *Bosnian journal of basic medical sciences / Udruzenje basicnih medicinskih znanosti = Association of Basic Medical Sciences*, 8(4), 350

**Bradley D.W.** (1995//). Hepatitis E virus: A brief review of the biology, molecular virology, and immunology of a novel virus *Journal of Hepatology, Supplement*, 22(1), 140

**Brillanti S.,Masci C.,Miglioli M.,Barbara L.** (1993//). Serum IgM antibodies to hepatitis C virus in acute and chronic hepatitis C *Archives of virology. Supplementum*, 8(#issue#), 213

**Bruno C.M.,Valenti M.,Bertino G.,Ardiri A.,Consolo M.,Mazzarino C.M.,Amoroso A.,Neri S.** (2009//). Altered pattern of circulating matrix metalloproteinases -2,- 9 and tissue inhibitor of metalloproteinase-2 in patients with HCV-related chronic hepatitis. Relationship to histological features *Panminerva medica*, 51(4), 191

**Buisson Y.,Teyssou R.** (1996//). Biological diagnosis of hepatic C virus infections *Bulletin de l'Academie nationale de medecine*, 180(6), 1241

**Bull R.A.,Leung P.,Gaudieri S.,Deshpande P.,Cameron B.,Walker M.,Chopra A.,Lloyd A.R.,Luciani F.** (2015//). Transmitted/Founder Viruses Rapidly Escape from CD8+ T Cell Responses in Acute Hepatitis C Virus Infection *Journal of virology*, 89(10), 5478

**Busch M.P.,Korelitz J.J.,Kleinman S.H.,Lee S.R.,Aubuchon J.P.,Schreiber G.B.** (1995//). Declining value of alanine aminotransferase in screening of blood donors to prevent posttransfusion hepatitis B and C virus infection *Transfusion*, 35(11), 903

**Buti M.,Cotrina M.,Chan H.,Jardi R.,Rodriguez F.,Costa X.,Esteban R.,Guardia J.** (2000//). Rapid method for the detection of anti-HCV antibodies in patients with chronic hepatitis C *Revista espanola de enfermedades digestivas : organo oficial de la Sociedad Espanola de Patologia Digestiva*, 92(3), 140

**Butt A.S.,Jacobson I.M.** (2005//). Hepatitis C: Making the diagnosis *Consultant*, 45(9), 955

**Bychkov A.V.,Dorosevich A.E.,D'Souza J.W.** (2009//). Postmortem investigations following human immunodeficiency virus infection *International Journal of Collaborative Research on*

*Internal Medicine and Public Health*, 1(2), 28

**Cameron S.O.,Carman W.F.** (2005//). The use of the OraSure collection device for hepatitis virus testing in health care settings *Journal of clinical virology : the official publication of the Pan American Society for Clinical Virology*, 34 Suppl 1(#issue#), S22

**Carreno V.,Bartolome J.,Castillo I.,Quiroga J.A.** (2012//). New perspectives in occult hepatitis C virus infection *World Journal of Gastroenterology*, 18(23), 2887

**Caspari G.,Gerlich W.H.,Beyer J.,Schmitt H.** (1997//). Non-specific and specific anti-HCV results correlated to age, sex, transaminase, rhesus blood group and follow-up in blood donors *Archives of Virology*, 142(3), 473

**Catelle A.,Edert D.,Renoult E.,Cao Huu T.** (1992//). Incidence of hepatitis C virus in kidney transplantation recipients *Agressologie: revue internationale de physio-biologie et de pharmacologie appliquees aux effets de l'agression*, 33 Spec No 2(#issue#), 99

**Chan C.Y.,Huang Y.S.,Wu J.C.,Lu R.H.,Hwang S.J.,Wang Y.J.,Lee S.D.** (1995//). Detection of antibody to M2 mitochondrial antigen in Chinese patients with primary biliary cirrhosis *Zhonghua yi xue za zhi = Chinese medical journal; Free China ed*, 55(3), 214

**Chandrasekaran S.,Palaniappan N.,Krishnan V.,Mohana G.,Chandrasekaran N.** (2000//). Relative prevalence of hepatitis B viral markers and hepatitis C virus antibodies (anti HCV) in Madurai, south India *Indian journal of medical sciences*, 54(7), 270

**Charpentier C.,Champenois K.,Gervais A.,Landman R.,Joly V.,Le Gac S.,Larrouy L.,Damond F.,Brun-Vezinet F.,Descamps D.,Yazdanpanah Y.** (2013//). Predictive Value of Liver Enzymes and Inflammatory Biomarkers for the Severity of Liver Fibrosis Stage in HIV/HCV Co-Infected Patients *PLoS ONE*, 8(3), no pagination

**Charuworm P.,Cheung R.** (2008//). Diagnostic markers for hepatitis virus infection *Expert Opinion on Medical Diagnostics*, 2(3), 303

**Chattoraj A.,Behl R.,Kataria V.K.** (2008//). Infectious disease markers in blood donors *Medical Journal Armed Forces India*, 64(1), 33

**Chauhan R.S.,Cohen Tervaert J.W.,Conrad K.,Cooper G.S.,De Souza Querioz M.L.,Germolec D.R.,Hall A.J.,Ohsawa M.,Philen R.M.,Pieters R.H.H.,Rose N.R.,Van Loveren H.,Vos J.G.,Vickers**

- C., Damoiseaux J., De Jong W.H., Van Londen K., Colosio C., Corsini E., Descotes J., Lovik M., Luster M.I., Pallardy M., Kunz S.** (2006//). WHO task group on environmental health criteria on principles and methods for assessing autoimmunity associated with exposure to chemicals *Principles and Methods for Assessing Autoimmunity Associated with Exposure to Chemicals, Environmental Health Criteria*, #volume#(236), xi
- Chen J., Liu T., Chen Z., Hou J., Wu Y., Li M.** (2015//). Development of a time-resolved fluorescence immunoassay for Epstein-Barr virus zta iga antibodies in human serum *Viral Immunology*, 28(3), 179
- Chen J.-J., Liu T.-C., Liang Q.-N., Dong Z.-N., Wu Y.-S., Li M.** (2015//). Development of a time-resolved fluorescence immunoassay for Epstein-Barr virus nuclear antigen 1-immunoglobulin A in human serum *Journal of Medical Virology*, 87(11), 1940
- Chen M., Sallaberg M., Sonneborg A., Weiland O., Mattsson L., Jin L., Birkett A., Peterson D., Milich D.R.** (1999//). Limited humoral immunity in hepatitis C virus infection *Gastroenterology*, 116(1), 135
- Chen M., Zheng T., Han S., Zhang L., Bai Y., Fang X., Ding S.-Z., Yang Y.** (2015//). A preliminary study of plasma cyclase-associated protein 2 as a novel biomarker for early stage and alpha-fetoprotein negative hepatocellular carcinoma patients *Clinics and Research in Hepatology and Gastroenterology*, 39(2), 215
- Cheng C., Chenghua S., Ping L., Yizheng T., Qingjun M.** (1996//). Diagnosis of hepatitis C virus (HCV) infection by antigen-capturing ELISA *Clinical and Diagnostic Virology*, 6(2-3), 137
- Chevaliez S.** (2008//). Virological tests in hepatitis B and C *Hepato-Gastro*, 15(5), 345
- Chevaliez S., Rodriguez C., Pawlotsky J.-M.** (2012//). New virologic tools for management of chronic hepatitis B and C *Gastroenterology*, 142(6), 1303
- Choudhury N., Phadke S.** (2001//). Transfusion transmitted diseases *Indian journal of pediatrics*, 68(10), 951
- Christodoulou D., Christou L., Zervou E., Katsanos K., Kitsanou M., Tsianos E.V.** (2007//). Antiplatelet antibodies in patients with chronic viral hepatitis receiving interferon-alpha *Hepato-Gastroenterology*, 54(78), 1761
- Cicchetti A., Ruggeri M., Coretti S., Piscaglia A., Ponziani F.R., Lanati E., Gasbarrini A.** (2011//). Economic evaluation of an anti-HCV screening program in Italy *PharmacoEconomics - Italian Research Articles*, 13(2), 81
- Cleri D.J., Ricketti A.J., Vernaleo J.R.** (2010//). Combating the epidemiology of fear *Dialysis and Transplantation*, 39(5), 184
- Clossais Besnard N., Minjolle S., Gicquel J., Colimon R., Andre P.M.** (1995//). Automated determination of amplified PCR products: application to HCV viremia detection and quantification *Cellular and molecular biology (Noisy-le-Grand, France)*, 41(7), 959
- Cojocaru I.M., Cojocaru M., Burcin C.** (2007//). Ischemic stroke accompanied by anti-PR3 antibody-related cerebral vasculitis and hepatitis C virus infection *Romanian journal of internal medicine = Revue roumaine de medecine interne*, 45(1), 47
- Cojocaru M., Cojocaru I.M., Iacob S.A.** (2004//). Cerebral ischaemic attack in asymptomatic hepatitis C virus infection *Jugoslovenska Medicinska Biohemija*, 23(3), 289
- Cojocaru M., Cojocaru I.M., Matei I., Iacob S.A., Silosi I., Rogoz S.** (2008//). The value of interleukin-6 as a predictor of tissue injury due to hepatitis B virus replication *Archives of the Balkan Medical Union*, 43(1), 15
- Comunale M.A., Rodemich-Betesh L., Hafner J., Wang M., Norton P., di Bisceglie A.M., Block T., Mehta A.** (2010//). Linkage specific fucosylation of alpha-1-antitrypsin in liver cirrhosis and cancer patients: Implications for a biomarker of hepatocellular carcinoma *PLoS ONE*, 5(8), no pagination
- Comunale M.A., Wang M., Anbarasan N., Betesh L., Karabudak A., Moritz E., Devarajan K., Marrero J., Block T.M., Mehta A.** (2013//). Total serum glycan analysis is superior to lectin-FLISA for the early detection of hepatocellular carcinoma *Proteomics - Clinical Applications*, 7(9-10), 690
- Constantinescu I., Diaconu C., Grancea C., Bleontu C., Ruta S.M., Cernescu C.** (1998//). "Trial moves rapidly on, when the judge has determined the sentence beforehand" (W. Scott: Ivanhoe, 36) or pitfalls in serosurvey of anti-hepatitis C antibody in children *Romanian journal of virology*, 49(1-4), 11
- Constantinescu I., Petica M., Hoinarescu M., Oproiu A.** (2001//). Virological, clinical and histopathological aspects in patients with chronic hepatitis C virus infections *Annals of Fundeni Hospital*, 6(2-3), 104

**Coonrod D.V., Jack B.W., Stubblefield P.G., Hollier L.M., Boggess K.A., Cefalo R., Cox S.N., Dunlop A.L., Hunter K.D., Prasad M.R., Lu M.C., Conry J.A., Gibbs R.S., Hogan V.K.** (2008//). The clinical content of preconception care: infectious diseases in preconception care *American Journal of Obstetrics and Gynecology*, 199(6 SUPPL. B), S296

**Costa Z.B., Machado G.C., Avelino M.M., Filho C.G., Filho J.V.M., Minuzzi A.L., Turchi M.D., Stefani M.M.A., de Souza W.V., Martelli C.M.T.** (2009//). Prevalence and risk factors for Hepatitis C and HIV-1 infections among pregnant women in Central Brazil *BMC Infectious Diseases*, 9(#issue#), no pagination

**Coursaget P., Simpson B., el Goulli N., Ben Khelifa H., Kastally R.** (1992//). Hepatitis C core antibody detection in acute hepatitis and cirrhosis patients from Tunisia *Pathologie-biologie*, 40(6), 646

**Cruz-Ruiz M.A., Lopez Diaz F., Gonzalez-Ibarra F.P., Lara-Ortega C., Munoz-Ledo Guzman A.L., Patino-Lopez G.A.** (2013//). Prevalence of Antibodies for the hepatitis C virus in the Lowland (Bajio) region of Mexico *Archives of Medical Research*, 44(5), 390

**Cussenot O., Marie L., Janvier D., Benbunan M., Lassau J.P.** (1999//). Post-mortem detection of HIV, HTLV, hepatitis C viral infections to reduce the risk of contamination during anatomical cadaver dissections *European Journal of Internal Medicine*, 10(4), 223

**C A Schirren, M C Jung, T Worzfeld, M Mamin, G Baretton, J T Gerlach, N H Gruener, R Zachoval, M Houghton, H G Rau, G R Pape** (2001//). Hepatitis C virus-specific CD4+ T cell response after liver transplantation occurs early, is multispecific, compartmentalizes to the liver, and does not correlate with recurrent disease. *The Journal of infectious diseases*, 183(8), 1187

**C Alessandri, M Bombardieri, L Di Prospero, P Conigliaro, F Conti, G Labbadia, R Misasi, M Sorice, G Valesini** (2005//). Anti-lysobisphosphatidic acid antibodies in patients with antiphospholipid syndrome and systemic lupus erythematosus. *Clinical and experimental immunology*, 140(1), 173

**C Alonso, M L Pedroso, S de Sanjose, P Montcharmont, J M Chevre, M J Boucaud, V Lambert, M L Cortey, C Trepo** (1994//). Hepatitis C virus among blood donors: follow-up study. *Transfusion*, 34(6), 527

**C Bon, B Brillard, M C Gelineau, A Mailliavin, C Trepo, J Pichot** (1998//).

[Decarboxyprothrombin: importance in the diagnosis of hepatocellular carcinoma]. *Annales de biologie clinique*, 56(2), 175

**C Cao, C Shi, P Li, Y Tong, Q Ma** (1996//). Diagnosis of hepatitis C virus (HCV) infection by antigen-capturing ELISA. *Clinical and diagnostic virology*, 6(2-3), 137

**C Cattaneo, P A Nuttall, R J Sokol** (1996//). Detection of HIV, hepatitis B and hepatitis C markers in discarded syringes and bloodstains. *Science & justice : journal of the Forensic Science Society*, 36(4), 271

**C F Yoshida, C D Rouzere, R M Nogueira, E Lampe, M A Travassos-da-Rosa, B O Vanderborght, H G Schatzmayr** (1992//). Human antibodies to dengue and yellow fever do not react in diagnostic assays for hepatitis C virus. *Brazilian journal of medical and biological research = Revista brasileira de pesquisas medicas e biologicas / Sociedade Brasileira de Biofisica ... [et al.]*, 25(11), 1131

**C Ferri, F Greco, G Longombardo, P Palla, A Moretti, E Marzo, P V Fosella, G Pasero, S Bombardieri** (1991//). Antibodies to hepatitis C virus in patients with mixed cryoglobulinemia. *Arthritis and rheumatism*, 34(12), 1606

**C Hyland, C R Seed, P Kiely, S Parker, N Cowley, W Bolton** (2003//). Follow-up of six blood donors highlights the complementary role and limitations of hepatitis C virus antibody and nucleic acid amplification tests. *Vox sanguinis*, 85(1), 1

**C J McIver, C F H Jacques, S S W Chow, S C Munro, G M Scott, J A Roberts, M E Craig, W D Rawlinson** (2005//). Development of multiplex PCRs for detection of common viral pathogens and agents of congenital infections. *Journal of clinical microbiology*, 43(10), 5102

**C Janot, A M Courouze** (1990//). [Importance of the RIBA test for the diagnosis of antibodies against hepatitis C virus. "Viral Hepatitis" Study Group]. *Revue francaise de transfusion et d'hemobiologie : bulletin de la Societe nationale de transfusion sanguine*, 33(6), 439

**C Jolivet-Reynaud, P Dalbon, F Viola, S Yvon, G Paranhos-Baccala, N Piga, L Bridon, M A Trabaud, N Battail, G Sibai, M Jolivet** (1998//). HCV core immunodominant region analysis using mouse monoclonal antibodies and human sera: characterization of major epitopes useful for antigen detection. *Journal of medical virology*, 56(4), 300

**C L Thio, K R Nolt, J Astemborski, D Vlahov, K E**

**Nelson, D L Thomas** (2000//). Screening for hepatitis C virus in human immunodeficiency virus-infected individuals. *Journal of clinical microbiology*, 38(2), 575

**C L van der Poel, D Bresters, H W Reesink, A A Plaisier, W Schaasberg, A Leentvaar-Kuypers, Q L Choo, S Quan, A Polito, M Houghton** (1992//). Early antihepatitis C virus response with second-generation C200/C22 ELISA. *Vox sanguinis*, 62(4), 208

**C L van der Poel, H W Reesink, W Schaasberg, A Leentvaar-Kuypers, E Bakker, P J Exel-Oehlers, P N Lelie** (1990//). Infectivity of blood seropositive for hepatitis C virus antibodies. *Lancet (London, England)*, 335(8689), 558

**C M Nubling, H Bialleck, A J Fursch, I Scharrer, W Schramm, E Seifried, U Schmidt, S Staszewski, J Lower** (1997//). Frequencies of GB virus C/hepatitis G virus genomes and of specific antibodies in German risk and non-risk populations. *Journal of medical virology*, 53(3), 218

**C Mancini, D Rivanera, D Lilli, G Di Cuonzo, S Angeletti, G Lorino, G M De Sanctis, I G Barbacini, G Leonetti, P Bianchi, L V Chircu, C Galli** (1995//). IgM anti-hepatitis C virus in patients with chronic non-A, non-B hepatitis and their relationship to viral replication. *Clinical and diagnostic virology*, 4(4), 293

**C Micha Nubling, Michael Chudy, Peter Volkers, Johannes Lower** (2006//). Neopterin levels during the early phase of human immunodeficiency virus, hepatitis C virus, or hepatitis B virus infection. *Transfusion*, 46(11), 1886

**C P U Brandao, B L C Marques, V A Marques, C A Villela-Nogueira, K M R Do O, M T de Paula, L L Lewis-Ximenez, E Lampe, J A Sa Ferreira, L M Villar** (2013//). Simultaneous detection of hepatitis C virus antigen and antibodies in dried blood spots. *Journal of clinical virology : the official publication of the Pan American Society for Clinical Virology*, 57(2), 98

**C Payan, F Bloch, I Gaultier, L Belec** (1995//). Single-step reverse transcription-polymerase chain reaction for hepatitis C virus RNA with DNA enzyme immunoassay hybridization. *Journal of virological methods*, 53(2-3), 167

**C Prezzi, M A Casciaro, V Francavilla, E Schiaffella, L Finocchi, L V Chircu, G Bruno, A Sette, S Abrignani, V Barnaba** (2001//). Virus-specific CD8(+) T cells with type 1 or type 2 cytokine profile are related to different disease activity in chronic hepatitis C virus infection. *European journal of immunology*, 31(3), 894

**C S Huang, M S Ho, C S Yang, C L Lee, C A Tan** (1993//). Hepatitis C markers in hemodialysis patients. *Journal of clinical microbiology*, 31(7), 1764

**C T Fang, S P Field, M P Busch, A du P Heyns** (2003//). Human immunodeficiency virus-1 and hepatitis C virus RNA among South African blood donors: estimation of residual transfusion risk and yield of nucleic acid testing. *Vox sanguinis*, 85(1), 9

**C T Yeh, C M Han, S Y Lo, J H Ou, K D Fan, I S Sheen, C M Chu, Y F Liaw** (1994//). Early detection of anti-HCc antibody in acute hepatitis C virus (HCV) by western blot (immunoblot) using a recombinant HCV core protein fragment. *Journal of clinical microbiology*, 32(9), 2235

**C Trepo, A M Courouze, L Noel** (1990//). [Discovery of the hepatitis C virus]. *Presse medicale (Paris, France : 1983)*, 19(34), 1582

**C Trepo, C Alonso, J S Li, D Qu, F Laurent, L Vitvitski** (1994//). [Limits of immunoserologic and molecular diagnosis of hepatitis C]. *Nuclear medicine and biology*, 21(3), 419

**C W Carson, D L Conn, A J Czaja, T L Wright, M E Brecher** (1993//). Frequency and significance of antibodies to hepatitis C virus in polyarteritis nodosa. *The Journal of rheumatology*, 20(2), 304

**Carlos Madrid, Bruno Courtois, Damien Duran** (2004//). Chronic Sialadenitis revealing hepatitis C: a case report. *Medicina oral : organo oficial de la Sociedad Espanola de Medicina Oral y de la Academia Iberoamericana de Patologia y Medicina Bucal*, 9(4), 328

**Carolyn Edler, Birgit Wulff, Ann-Sophie Schroder, Ina Wilkemeyer, Susanne Polywka, Thomas Meyer, Ulrich Kalus, Axel Pruss** (2011//). A prospective time-course study on serological testing for human immunodeficiency virus, hepatitis B virus and hepatitis C virus with blood samples taken up to 48 h after death. *Journal of medical microbiology*, 60(Pt 7), 920

**Caroline Aparicio, Thomas Mourez, Guy Simoneau, Jean-Dominique Magnier, Bertrand Galichon, Patrick Plaisance, Jean-Francois Bergmann, Pierre Sellier** (2012//). [Proposal of HIV, HBV and HCV targeted screening: short period feasibility study in a free-access outpatient medical structure]. *Presse medicale (Paris, France : 1983)*, 41(10), e517

**Cem Cengiz, Ulus S Akarca, Erdem Goker, Gul Yuce** (2003//). Detection of mutant p53 in hepatocellular cancer from Turkey and its

correlation with clinicopathologic parameters. *Digestive diseases and sciences*, 48(5), 865

**Chao-Jun Hu, Guang Song, Wei Huang, Guo-Zhen Liu, Chui-Wen Deng, Hai-Pan Zeng, Li Wang, Feng-Chun Zhang, Xuan Zhang, Jun Seop Jeong, Seth Blackshaw, Li-Zhi Jiang, Heng Zhu, Lin Wu, Yong-Zhe Li** (2012//). Identification of new autoantigens for primary biliary cirrhosis using human proteome microarrays. *Molecular & cellular proteomics : MCP*, 11(9), 669

**Chen-Ji Huang, Hwei-Ling Peng, Chih-Yu Cheng** (2011//). Improving antigenicity of the recombinant hepatitis C virus core protein via random mutagenesis. *Journal of biomedicine & biotechnology*, 2011(#issue#), 359042

**Christian Molleken, Barbara Sitek, Corinna Henkel, Gereon Poschmann, Bence Sipos, Sebastian Wiese, Bettina Warscheid, Christoph Broelsch, Markus Reiser, Scott L Friedman, Ida Tornoe, Anders Schlosser, Gunter Kloppel, Wolff Schmiegel, Helmut E Meyer, Uffe Holmskov, Kai Stuhler** (2009//). Detection of novel biomarkers of liver cirrhosis by proteomic analysis. *Hepatology (Baltimore, Md.)*, 49(4), 1257

**Christos Liaskos, Gary L Norman, Anargyros Moulas, Athanasios Garagounis, Ioannis Goulis, Eirini I Rigopoulou, George N Dalekos** (2010//). Prevalence of gastric parietal cell antibodies and intrinsic factor antibodies in primary biliary cirrhosis. *Clinica chimica acta; international journal of clinical chemistry*, 411(5-6), 411

**Chunfeng Wang, Lianfeng Zhang, Xuanmei Shen** (2013//). Development of a nucleic acid lateral flow strip for detection of hepatitis C virus (HCV) core antigen. *Nucleosides, nucleotides & nucleic acids*, 32(2), 59

**Cicioglu Aridogan Buket, Aynali Ayse, Kaya Selcuk, Onal Suleyman, Sesli Cetin Emel** (2014//). Comparison of HCV core antigen and anti-HCV with HCV RNA results. *African health sciences*, 14(4), 816

**Claude Tayou Tagny, Dora Mbanya, Edward L Murphy, Jean-Jacques Lefrere, Syria Laperche** (2014//). Screening for hepatitis C virus infection in a high prevalence country by an antigen/antibody combination assay versus a rapid test. *Journal of virological methods*, 199(#issue#), 119

**Claudia Matteucci, Roberta Sorrentino, Lia Bellis, Giuseppe Maria Ettore, Valentina Svicher, Roberto Santoro, Giovanni Vennarecci, Alessandra Biasiolo, Patrizia Pontisso, Daria Scacciarelli, Luca Beneduce, Cesare Sarrecchia,**

**Paolo Casalino, Sergio Bernardini, Pasquale Pierimarchi, Enrico Garaci, Claudio Puoti, Guido Rasi** (2014//). Detection of high levels of Survivin-immunoglobulin M immune complex in sera from hepatitis C virus infected patients with cirrhosis. *Hepatology research : the official journal of the Japan Society of Hepatology*, 44(9), 1008

**Clement Barjon, Toshiro Niki, Benjamin Verillaud, Paule Opolon, Pierre Bedossa, Mitsuomi Hirashima, Stephanie Blanchin, Michel Wassef, Hugo R Rosen, Anne-Sophie Jimenez, Ming Wei, Pierre Busson** (2012//). A novel monoclonal antibody for detection of galectin-9 in tissue sections: application to human tissues infected by oncogenic viruses. *Infectious agents and cancer*, 7(1), 16

**Cornelia Ottiger, Nicole Gygli, Andreas R Huber** (2013//). Detection limit of architect hepatitis C core antigen assay in correlation with HCV RNA, and renewed confirmation algorithm for reactive anti-HCV samples. *Journal of clinical virology : the official publication of the Pan American Society for Clinical Virology*, 58(3), 535

**D B Smith, F Davidson, P Simmonds** (1995//). Hepatitis C virus variants and the role of genotyping. *Journal of hepatology*, 23 Suppl 2(#issue#), 26

**D Brown, L Powell, A Morris, S Rassam, S Sherlock, N McIntyre, A J Zuckerman, G M Dusheiko** (1992//). Improved diagnosis of chronic hepatitis C virus infection by detection of antibody to multiple epitopes: confirmation by antibody to synthetic oligopeptides. *Journal of medical virology*, 38(3), 167

**D M Watts, A L Corwin, M A Omar, K C Hyams** (1994//). Low risk of sexual transmission of hepatitis C virus in Somalia. *Transactions of the Royal Society of Tropical Medicine and Hygiene*, 88(1), 55

**D M Wolk, M F Jones, J E Rosenblatt** (2001//). Laboratory diagnosis of viral hepatitis. *Infectious disease clinics of North America*, 15(4), 1109

**D Michael Strong, Louis Katz** (2002//). Blood-bank testing for infectious diseases: how safe is blood transfusion?. *Trends in molecular medicine*, 8(7), 355

**D N Amarapurkar, A Kumar, S Vaidya, P Murti, S K Bichile, R H Kalro, H G Desai** (1992//). Frequency of hepatitis B, C and D and human immunodeficiency virus infections in multi-transfused thalasseemics. *Indian journal of gastroenterology : official journal of the Indian Society of Gastroenterology*, 11(2), 80

**D P Bogdanos, G N Dalekos** (2008//). Enzymes as target antigens of liver-specific autoimmunity: the case of cytochromes P450s. *Current medicinal chemistry*, 15(22), 2285

**D R Gretch** (1997//). Diagnostic tests for hepatitis C. *Hepatology (Baltimore, Md.)*, 26(3 Suppl 1), 43S

**D Roth, J A Fernandez, S Babischkin, A De Mattos, B E Buck, S Quan, L Olson, G W Burke, J R Nery, V Esquenazi** (1992//). Detection of hepatitis C virus infection among cadaver organ donors: evidence for low transmission of disease. *Annals of internal medicine*, 117(6), 470

**D Saadoun, S Sadallah, M Trendelenburg, N Limal, D Sene, J C Piette, J A Schifferli, P Cacoub** (2006//). Anti-C1q antibodies in hepatitis C virus infection. *Clinical and experimental immunology*, 145(2), 308

**D Sansonno, G Lauletta, F Dammacco** (2004//). Detection and quantitation of HCV core protein in single hepatocytes by means of laser capture microdissection and enzyme-linked immunosorbent assay. *Journal of viral hepatitis*, 11(1), 27

**D Sene, P Ghillani-Dalbin, N Limal, V Thibault, T van Boekel, J-C Piette, P Cacoub** (2006//). Anti-cyclic citrullinated peptide antibodies in hepatitis C virus associated rheumatological manifestations and Sjogren's syndrome. *Annals of the rheumatic diseases*, 65(3), 394

**D T Abdourakhmanov, A S Hasaev, F J Castro, J Guardia** (1998//). Epidemiological and clinical aspects of hepatitis C virus infection in the Russian Republic of Daghestan. *European journal of epidemiology*, 14(6), 549

**D Villalta, M G Alessio, M Tampoia, A Da Re, S Stella, M Da Re, R Tozzoli, N Bizzaro** (2009//). Accuracy of the first fully automated method for anti-cardiolipin and anti-beta2 glycoprotein I antibody detection for the diagnosis of antiphospholipid syndrome. *Annals of the New York Academy of Sciences*, 1173(#issue#), 21

**D Y Chien, Q L Choo, A Tabrizi, C Kuo, J McFarland, K Berger, C Lee, J R Shuster, T Nguyen, D L Moyer** (1992//). Diagnosis of hepatitis C virus (HCV) infection using an immunodominant chimeric polyprotein to capture circulating antibodies: reevaluation of the role of HCV in liver disease. *Proceedings of the National Academy of Sciences of the United States of America*, 89(21), 10011

**Dale M Netski, Tim Mosbrugger, Erik Depla, Geert Maertens, Stuart C Ray, Robert G**

**Hamilton, Stacy Roundtree, David L Thomas, Jane McKeating, Andrea Cox** (2005//). Humoral immune response in acute hepatitis C virus infection. *Clinical infectious diseases : an official publication of the Infectious Diseases Society of America*, 41(5), 667

**Dale M Netski, Xiao-Hong Wang, Shruti H Mehta, Kenrad Nelson, David Celentano, Satawat Thongsawat, Niwat Maneekarn, Vinai Suriyanon, Jaroon Jittiwutikorn, David L Thomas, John R Ticehurst** (2004//). Hepatitis C virus (HCV) core antigen assay to detect ongoing HCV infection in thai injection drug users. *Journal of clinical microbiology*, 42(4), 1631

**Damien Lucidarme, Anne Decoster, Catherine Delamare, Christophe Schmitt, David Kozlowski, Jean Harbonnier, Claude Jacob, Christian Cyran, Gerard Forzy, Christine Defer, Daniele Ilef, Julien Emmanuelli, Bernard Filoche** (2003//). [An inter-laboratory study of anti-HCV antibody detection in saliva samples]. *Gastroenterologie clinique et biologique*, 27(2), 159

**Danilo Villalta, Maria G Mytilinaiou, Martina Elsner, Christian Hentschel, Juliane Cuccato, Valentina Somma, Peter Schierack, Dirk Roggenbuck, Dimitrios P Bogdanos** (2015//). Autoantibodies to asialoglycoprotein receptor (ASGPR) in patients with autoimmune liver diseases. *Clinica chimica acta; international journal of clinical chemistry*, 450(#issue#), 1

**Danilo Villalta, Nicola Bizzaro, Mirella Da Re, Renato Tozzoli, Lars Komorowski, Elio Tonutti** (2008//). Diagnostic accuracy of four different immunological methods for the detection of anti-F-actin autoantibodies in type 1 autoimmune hepatitis and other liver-related disorders. *Autoimmunity*, 41(1), 105

**David D Kim, David W Hutton, Ahmed A Raouf, Mohsen Salama, Ahmed Hablas, Ibrahim A Seifeldin, Amr S Soliman** (2015//). Cost-effectiveness model for hepatitis C screening and treatment: Implications for Egypt and other countries with high prevalence. *Global public health*, 10(3), 296

**David J Woollard, Gholamreza Haqshenas, Xuebin Dong, Bridget F Pratt, Stephen J Kent, Eric J Gowans** (2008//). Virus-specific T-cell immunity correlates with control of GB virus B infection in marmosets. *Journal of virology*, 82(6), 3054

**Delphine Desbois, Parissa Vaghefi, Jeanine Savary, Elisabeth Dussaix, Anne-Marie Roque-Afonso** (2008//). Sensitivity of a rapid immunochromatographic test for hepatitis C antibodies

detection. *Journal of clinical virology : the official publication of the Pan American Society for Clinical Virology*, 41(2), 129

**Delphine Feron, Cathy Charlier, Victor Gourain, Laurent Garderet, Marianne Coste-Burel, Patrice Le Pape, Pierre Weigel, Yannick Jacques, Sylvie Hermouet, Edith Bigot-Corbel** (2013//). Multiplexed infectious protein microarray immunoassay suitable for the study of the specificity of monoclonal immunoglobulins. *Analytical biochemistry*, 433(2), 202

**Dennis G Fisher, Kristen L Hess, Erlyana Erlyana, Grace L Reynolds, Catherine A Cummins, Todd A Alonzo** (2015//). Comparison of Rapid Point-of-Care Tests for Detection of Antibodies to Hepatitis C Virus. *Open forum infectious diseases*, 2(3), ofv101

**Domenico Sansonno, Sabino Russi, Silvia Sansonno, Fabio Pavone, Franco Dammacco** (2015//). Thymic stromal lymphopoietin in hepatitis C virus-related cryoglobulinemic vasculitis: gene expression level and protein distribution. *Arthritis research & therapy*, 17(#issue#), 62

**Douglas Lienesch, Robert Morris, Allan Metzger, Paige Debuys, Kenneth Sherman** (2005//). Absence of cyclic citrullinated peptide antibody in nonarthritic patients with chronic hepatitis C infection. *The Journal of rheumatology*, 32(3), 489

**Dragica Terzic, Branko Brmbolic, Djordje Singer, Brankica Dupanovic, Milos Korac, Dubravka Selemovic, Neda Svirtlih, Nenad Draskovic, Boban Mugosa, Ivan Boricic, Zoran Terzic** (2008//). Liver enlargement associated with opportunistic infections in patients with human immunodeficiency virus infection. *Journal of gastrointestinal and liver diseases : JGLD*, 17(4), 401

**Dror D Siman-Tov, Romy Zemel, Ran Tur Kaspas, Jonathan M Gershoni** (2013//). The use of epitope arrays in immunodiagnosis of infectious disease: hepatitis C virus, a case study. *Analytical biochemistry*, 432(2), 63

**Da Costa A.N., Plymouth A., Santos-Silva D., Ortiz-Cuaran S., Camey S., Guilloureau P., Sangrajrang S., Khuhaprema T., Mendy M., Lesi O.A., Chang H.-K., Oh J.-K., Lee D.-H., Shin H.-R., Kirk G.D., Merle P., Beretta L., Hainaut P.** (2015//). Osteopontin and latent-TGF beta binding-protein 2 as potential diagnostic markers for HBV-related hepatocellular carcinoma *International Journal of Cancer*, 136(1), 172

**Dahle J., Schagemann G., Moennig V., Liess B.** (1993//). Clinical, virological and serological

findings after intranasal inoculation of pigs with bovine viral diarrhoea virus and subsequent intranasal challenge with hog cholera virus *Zentralblatt fur Veterinarmedizin. Reihe B. Journal of veterinary medicine. Series B*, 40(1), 46

**Dalekos G.N., Manoussakis M.N., Zervou E., Tsianos E.V., Moutsopoulos H.M.** (1993//). Immunologic and viral markers in the circulation of anti-HIV negative heroin addicts *European Journal of Clinical Investigation*, 23(4), 219

**Dao T., Lecoite I., Galateau F., Freymuth F., Rideau A., Verwaerde J.-C., Valla A.** (1993//). Contribution of liver biopsy and hepatitis B virus antibodies to the diagnosis of persistent and moderate elevation of aminotransferases *Gastroenterologie Clinique et Biologique*, 17(1), 37

**Das S., Harendra Kumar M.L.** (2012//). Viral hepatitis among the blood donors in a rural based hospital: A five year study *Journal of Clinical and Diagnostic Research*, 6(4 SUPPL. 2), 619

**Das U., Kar P., Gopalkrishna V., Sharma J.K., Madan K., Das B.C.** (1999//). Comparative evaluation of hepatitis C virus infection in serum and liver tissue of patients with chronic liver disease by reverse transcription-polymerase chain reaction *Clinical Microbiology and Infection*, 5(5), 256

**De Medina M., Hill M., Sullivan H.O., Leclercq B., Pennell J.P., Jeffers L., Reddy K.R., Schiff E.R., Perez G.O.** (1998//). Detection of anti-hepatitis C virus antibodies in patients undergoing dialysis by utilizing a hepatitis C virus 3,0 assay: Correlation with hepatitis C virus RNA *Journal of Laboratory and Clinical Medicine*, 132(1), 73

**De Souza V.A.U.F., Sumita L.M., Nascimento M.-C., Oliveira J., Mascheretti M., Quiroga M., Freire W.S., Tateno A., Boulos M., Mayaud P., Pannuti C.S.** (2007//). Human herpesvirus-8 infection and oral shedding in Amerindian and non-Amerindian populations in the Brazilian Amazon Region *Journal of Infectious Diseases*, 196(6), 844

**Derbala M., Rizk N., Shebl F., Alkaabi S., Eldweik N., John A., Sharma M., Yaqoob R., Almohanadi M., Butt M., Alejji K.** (2012//). Interleukin-28 and hepatitis C virus genotype-4: Treatment-induced clearance and liver fibrosis *World Journal of Gastroenterology*, 18(47), 7003

**Ding J., Takada A., Yamada N., Tsutsumi M., Date T.** (1998//). Study of hepatitis C virus genotype in Guizhou area of southwestern China *Chinese Medical Journal*, 111(2), 128

**Ding J., Yi Y., Su Q., Qiu F., Jia Z., Bi S.** (2014//). High



expression of small hepatitis D antigen in *Escherichia coli* and ELISA for diagnosis of hepatitis D virus *Journal of Virological Methods*, 197(#issue#), 34

**Dipti C.A.,Jain S.K.,Navin K.** (2006//). A novel recombinant multi-epitope protein as a hepatitis C diagnostic intermediate of high sensitivity and specificity *Protein Expression and Purification*, 47(1), 319

**Djebbi A.,Sadraoui A.,Triki H.** (2003//). Comparison of different methods for genotyping hepatitis C virus *Annales de Biologie Clinique*, 61(6), 689

**Dou J.,Liu K.,Chen Z.,Wo J.,He N.,Liu Y.,Zhang M.,Wang X.,Xu C.** (1999//). Effect of immunization in mice with recombinant DNA encoding the hepatitis C virus structural protein *Chinese medical journal*, 112(11), 1036

**Dow B.C.** (1999//). Microbiology confirmatory tests for blood donors *Blood Reviews*, 13(2), 91

**Dow D.C.** (2000//). 'Noise' in microbiological screening assays *Transfusion Medicine*, 10(2), 97

**Dubois F.,Barin F.,Goudeau A.** (1998//). Anti-HCV immunoblot: Its use for confirmation of initial screening and follow-up of hepatitis C infection *Annales de Biologie Clinique*, 56(4), 417

**Dumaidi K.,Al-Jawabreh A.** (2014//). Prevalence of occult HBV among hemodialysis patients in two districts in the northern part of the West Bank, Palestine *Journal of medical virology*, 86(10), 1694

**Dumestre-Perard C.,Ponard D.,Drouet C.,Leroy V.,Zarski J.-P.,Dutertre N.,Colomb M.G.** (2002//). Complement C4 monitoring in the follow-up of chronic hepatitis C treatment *Clinical and Experimental Immunology*, 127(1), 131

**Durand F.,Danic B.,Tardivel R.,Semana G.,Gouezec H.,Martinot M.,Marcellin P.,Beauplet A.** (2000//). Detection of an HCV chronic carrier state without anti-HCV antibody in a blood donor during 28 months *Transfusion Clinique et Biologique*, 7(3), 242

**Dwyer R.** (2004//). The ADVIA Centaur infectious disease assays: A technical review *Journal of Clinical Virology*, 30(SUPPL. 1), S1

**Edelenyi-Pinto M.,Carvalho A.P.,Nogueira C.,Ferreira Junior O.,Schechter M.** (1993//). Prevalence of antibodies to hepatitis C virus in populations at low and high risk for sexually transmitted diseases in Rio de Janeiro *Memorias do Instituto Oswaldo Cruz*, 88(2), 305

**Ehrnsperger M.,Hergersberg C.,Wienhues U.,Nichtl A.,Buchner J.** (1998//). Stabilization of proteins and peptides in diagnostic immunological assays by the molecular chaperone Hsp25 *Analytical Biochemistry*, 259(2), 218

**Eissa S.,Swellam M.,El Ahmady O.,Hamdy H.,Youssef M.,Khalifa A.** (2002//). Clinical significance of circulating p53 autoantibodies in hepatocellular carcinoma and chronic HCV patients in relation to AFP and ferritin levels *Cancer Molecular Biology*, 9(1), 1773

**El Aggan H.A.,Sidkey F.,El Gezery D.A.,Ghoneim E.** (2004//). Circulating anti-HLA antibodies in patients with chronic hepatitis C: relation to disease activity *The Egyptian journal of immunology / Egyptian Association of Immunologists*, 11(2), 71

**El Bassuoni M.A.,Obada M.A.,Korah T.,El Sayed S.** (2008//). Assessment of Treg cells CD4+CD25+ in chronic cirrhotic liver disease and hepatocellular carcinoma Egyptian patients *Hepatitis Monthly*, 8(3), 173

**El-Gindy I.,El Rahman A.T.,El-Alim M.A.,Zaki S.S.** (2003//). Diagnostic potential of serum matrix metalloproteinase-2 and tissue inhibitor of metalloproteinase-1 as non-invasive markers of hepatic fibrosis in patients with HCV related chronic liver disease *The Egyptian journal of immunology / Egyptian Association of Immunologists*, 10(1), 27

**el-Kady I.M.,el-Masry S.A.,Badra G.,Halafawy K.A.** (2004//). Different cytokine patterns in patients coinfecting with hepatitis C virus and *Schistosoma mansoni* *The Egyptian journal of immunology / Egyptian Association of Immunologists*, 11(1), 23

**El-Kamary S.S.,Hashem M.,Saleh D.A.,Abdelwahab S.F.,Sobhy M.,Shebl F.M.,Shardell M.D.,Strickland G.T.,Shata M.T.** (2013//). Hepatitis C virus-specific cell-mediated immune responses in children born to mothers infected with hepatitis C virus *Journal of Pediatrics*, 162(1), 148

**el-Sayed Zaki M.,el-Adrosy H.** (2004//). Recent approach for diagnosis of early HCV infection *The Egyptian journal of immunology / Egyptian Association of Immunologists*, 11(1), 123

**El-Zefzafy W.,Eltokhy H.,El-Ghaffar Mohamed N.A.,Abu-Zahab Z.** (2015//). Significance of serum cytokeratin-18 in prediction of hepatocellular carcinoma in chronic hepatitis C infected Egyptian patients *Macedonian Journal of Medical Sciences*, 3(1), 117

**Elbouaishi A., Rhoma N., Turki M., Fituri O., Elbousaife A., Grera A.** (2010//). Nephrotic syndrome in Libyan children *Jamahiriya Medical Journal*, 10(3), 199

**Eldin S.S., Seddik I., Daef E.A., Shata M.T., Raafat M., Abdel Baky L., Nafeh M.A.** (2010//). Risk factors and immune response to hepatitis E viral infection among acute hepatitis patients in Assiut, Egypt *The Egyptian journal of immunology / Egyptian Association of Immunologists*, 17(1), 73

**Elgohry I., Elbanna A., Hashad D.** (2012//). Occult hepatitis B virus infection in a cohort of Egyptian chronic hemodialysis patients *Clinical Laboratory*, 58(9-10), 1057

**Elira Dokekias A., Okandze-Elenga J.P., Gouary Kinkouna A.S., Bokilo Dzia Lefpoundzou A., Garcia S.** (2003//). Seroprevalence of viral hepatitis C in multitransfused patients at university hospital of Brazzaville *Bulletin de la Societe de Pathologie Exotique*, 96(4), 279

**Elkayam O., Segal R., Bendayan D., van Uitert R., Onnekink C., Pruijn G.J.M.** (2010//). The anti-cyclic citrullinated peptide response in tuberculosis patients is not citrulline-dependent and sensitive to treatment *Arthritis Research and Therapy*, 12(1), no pagination

**Elzouki A.-N.Y., Gargoum H.M., Habas E.M., Rayani A.A., Othman M.** (2014//). Impact of hepatitis C infection on renal transplant patients: a single-center experience in Libya *Saudi journal of kidney diseases and transplantation : an official publication*

**E A Beckers, P M Thijssen, T Nijdam, D J Van Rhenen** (1994//). Evaluation of anti-HCV ELISA seropositivity in voluntary blood donors: a proposal for donor counseling strategies. *Infusionstherapie und Transfusionsmedizin*, 21(3), 143

**E A Gudim, I I Agapov, I S Komolov, A G Tonevitskii** (2005//). Humoral immune response to recombinant viral NS3 protein in patients with hepatitis C. *Bulletin of experimental biology and medicine*, 139(1), 77

**E Ballot, J C Homberg, C Johanet** (2000//). Antibodies to soluble liver antigen: an additional marker in type 1 auto-immune hepatitis. *Journal of hepatology*, 33(2), 208

**E Buratti, M Di Michele, P Song, C Monti-Bragadin, E A Scodeller, F E Baralle, S G Tisminetzky** (1997//). Improved reactivity of hepatitis C virus core protein epitopes in a conformational antigen-presenting system. *Clinical*

*and diagnostic laboratory immunology*, 4(2), 117

**E Farma, E Boeri, P Bettini, C M Repetto, J McDermott, F B Lillo, O E Varnier** (1996//). Single-step PCR in molecular diagnosis of hepatitis C virus infection. *Journal of clinical microbiology*, 34(12), 3171

**E Gobin, J M Desruelle, J P Vigier** (2001//). [Evaluation of the analytic performance of blood collection tubes (BD Vacutainer SST) for the screening of anti-HIV, anti-HTLV, anti-HCV, anti-HBc, anti-CMV antibodies, and of HBs, P24 HIV antigens, and of alanine aminotransferase]. *Transfusion clinique et biologique : journal de la Societe francaise de transfusion sanguine*, 8(1), 44

**E H Frost** (1993//). Investigation of sera reactive to hepatitis C virus by second-generation enzyme immunoassay. *Journal of clinical microbiology*, 31(1), 163

**E J Gordon, R Bhat, Q Liu, Y F Wang, C Tackney, A M Prince** (2000//). Immune responses to hepatitis C virus structural and nonstructural proteins induced by plasmid DNA immunizations. *The Journal of infectious diseases*, 181(1), 42

**E Jirillo, N M Pellegrino, G Piazzolla, D Caccavo, S Antonaci** (2000//). Hepatitis C virus infection: immune responsiveness and interferon-alpha treatment. *Current pharmaceutical design*, 6(2), 169

**E K Kolho, T Krusius** (1992//). Risk factors for hepatitis C virus antibody positivity in blood donors in a low-risk country. *Vox sanguinis*, 63(3), 192

**E Kainne Dokubo, Jennifer Evans, Valerie Winkelman, Sherri Cyrus, Leslie H Tobler, Alice Asher, Alya Briceno, Kimberly Page** (2014//). Comparison of Hepatitis C Virus RNA and antibody detection in dried blood spots and plasma specimens. *Journal of clinical virology : the official publication of the Pan American Society for Clinical Virology*, 59(4), 223

**E Kocabas, N Aksaray, E Alhan, F Yarkin, F Koksall, Y Kilinc** (1997//). Hepatitis B and C virus infections in Turkish children with haemophilia. *Acta paediatrica (Oslo, Norway : 1992)*, 86(10), 1135

**E Kolho, R Naukkarinen, T Krusius** (1992//). Specificity and sensitivity of two second-generation ELISA tests in detecting hepatitis C antibodies in blood donors known to be reactive with a supplemental assay. *Vox sanguinis*, 63(2), 158

**E Kovalenko, F Tacke, O A Gressner, H W Zimmermann, B Lahme, A Janetzko, T**

**Wiederholt, T Berg, T Muller, C Trautwein, A M Gressner, R Weiskirchen** (2009//). Validation of connective tissue growth factor (CTGF/CCN2) and its gene polymorphisms as noninvasive biomarkers for the assessment of liver fibrosis. *Journal of viral hepatitis*, 16(9), 612

**E Kurstak, C Kurstak, A Hossain, A Al Tuwaijri** (1995//). Current status of the molecular genetics of hepatitis C virus and its utilization in the diagnosis of infection. *Clinical and diagnostic virology*, 3(1), 1

**E L Leikin, J F Reinus, E Schmall, N Tejani** (1994//). Epidemiologic predictors of hepatitis C virus infection in pregnant women. *Obstetrics and gynecology*, 84(4), 529

**E L Murphy, S Bryzman, A E Williams, H Co-Chien, G B Schreiber, H E Ownby, R O Gilcher, S H Kleinman, L Matijas, R A Thomson, G J Nemo** (1996//). Demographic determinants of hepatitis C virus seroprevalence among blood donors. *JAMA*, 275(13), 995

**E Lawlor, J Power, J Garson, P Yap, F Davidson, G Columb, D Smith, L Pomeroy, J O'Riordan, P Simmonds, R Tedder** (1999//). Transmission rates of hepatitis C virus by different batches of a contaminated anti-D immunoglobulin preparation. *Vox sanguinis*, 76(3), 138

**E M Bloch, A Shah, Z Kaidarova, S Laperche, J-J Lefrere, J van Hasselt, P Zacharias, E L Murphy, Anglophone Africa Transfusion Research Group** (2014//). A pilot external quality assurance study of transfusion screening for HIV, HCV and HBsAG in 12 African countries. *Vox sanguinis*, 107(4), 333

**E Orito, M Mizokami, T Tanaka, J Y Lau, K Suzuki, M Yamauchi, Y Ohta, A Hasegawa, S Tanaka, M Kohara** (1996//). Quantification of serum hepatitis C virus core protein level in patients chronically infected with different hepatitis C virus genotypes. *Gut*, 39(6), 876

**E R Schiff, M de Medina, R S Kahn** (1999//). New perspectives in the diagnosis of hepatitis C. *Seminars in liver disease*, 19 Suppl 1(#issue#), 3

**E Tanaka, C Ohue, K Aoyagi, K Yamaguchi, S Yagi, K Kiyosawa, H J Alter** (2000//). Evaluation of a new enzyme immunoassay for hepatitis C virus (HCV) core antigen with clinical sensitivity approximating that of genomic amplification of HCV RNA. *Hepatology (Baltimore, Md.)*, 32(2), 388

**E Tanaka, K Kiyosawa, A Matsumoto, T Kashiwakuma, A Hasegawa, H Mori, O Yanagihara, Y Ohta** (1996//). Serum levels of

hepatitis C virus core protein in patients with chronic hepatitis C treated with interferon alfa. *Hepatology (Baltimore, Md.)*, 23(6), 1330

**E Tanaka, K Kiyosawa, T Seki, A Matsumoto, T Sodeyama, S Furuta, T Kumagai, M Kohara** (1993//). Low prevalence of hepatitis C virus infection in patients with auto-immune hepatitis type 1. *Journal of gastroenterology and hepatology*, 8(5), 442

**E Tanaka, M Tacke, M Kobayashi, Y Nakatsuji, K Kiyosawa, S Schmolke, A M Engel, G Hess, H J Alter** (1998//). Past and present hepatitis G virus infections in areas where hepatitis C is highly endemic and those where it is not endemic. *Journal of clinical microbiology*, 36(1), 110

**E Vardas, F Sitas, K Seidel, A Casteling, J Sim** (1999//). Prevalence of hepatitis C virus antibodies and genotypes in asymptomatic, first-time blood donors in Namibia. *Bulletin of the World Health Organization*, 77(12), 965

**E Zucca, E Roggero, N Maggi-Solca, A Conconi, F Bertoni, I Reilly, D Castelli, E Pedrinis, J C Piffaretti, F Cavalli** (2000//). Prevalence of *Helicobacter pylori* and hepatitis C virus infections among non-Hodgkin's lymphoma patients in Southern Switzerland. *Haematologica*, 85(2), 147

**E Zuckerman, T Zuckerman, A M Levine, D Douer, K Gutekunst, M Mizokami, D G Qian, M Velankar, B N Nathwani, T L Fong** (1997//). Hepatitis C virus infection in patients with B-cell non-Hodgkin lymphoma. *Annals of internal medicine*, 127(6), 423

**Edgar D Charles, Michael I M Orloff, Eiko Nishiuchi, Svetlana Marukian, Charles M Rice, Lynn B Dustin** (2013//). Somatic hypermutations confer rheumatoid factor activity in hepatitis C virus-associated mixed cryoglobulinemia. *Arthritis and rheumatism*, 65(9), 2430

**Edith Hintermann, Martin Holdener, Monika Bayer, Stephanie Loges, Josef M Pfeilschifter, Claude Granier, Michael P Manns, Urs Christen** (2011//). Epitope spreading of the anti-CYP2D6 antibody response in patients with autoimmune hepatitis and in the CYP2D6 mouse model. *Journal of autoimmunity*, 37(3), 242

**Edna Maria Vissoci Reiche, Ingridt Hildegard Vogler, Helena Kaminami Morimoto, Andre Luis Bortoliero, Tiemi Matsuo, Katia Kioko Yuahasi, Sanderson Junior Cancian, Roberto Setsuo Koguichi** (2003//). Evaluation of surrogate markers for human immunodeficiency virus infection among blood donors at the blood bank of "Hospital Universitario Regional Norte do Parana",

Londrina, PR, Brazil. *Revista do Instituto de Medicina Tropical de Sao Paulo*, 45(1), 23

**Edouard Tuaille, Anne-Marie Mondain, Fadi Meroueh, Laure Ottomani, Marie-Christine Picot, Nicolas Nagot, Philippe Van de Perre, Jacques Ducos** (2010//). Dried blood spot for hepatitis C virus serology and molecular testing. *Hepatology (Baltimore, Md.)*, 51(3), 752

**Eirini I Rigopoulou, Ioannis Stefanidis, Christos Liaskos, Eleftheria K Zervou, Christos Rizos, Paraskevi Mina, Kalliopi Zachou, Christos Syrganis, Eftichios Patsidis, George Kyriakopoulos, Lambros Sdrakas, Nikolaos Tsianas, Georgios N Dalekos** (2005//). HCV-RNA qualitative assay based on transcription mediated amplification improves the detection of hepatitis C virus infection in patients on hemodialysis: results from five hemodialysis units in central Greece. *Journal of clinical virology : the official publication of the Pan American Society for Clinical Virology*, 34(1), 81

**Eirini I Rigopoulou, Maria Mytilinaiou, Ourania Romanidou, Christos Liaskos, George N Dalekos** (2007//). Autoimmune hepatitis-specific antibodies against soluble liver antigen and liver cytosol type 1 in patients with chronic viral hepatitis. *Journal of autoimmune diseases*, 4(#issue#), 2

**Eishiro Mizukoshi, Michelina Nascimbeni, Joshua B Blaustein, Kathleen Mihalik, Charles M Rice, T Jake Liang, Stephen M Feinstone, Barbara Rehermann** (2002//). Molecular and immunological significance of chimpanzee major histocompatibility complex haplotypes for hepatitis C virus immune response and vaccination studies. *Journal of virology*, 76(12), 6093

**Elena Bartoloni, Alessia Alunno, Onelia Bistoni, Nicola Bizzaro, Paola Migliorini, Gabriella Morozzi, Andrea Doria, Alessandro Mathieu, Milvia Lotzniker, Flavio Allegri, Valeria Ricciari, Claudia Alpini, Armando Gabrielli, Marilina Tampoia, Roberto Gerli, Forum Interdisciplinare per la Ricerca nelle Malattie Autoimmuni (FIRMA) investigators** (2012//). Diagnostic value of anti-mutated citrullinated vimentin in comparison to anti-cyclic citrullinated peptide and anti-viral citrullinated peptide 2 antibodies in rheumatoid arthritis: an Italian multicentric study and review of the literature. *Autoimmunity reviews*, 11(11), 815

**Ellen Heck, Allen Brown, H Dwight Cavanagh** (2013//). Nucleic acid testing and tissue safety: an eye bank's five-year review of HIV and hepatitis testing for donor corneas. *Cornea*, 32(4), 503

**Elyanne Gault, Patrick Soussan, Yoann Morice, Lara Sanders, Assia Berrada, Brian Rogers, Paul Deny** (2003//). Evaluation of a new serotyping assay for detection of anti-hepatitis C virus type-specific antibodies in serum samples. *Journal of clinical microbiology*, 41(5), 2084

**Emiko Hayashi, Yutaka Motomura, Hirofumi Shirakawa, Toshiaki Yoshikawa, Nobuyuki Oba, Shuta Nishinakagawa, Yasuhiro Mizuguchi, Tatsuya Kojima, Kazuhiro Nomura, Tetsuya Nakatsura** (2009//). Detection of glypican-3-specific CTLs in chronic hepatitis and liver cirrhosis. *Oncology reports*, 22(1), 149

**Emma C Thomson, Eleni Nastouli, Janice Main, Peter Karayiannis, Joseph Eliahoo, David Muir, Myra O McClure** (2009//). Delayed anti-HCV antibody response in HIV-positive men acutely infected with HCV. *AIDS (London, England)*, 23(1), 89

**Emmanuel Nna, Chinenye Mbamalu, Ifeoma Ekejindu** (2014//). Occult hepatitis B viral infection among blood donors in South-Eastern Nigeria. *Pathogens and global health*, 108(5), 223

**Erdem Akbal, Seyfettin Koklu, Erdem Kocak, Basak Cakal, Fahri Gunes, Omer Basar, Yasar Tuna, Mehmet Senes** (2013//). Liver fatty acid-binding protein is a diagnostic marker to detect liver injury due to chronic hepatitis C infection. *Archives of medical research*, 44(1), 34

**Erin Wigglesworth, Alan Heath, Harvey Holmes** (2010//). Development of a World Health Organisation International Reference Panel for Anti-HIV. *Journal of virological methods*, 163(1), 101

**Erman Timurdogan, B Erdem Alaca, I Halil Kavakli, Hakan Urey** (2011//). MEMS biosensor for detection of Hepatitis A and C viruses in serum. *Biosensors & bioelectronics*, 28(1), 189

**Essam M Elsawy, Mohamed A Sobh, Farha A El-Chenawi, Ihab M Hassan, Ahmad B Shehab El-Din, Mohamed A Ghoneim** (2005//). Serotyping of hepatitis C virus in hemodialysis patients: comparison with a standardized genotyping assay. *Diagnostic microbiology and infectious disease*, 51(2), 91

**Eva A Operskalski, James W Mosley, Leslie H Tobler, Eberhard W Fiebig, Marek J Nowicki, Larry T Mimms, James Gallarda, Bruce H Phelps, Michael P Busch, Transfusion-Transmitted Viruses Study, Retrovirus Epidemiology Donor Study** (2003//). HCV viral load in anti-HCV-reactive donors and infectivity for their recipients. *Transfusion*, 43(10), 1433

- Everton Hadlich, Mario Reis Alvares-Da-Silva, Rafaela Komorowski Dal Molin, Raquel Zenker, Luciano Zubaran Goldani** (2007//). Hepatitis C virus (HCV) viremia in HIV-infected patients without HCV antibodies detectable by third-generation enzyme immunoassay. *Journal of gastroenterology and hepatology*, 22(9), 1506
- F Cassani, L Muratori, P Manotti, M Lenzi, M Fusconi, G Ballardini, L Selleri, U Volta, D Zauli, R Miniero** (1992//). Serum autoantibodies and the diagnosis of type-1 autoimmune hepatitis in Italy: a reappraisal at the light of hepatitis C virus infection. *Gut*, 33(9), 1260
- F Cassani, P Valentini, M Cataleta, P Manotti, R Francesconi, F Giostra, G Ballardini, M Lenzi, D Zauli, F B Bianchi** (1997//). Ultrasound-detected abdominal lymphadenopathy in chronic hepatitis C: high frequency and relationship with viremia. *Journal of hepatology*, 26(3), 479
- F Dammacco, D Sansonno, A Beardsley, E J Gowans** (1993//). Failure to detect hepatitis C virus (HCV) genome by polymerase chain reaction in human anti-HCV-positive intravenous immunoglobulins. *Clinical and experimental immunology*, 92(2), 205
- F De Filippi, M Fraquelli, D Conte, R Soffredini, D Prati, G Ronchi, A Zanella, E Del Ninno, M Colombo** (1998//). High prevalence but low pathogenicity of hepatitis G virus infection in Italian patients with genetic haemochromatosis. *Italian journal of gastroenterology and hepatology*, 30(5), 529
- F Dubois, F Barin, A Goudeau** (1998//). [Anti-HCV serology for screening, diagnosis and surveillance of hepatitis C: role of the immunoblot]. *Annales de biologie clinique*, 56(4), 417
- F Durand, B Danic, R Tardivel, G Semana, H Gouezec, M Martinot, P Marcellin, A Beauplet** (2000//). [Discovery of a chronic HVC infection without seroconversion in a blood donor in France during 28 months]. *Transfusion clinique et biologique : journal de la Societe francaise de transfusion sanguine*, 7(3), 242
- F E Preston, L M Jarvis, M Makris, L Philp, J C Underwood, C A Ludlam, P Simmonds** (1995//). Heterogeneity of hepatitis C virus genotypes in hemophilia: relationship with chronic liver disease. *Blood*, 85(5), 1259
- F Ebeling** (1991//). Alanine aminotransferase, gamma-glutamyltransferase, antibodies to hepatitis B core antigen and antibodies to hepatitis C virus in blood donor screening. A prospective study in Finland. *Vox sanguinis*, 60(4), 219
- F Ebeling, J Leikola** (1991//). Post-transfusion hepatitis. *Annals of medicine*, 23(4), 361
- F Fabrizi, G Lunghi, I Guarnori, L Raffaele, G Erba, A Pagano, F Locatelli** (1996//). IgM antibody response to hepatitis C virus in end-stage renal disease. *Nephrology, dialysis, transplantation : official publication of the European Dialysis and Transplant Association - European Renal Association*, 11(2), 314
- F Fabrizi, G Lunghi, I Guarnori, L Raffaele, S Di Filippo, G Erba, A Pagano, F Locatelli** (1995//). Virological characteristics of hepatitis C virus infection in chronic hemodialysis patients: a cross-sectional study. *Clinical nephrology*, 44(1), 49
- F Izzo, F Cremona, P Delrio, E Leonardi, G Castello, S Pignata, B Daniele, S A Curley** (1999//). Soluble interleukin-2 receptor levels in hepatocellular cancer: a more sensitive marker than alpha fetoprotein. *Annals of surgical oncology*, 6(2), 178
- F T al-Mahroos, A Ebrahim** (1995//). Prevalence of hepatitis B, hepatitis C and human immune deficiency virus markers among patients with hereditary haemolytic anaemias. *Annals of tropical paediatrics*, 15(2), 121
- Fabian C Franzeck, Ramadhani Ngwale, Bernadeta Msongole, Marian Hamisi, Omary Abdul, Lars Henning, Emilio Letang, Geoffrey Mwaigomole, Manuel Battegay, Christoph Hatz, Marcel Tanner** (2013//). Viral hepatitis and rapid diagnostic test based screening for HBsAg in HIV-infected patients in rural Tanzania. *PLoS one*, 8(3), e58468
- Fabrice Bonnet, Jean-Jacques Pineau, Jean-Luc Taupin, Anne Feyler, Mojgan Bonarek, Sten de Witte, Noelle Bernard, Denis Lacoste, Philippe Morlat, Jacques Beylot** (2003//). Prevalence of cryoglobulinemia and serological markers of autoimmunity in human immunodeficiency virus infected individuals: a cross-sectional study of 97 patients. *The Journal of rheumatology*, 30(9), 2005
- Fan Chen, Si-Chong Chen, Jing Zhou, Zhi-De Chen, Fang Chen** (2015//). Identification of aptamer-binding sites in hepatitis C virus envelope glycoprotein e2. *Iranian journal of medical sciences*, 40(1), 63
- Faris Q Alenzi, Eman M El-Nashar, Saad S Al-Ghamdi, Mohammed Y Abbas, Abubaker M Hamad, Osama M El-Saeed, Richard K H Wyse, Mahmoud Lotfy** (2010//). Original Article: Investigation of Bcl-2 and PCNA in Hepatocellular Carcinoma: Relation to Chronic HCV. *Journal of the*

*Egyptian National Cancer Institute*, 22(1), 87

**Feng Yang, Jason M Robotham, Henry Grise, Stephen Frausto, Vanesa Madan, Margarita Zayas, Ralf Bartenschlager, Margaret Robinson, Andrew E Greenstein, Anita Nag, Timothy M Logan, Ewa Bienkiewicz, Hengli Tang** (2010//). A major determinant of cyclophilin dependence and cyclosporine susceptibility of hepatitis C virus identified by a genetic approach. *PLoS pathogens*, 6(9), e1001118

**Feng-Bo Wu, Hai-Qiao Ouyan, Xiao-Yan Tang, Zhen-Xian Zhou** (2008//). Double-antigen sandwich time-resolved immunofluorometric assay for the detection of anti-hepatitis C virus total antibodies with improved specificity and sensitivity. *Journal of medical microbiology*, 57(Pt 8), 947

**Fengxiang Gao, Elizabeth A Talbot, Carol H Loring, Jill J Power, Jodie Dionne-Odom, Sharon Alroy-Preis, Patricia Jackson, Christine L Bean** (2014//). Performance of the OraQuick HCV rapid antibody test for screening exposed patients in a hepatitis C outbreak investigation. *Journal of clinical microbiology*, 52(7), 2650

**Fernando Herz Wolff, Sandra Costa Fuchs, Ajacio B M Brandao** (2011//). Absence of occult hepatitis B among blood donors in southern Brazil. *The Brazilian journal of infectious diseases : an official publication of the Brazilian Society of Infectious Diseases*, 15(2), 159

**Filippo Ansaldi, Bianca Bruzzone, Stefania Salmaso, Maria Cristina Rota, Paolo Durando, Roberto Gasparini, Giancarlo Icardi** (2005//). Different seroprevalence and molecular epidemiology patterns of hepatitis C virus infection in Italy. *Journal of medical virology*, 76(3), 327

**Flavia F Fernandes, Maria L Ferraz, Luiz E Andrade, Alessandra Dellavance, Carlos Terra, Gustavo Pereira, Joao L Pereira, Frederico Campos, Fatima Figueiredo, Renata M Perez** (2015//). Enhanced liver fibrosis panel as a predictor of liver fibrosis in chronic hepatitis C patients. *Journal of clinical gastroenterology*, 49(3), 235

**Florence Komurian-Pradel, Alain Rajoharison, Jean-Luc Berland, Valerie Khouri, Magali Perret, Mark Van Roosmalen, Stanislas Pol, Francesco Negro, Glaucia Paranhos-Baccala** (2004//). Antigenic relevance of F protein in chronic hepatitis C virus infection. *Hepatology (Baltimore, Md.)*, 40(4), 900

**Francesco Dati** (2004//). An update on laboratory productivity with infectious disease assays on the

Bayer ADVIA Centaur Immunoassay System. *Clinical laboratory*, 50(1-2), 53

**Francois Rouet, Marie-Laure Chaix, Andre Inwoley, Philippe Msellati, Ida Viho, Patrice Combe, Valerie Leroy, Francois Dabis, Christine Rouzioux, ANRS 1236 DITRAME-B&C Study Group** (2004//). HBV and HCV prevalence and viraemia in HIV-positive and HIV-negative pregnant women in Abidjan, Cote d'Ivoire: the ANRS 1236 study. *Journal of medical virology*, 74(1), 34

**Fumio Nomura, Kazuyuki Sogawa, Kenta Noda, Masanori Seimiya, Kazuyuki Matsushita, Toshihide Miura, Takeshi Tomonaga, Hideyuki Yoshitomi, Fumio Imazeki, Hiroataka Takizawa, Kaoru Mogushi, Masaru Miyazaki, Osamu Yokosuka** (2012//). Serum anti-Ku86 is a potential biomarker for early detection of hepatitis C virus-related hepatocellular carcinoma. *Biochemical and biophysical research communications*, 421(4), 837

**Fabregas B.C., Moura A.S., de Avila R.E., Faria M.N., Carmo R.A., Teixeira A.L.** (2014//). Sexual dysfunction and dissatisfaction in chronic hepatitis C patients *Revista da Sociedade Brasileira de Medicina Tropical*, 47(5), 564

**Fabrizi F., Poordad F.F., Martin P.** (2001//). Diagnostic workup of hepatitis C and the patient on maintenance dialysis *International Journal of Artificial Organs*, 24(12), 843

**Ferguson M.C.** (2011//). Current therapies for chronic hepatitis C *Pharmacotherapy*, 31(1), 92

**Fernando S., Fernando S.S., Sheriff M.H., Vitarana U.T.** (2001//). Antibodies to hepatitis C virus in patients who have had multiple transfusions in Sri Lanka *The Ceylon medical journal*, 46(3), 91

**Ferrari C., Valli A., Galati L., Penna A., Scaccaglia P., Giuberti T., Schianchi C., Missale G., Marin M.G., Fiaccadori F.** (1994//). T-cell response to structural and nonstructural hepatitis C virus antigens in persistent and self-limited hepatitis C virus infections *Hepatology*, 19(2), 286

**Ferrin G., Ranchal I., Llamaza C., Rodriguez-Peralvarez M.L., Romero-Ruiz A., Aguilar-Melero P., Lopez-Cillero P., Briceno J., Muntane J., Montero-Alvarez J.L., De la Mata M.** (2014//). Identification of candidate biomarkers for hepatocellular carcinoma in plasma of HCV-infected cirrhotic patients by 2-D DIGE *Liver international : official journal of the International Association for the Study of the Liver*, 34(3), 438

**Fong H.-F., Christian C.W.** (2012//). Evaluating

Sexually Transmitted Infections in Sexually Abused Children: New Techniques to Identify Old Infections *Clinical Pediatric Emergency Medicine*, 13(3), 202

**Forsgren M., Strannegard O.** (2007//). Clinical virology in Sweden *APMIS*, 115(5), 401

**Fouad S.A., Elsaaid N.H., Mohamed N.A., Abutaleb O.M.** (2014//). Diagnostic value of serum level of soluble tumor necrosis factor receptor IIalpha in Egyptian patients with chronic hepatitis C virus infection and hepatocellular carcinoma #journal#, 14(9), no pagination

**Fournillier A., Nakano I., Vitvitski L., Depla E., Vidalin O., Maertens G., Trepo C., Inchauspe G.** (1998//). Modulation of immune responses to hepatitis C virus envelope E2 protein following injection of plasmid DNA using single or combined delivery routes *Hepatology*, 28(1), 237

**Fox J.M., Newton R., Bedaj M., Keding A., Molyneux E., Carpenter L.M., Martin F., Mutalima N.** (2015//). Prevalence of hepatitis C virus in mothers and their children in Malawi *Tropical Medicine and International Health*, 20(5), 638

**Freeman A.J., Marinos G., French R.A., Lloyd A.R.** (2005//). Intrahepatic and peripheral blood virus-specific cytotoxic T lymphocyte activity is associated with a response to combination IFN-alpha and ribavirin treatment among patients with chronic hepatitis C virus infection *Journal of Viral Hepatitis*, 12(2), 125

**Frider B., Sookoian S., Castano G., Gonzalez J., Flichman D., Viudez P., Dawson G.J., Schlauder G.G., Mushahwar I.K.** (1998//). Detection of hepatitis G virus RNA in patients with acute non-A-E hepatitis *Journal of Viral Hepatitis*, 5(3), 161

**Fruttero E.R., Picciolo G., De Matteis J.A.** (2015//). Operative performances and efficiency for infectious disease testing of two immunochemistry analyzers - Abbott ARCHITECT i2000SR and DiaSorin Liaison XL *Clinical Chemistry and Laboratory Medicine*, 53(1), e19

**Fujimoto N., Kyo M., Ichikawa Y., Fukunishi T., Nagano S.** (1994//). The impact of hepatitis C virus infection on liver disease in renal transplant recipients *Transplant international : official journal of the European Society for Organ Transplantation*, 7 Suppl 1(#issue#), S346

**Fukuda S., Suzuki T., Nagayama R., Tsuda F., Kojima M., Okamoto H., Tanaka T., Miyakawa Y., Mayumi M.** (1994//). Hepatitis C virus RNA in blood units with antibodies detectable by a second-generation passive hemagglutination assay,

antibodies to synthetic core peptides or elevated transaminase levels *Transfusion Science*, 15(1), 83

**Ganczak M., Bohatyrewicz A., Korzen M., Karakiewicz B.** (2012//). The comparison of sharps injuries reported by doctors versus nurses from surgical wards in the context of the prevalence of HBV, HCV and HIV infections *Polski Przegląd Chirurgicalny/ Polish Journal of Surgery*, 84(4), 190

**Ganesh H.R., Krishna Prasad M.S., Vimal Kumar K., Veena Shetty A.** (2013//). Seroprevalence of leptospirosis among patients with acute febrile illness - A prospective study *Biomedicine (India)*, 33(3), 341

**Garbuglia A.R., Monachetti A., Galli C., Sabatini R., Ferreri M.L., Capobianchi M.R., Bagnarelli P.** (2014//). HCV core antigen and HCV-RNA in HIV/HCV co-infected patients with different HCV genotypes *BMC infectious diseases*, 14(#issue#), 222

**Gasiorowski J., Marchewka Z., Lapinski L., Szymanska B., Glowacka K., Knysz B., Dlugosz A., Wiela-Hojenska A.** (2013//). The investigation of specific biochemical markers in monitoring kidney function of drug addicts *Postępy Higieny i Medycyny Doswiadczalnej*, 67(#issue#), 1214

**Gatselis N.K., Georgiadou S.P., Tassopoulos N., Zachou K., Liaskos C., Hatzakis A., Dalekos G.N.** (2005//). Impact of parietal cell autoantibodies and non-organ-specific autoantibodies on the treatment outcome of patients with hepatitis C virus infection: A pilot study *World Journal of Gastroenterology*, 11(4), 482

**Ghorbani M., Nass T., Azizi A., Soare C., Aucoin S., Giulivi A., Anderson D.E., Diaz-Mitoma F.** (2005//). Comparison of antibody- and cell-mediated immune responses after intramuscular hepatitis C immunizations of BALB/c mice *Viral Immunology*, 18(4), 637

**Gish R.G., Qian K., Brooks L., Leung J., Xu Y., Pike I., Lau J.Y.N.** (1999//). Characterization of anti-hepatitis C virus-positive sera not genotyped by restriction fragment length polymorphism or serology *Journal of Gastroenterology and Hepatology (Australia)*, 14(4), 339

**Gish R.G., Warmerdam M.T., Zeldis J.B., Keeffe E.B., Nakazato P., Lim J., Cox K., Kuramoto I.K., Fry K.E., Yarbough P.O., Moeckli R., Yun-Cho K., Reyes G.R.** (1993//). Variation in antibody reactivity to the hepatitis C virus by comparative immunoscreening and enzyme immunoassay *Viral Immunology*, 6(1), 49

**Gobin E., Desruelle J.M., Vigier J.P.** (2001//).

Evaluation of evacuated blood collection tubes (BD Vacutainer™ SST™) analytical performances for the screening of anti-HIV, anti-HLV, anti-HCV, anti-HBc, anti-HBs, anti-CMV antibodies, and of HBS, P24 HIV antigens and for the assay of alanine aminotransferase *Transfusion Clinique et Biologique*, 8(1), 44

**Goergen B., Jakobs S., Symmons P., Hornes E., Meyer Zum Buschenfelde K.-H., Gerken G.** (1994//). Quantitation of HCV-replication using one-step competitive reverse transcription-polymerase chain reaction and a solid phase, colorimetric detection method *Journal of Hepatology*, 21(4), 678

**Goffin E., Pirson Y., Cornu C., Jadoul M., van Ypersele de Strihou C.** (1994//). Significance of NS3 and NS5 antigens in screening for HCV antibody *Lancet*, 343(8901), 854

**Gojak R., Ferhatovic M., Bajramovic N., Hadzic A., Gazibera B., Bankovic D.** (2012//). Importance of quick test for screening of former drug users *Medicinski arhiv*, 66(3 Suppl 1), 30

**Gomes Y.M., Pereira V.R., Nakazawa M., Rosa D.S., Barros M.D., Ferreira A.G., Silva E.D., Ogatta S.F., Krieger M.A., Goldenberg S.** (2001//). Serodiagnosis of chronic Chagas infection by using EIE-Recombinant-Chagas-Biomanguinhos kit *Memorias do Instituto Oswaldo Cruz*, 96(4), 497

**Gong J., Zhu C., Zhuang R., Song C., Li Q., Xu Z., Wei Y., Yang K., Yang A., Chen L., Jin B.** (2009//). Establishment of an enzyme-linked immunosorbent assay system for determining soluble CD96 and its application in the measurement of sCD96 in patients with viral hepatitis B and hepatic cirrhosis *Clinical and Experimental Immunology*, 155(2), 207

**Gorodin S., Unal S., Wang Y., Mikhaylov M.I., Bigbulatova L., Jehuda-Cohen T.** (2013//). New tools in HCV diagnosis, in light of the enhanced awareness and the new drugs for treatment: SMARTube and stimmunology *The Scientific World Journal*, 2013(#issue#), no pagination

**Goudeau A., Dubois F.** (2000//). Biological diagnosis and follow-up of hepatitis C virus infections *Revue du Praticien*, 50(10), 1071

**Greer S., Alexander G.J.M.** (1995//). Viral serology and detection *Bailliere's Clinical Gastroenterology*, 9(4), 689

**Gretch D.R.** (1997//). Use and interpretation of HCV diagnostic tests in the clinical setting *Clinics in liver disease*, 1(3), 543

**Griffiths S.J., Koegl M., Boutell C., Zenner H.L., Crump C.M., Pica F., Gonzalez O., Friedel C.C., Barry G., Martin K., Craigon M.H., Chen R., Kaza L.N., Fossum E., Fazakerley J.K., Efstathiou S., Volpi A., Zimmer R., Ghazal P., Haas J.** (2013//). A Systematic Analysis of Host Factors Reveals a Med23-Interferon-lambda Regulatory Axis against Herpes Simplex Virus Type 1 Replication *PLoS Pathogens*, 9(8), no pagination

**Gu W.-M., Yang Y., Wang Q.-Z., Pan B.-S., Guo W., Wu L., Hu W.-Z., Yang S., Song B.-B., Zhang C.-Y.** (2013//). Comparing the performance of traditional non-treponemal tests on syphilis and non-syphilis serum samples *International Journal of STD and AIDS*, 24(12), 919

**Guobuzaitė A., Chokshi S., Balciuniene L., Voinic A., Stikleryte A., Zagminas K., Ambrozaitis A., Naoumov N.** (2008//). Viral clearance or persistence after acute hepatitis C infection: interim results from a prospective study *Medicina (Kaunas, Lithuania)*, 44(7), 510

**Gupta P.K., Kumar H., Basannar D.R., Jaiprakash M.** (2006//). Transfusion transmitted infections in armed forces: Prevalence and trends *Medical Journal Armed Forces India*, 62(4), 348

**Gupta S.K.** (2003//). Status of immunodiagnosis and immunocontraceptive vaccines in India *Advances in biochemical engineering/biotechnology*, 85(#issue#), 181

**Gupte G.M., Arankalle V.A.** (2012//). Evaluation of the immunogenicity of liposome encapsulated HVR1 and NS3 regions of genotype 3 HCV, either singly or in combination *Virology Journal*, 9(#issue#), no pagination

**Guttikonda S., Wang W., Suresh M.** (2004//). Molecular zipper assays: a simple homosandwich with the sensitivity of PCR *Journal of pharmacy & pharmaceutical sciences : a publication of the Canadian Society for Pharmaceutical Sciences, Societe canadienne des sciences pharmaceutiques*, 7(4), 7

**G Caspari, W H Gerlich, J Beyer, H Schmitt** (1995//). Age, sex and transaminase dependency of specific and nonspecific results from enzyme immunoassays for antibodies to hepatitis C virus and follow-up of blood donors. *Infusionstherapie und Transfusionsmedizin*, 22(4), 208

**G Dalagiorgou, N Vassilaki, P Foka, A Boumlic, A Kakkanas, E Kochlios, S Khalili, E Aslanoglou, S Veletza, G Orfanoudakis, D Vassilopoulos, S J Hadziyannis, J Koskinas, P Mavromara** (2011//). High levels of HCV core+1 antibodies in HCV



patients with hepatocellular carcinoma. *The Journal of general virology*, 92(Pt 6), 1343

**G Gitnick** (1992//). Hepatitis C: what progress?. *Scandinavian journal of gastroenterology. Supplement*, 192(#issue#), 50

**G Grohmann, R I Glass, J Gold, M James, P Edwards, T Borg, S E Stine, C Goldsmith, S S Monroe** (1991//). Outbreak of human calicivirus gastroenteritis in a day-care center in Sydney, Australia. *Journal of clinical microbiology*, 29(3), 544

**G Harcourt, E Gomperts, S Donfield, P Klenerman** (2006//). Diminished frequency of hepatitis C virus specific interferon gamma secreting CD4+ T cells in human immunodeficiency virus/hepatitis C virus coinfecting patients. *Gut*, 55(10), 1484

**G Icardi, P Bonanni, A M Raffo, A Masini, L Orione, M De Martini, P Crovari** (1997//). Evaluation of performance of the RIBA processor system for automated analysis of the strip immunoblot assay for detection of antibodies to hepatitis C virus. *Journal of clinical microbiology*, 35(9), 2331

**G J Kotwal** (1993//). Routine laboratory diagnosis of hepatitis C virus infection. *Journal of hepatology*, 17 Suppl 3(#issue#), S83

**G J Kotwal, V K Rustgi, B M Baroudy** (1992//). Detection of hepatitis C virus-specific antigens in semen from non-A, non-B hepatitis patients. *Digestive diseases and sciences*, 37(5), 641

**G J van Doornum, A Lodder, M Buimer, E J van Ameijden, S Bruisten** (2001//). Evaluation of hepatitis C antibody testing in saliva specimens collected by two different systems in comparison with HCV antibody and HCV RNA in serum. *Journal of medical virology*, 64(1), 13

**G La Torre, E De Vito, E Langiano, P Petta, G Colarossi, L Cipriani, M Tucciarone, G Ricciardi** (2003//). Epidemiology of hepatitis C virus antibodies in blood donors from the province of Latina, Italy. *European journal of epidemiology*, 18(7), 691

**G Longombardo, C Ferri, S Marchi, F Costa, F Lombardini, L Vacri, S Bombardieri, P Migliorini** (1998//). Immune response to an epitope of the NS4 protein of hepatitis C virus in HCV-related disorders. *Clinical immunology and immunopathology*, 87(2), 124

**G Maio, P d'Argenio, T Stroffolini, A Bozza, L Sacco, M E Tosti, M Intorcchia, E Fossi, G d'Alessio,**

**L A Kondili, M Rapicetta, A Mele** (2000//). Hepatitis C virus infection and alanine transaminase levels in the general population: a survey in a southern Italian town. *Journal of hepatology*, 33(1), 116

**G Michel, A Ritter, G Gerken, K H Meyer zum Buschenfelde, R Decker, M P Manns** (1992//). Anti-GOR and hepatitis C virus in autoimmune liver diseases. *Lancet (London, England)*, 339(8788), 267

**G Missale, E Cariani, V Lamonaca, A Ravaggi, A Rossini, R Bertoni, M Houghton, Y Matsuura, T Miyamura, F Fiaccadori, C Ferrari** (1997//). Effects of interferon treatment on the antiviral T-cell response in hepatitis C virus genotype 1b- and genotype 2c-infected patients. *Hepatology (Baltimore, Md.)*, 26(3), 792

**G N Dalekos, K G Kistis, D S Boumba, P Voulgari, E K Zervou, A A Drosos, E V Tsianos** (2000//). Increased incidence of anti-cardiolipin antibodies in patients with hepatitis C is not associated with aetiopathogenetic link to anti-phospholipid syndrome. *European journal of gastroenterology & hepatology*, 12(1), 67

**G V Papatheodoridis, J K Delladetsima, A Katsoulidou, V Sypsa, M Albrecht, G Michel, A Hatzakis, N C Tassopoulos** (1997//). Significance of IgM anti-HCV core level in chronic hepatitis C. *Journal of hepatology*, 27(1), 36

**Gabriel Chamie, Maurizio Bonacini, David R Bangsberg, Jack T Stapleton, Christopher Hall, E Turner Overton, Rebecca Scherzer, Phyllis C Tien** (2007//). Factors associated with seronegative chronic hepatitis C virus infection in HIV infection. *Clinical infectious diseases : an official publication of the Infectious Diseases Society of America*, 44(4), 577

**Georg M Lauer, Kei Ouchi, Raymond T Chung, Tam N Nguyen, Cheryl L Day, Deborah R Purkis, Markus Reiser, Arthur Y Kim, Michaela Lucas, Paul Klenerman, Bruce D Walker** (2002//). Comprehensive analysis of CD8(+)-T-cell responses against hepatitis C virus reveals multiple unpredicted specificities. *Journal of virology*, 76(12), 6104

**Georgios N Dalekos, Eirini Makri, Stephanie Loges, Petra Obermayer-Straub, Kalliopi Zachou, Thomas Tsikrikas, Elenore Schmidt, Georgia Papadamou, Michael P Manns** (2002//). Increased incidence of anti-LKM autoantibodies in a consecutive cohort of hepatitis C patients from central Greece. *European journal of gastroenterology & hepatology*, 14(1), 35  
**Gert Hausdorf, Dirk Roggenbuck, Eugen Feist, Thomas Buttner, Peter R Jungblut, Karsten**

**Conrad, Christoph Berg, Reinhild Klein** (2009//). Autoantibodies to asialoglycoprotein receptor (ASGPR) measured by a novel ELISA-- revival of a disease-activity marker in autoimmune hepatitis. *Clinica chimica acta; international journal of clinical chemistry*, 408(1-2), 19

**Ghada F Helaly, Ebtisam F El Ghazzawi, Sherine M Shawky, Farag M Farag** (2015//). Occult hepatitis B virus infection among chronic hemodialysis patients in Alexandria, Egypt. *Journal of infection and public health*, 8(6), 562

**Ghada F Helaly, Nabila G Hussein, Wael Refai, Mervat Ibrahim** (2011//). Relation of serum insulin-like growth factor-1 (IGF-1) levels with hepatitis C virus infection and insulin resistance. *Translational research : the journal of laboratory and clinical medicine*, 158(3), 155

**Ghamdan Al-Tahish, Mohamed A El-Barrawy, Mona H Hashish, Zeinab Heddaya** (2013//). Effectiveness of three types of rapid tests for the detection of hepatitis C virus antibodies among blood donors in Alexandria, Egypt. *Journal of virological methods*, 189(2), 370

**Giambattista Ravera, Luigi Carlo Bottaro, Mauro Franceschini, Anna Morando, Monica De Polo, Mahmoud Zare, Carmen Giacobelli, Sabrina Zanardi** (2006//). Reliability and diagnostic use of a test for the search of the hepatitis C virus Ag (AgHCV). *Hepato-gastroenterology*, 53(71), 753

**Gilles Kaplanski, Thierry Maisonobe, Valerie Marin, Sandra Gres, Stephane Robitail, Catherine Farnarier, Jean-Robert Harle, Jean-Charles Piette, Patrice Cacoub** (2005//). Vascular cell adhesion molecule-1 (VCAM-1) plays a central role in the pathogenesis of severe forms of vasculitis due to hepatitis C-associated mixed cryoglobulinemia. *Journal of hepatology*, 42(3), 334

**Gillian C Harcourt, Sharyne Donfield, Edward Gomperts, Eric S Daar, Philip Jr Goulder, Rodney E Phillips, Paul Klenerman, Hemophilia Growth and Development Study (HGDS)** (2005//). Longitudinal analysis of CD8 T-cell responses to HIV and hepatitis C virus in a cohort of co-infected haemophiliacs. *AIDS (London, England)*, 19(11), 1135

**Giovanna A Moscato, Gianluigi Giannelli, Barbara Grandi, Daniela Pieri, Ombretta Marsi, Isabella Guarducci, Irene Batini, Emanuele Altomare, Salvatore Antonaci, Alfonso Capria, Giovanni Pellegrini, Rodolfo Sacco** (2011//). Quantitative determination of hepatitis C core antigen in therapy monitoring for chronic hepatitis C. *Intervirology*, 54(2), 61

**Gita Negi, Dushyant Singh Gaur** (2014//). Trends of transfusion transmissible diseases among blood donors at uttarakhand, India. *Indian journal of community medicine : official publication of Indian Association of Preventive & Social Medicine*, 39(3), 183

**Gregor Leckie, George Schneider, Klara Abravaya, Robert Hoenle, Julie Johanson, John Lampinen, Reuben Ofsaiof, Lisa Rundle, Shruti Shah, Andrea Frank, Dan Toolsie, Roy Vijesurier, Hong Wang, John Robinson** (2004//). Performance attributes of the LCx HCV RNA quantitative assay. *Journal of virological methods*, 115(2), 207

**Guilherme Albertoni, C P Arnoni, P R B Araujo, F O Carvalho, J A Barreto** (2010//). Signal to cut-off (S/CO) ratio and detection of HCV genotype 1 by real-time PCR one-step method: is there any direct relationship?. *The Brazilian journal of infectious diseases : an official publication of the Brazilian Society of Infectious Diseases*, 14(2), 147

**Guillaume Bach, Laure Perrin-Cocon, Estelle Gerossier, Aurelie Guironnet-Paquet, Vincent Lotteau, Genevieve Inchauspe, Anne Fournillier** (2010//). Single lysophosphatidylcholine components exhibit adjuvant activities in vitro and in vivo. *Clinical and vaccine immunology : CVI*, 17(3), 429

**Gustavo Ferrin, Manuel Rodriguez-Peralvarez, Patricia Aguilar-Melero, Isidora Ranchal, Camilo Llamaza, Clara I Linares, Sandra Gonzalez-Rubio, Jordi Muntane, Javier Briceno, Pedro Lopez-Cillero, Jose Luis Montero-Alvarez, Manuel de la Mata** (2015//). Plasma protein biomarkers of hepatocellular carcinoma in HCV-infected alcoholic patients with cirrhosis. *PLoS one*, 10(3), e0118527

**H Akkiz, S Colakoglu, F Koksall, H Korkut, A Hafta** (1996//). Hepatitis C virus genotypes in patients with hepatocellular carcinoma. *Journal of environmental pathology, toxicology and oncology : official organ of the International Society for Environmental Toxicology and Cancer*, 15(2-4), 85

**H Claeys, A Volckaerts, W Mertens, Z Liang, P Fiten, G Opdenakker** (1995//). Localization and reactivity of an immunodominant domain in the NS3 region of hepatitis C virus. *Journal of medical virology*, 45(3), 273

**H De Beenhouwer, H Verhaert, H Claeys, C Vermeylen** (1992//). Confirmation of hepatitis C virus positive blood donors by immunoblotting and polymerase chain reaction. *Vox sanguinis*, 63(3), 198

**H E Ownby, J J Korelitz, M P Busch, A E Williams, S H Kleinman, R O Gilcher, P Nourjah** (1997//). Loss of volunteer blood donors because of unconfirmed enzyme immunoassay screening results. *Retrovirus Epidemiology Donor Study. Transfusion*, 37(2), 199

**H H Feucht, B Zollner, M Schroter, S Polywka, P Buggisch, H Nolte, R Laufs** (1999//). High rate of chronicity in HCV infection determined by antibody confirmatory assay and PCR in 4110 patients during long-term follow-up. *Journal of clinical virology : the official publication of the Pan American Society for Clinical Virology*, 13(1-2), 43

**H H Feucht, B Zollner, R Laufs** (1995//). Comparison of conventional autoradiography with a new DNA enzyme immunoassay for the detection of hepatitis C virus-polymerase chain reaction amplification products. *Journal of virological methods*, 55(1), 105

**H H Hsu, M Donets, H B Greenberg, S M Feinstone** (1993//). Characterization of hepatitis C virus structural proteins with a recombinant baculovirus expression system. *Hepatology (Baltimore, Md.)*, 17(5), 763

**H H Hsu, T L Wright, D Luba, M Martin, S M Feinstone, G Garcia, H B Greenberg** (1991//). Failure to detect hepatitis C virus genome in human secretions with the polymerase chain reaction. *Hepatology (Baltimore, Md.)*, 14(5), 763

**H H Lin, H Y Hsu, M H Chang, K F Hong, Y C Young, T Y Lee, P J Chen, D S Chen** (1991//). Low prevalence of hepatitis C virus and infrequent perinatal or spouse infections in pregnant women in Taiwan. *Journal of medical virology*, 35(4), 237

**H I Atrah, M M Ahmed** (1996//). Hepatitis C virus seroconversion by a third generation ELISA screening test in blood donors. *Journal of clinical pathology*, 49(3), 254

**H Imai, Y Nakano, K Kiyosawa, E M Tan** (1993//). Increasing titers and changing specificities of antinuclear antibodies in patients with chronic liver disease who develop hepatocellular carcinoma. *Cancer*, 71(1), 26

**H J Alter, R Sanchez-Pescador, M S Urdea, J C Wilber, R J Lagier, A M Di Bisceglie, J W Shih, P D Neuwald** (1995//). Evaluation of branched DNA signal amplification for the detection of hepatitis C virus RNA. *Journal of viral hepatitis*, 2(3), 121

**H J Lin, T Tanwandee, F B Hollinger** (1997//). Improved methods for quantification of human immunodeficiency virus type 1 RNA and hepatitis C virus RNA in blood using spin column technology

and chemiluminescent assays of PCR products. *Journal of medical virology*, 51(1), 56

**H J Park, S M Byun, Y J Ha, J S Ahn, H M Moon** (1995//). Identification of immunodominant epitopes in the core and non-structural region of hepatitis C virus by enzyme immunoassay using synthetic peptides. *Journal of immunoassay*, 16(2), 167

**H Khorsi, T Salabi, S Castelain, O Jaillon, P Zawadzki, J P Capron, F Eb, C Wychowski, G Duverlie** (1998//). Amplification and detection of the terminal 3' non-coding region of hepatitis C virus isolates. *Research in virology*, 149(2), 115

**H L Tillmann, J Wiegand, I Glomb, A Jelineck, G Picchio, H Wedemeyer, M P Manns** (2005//). Diagnostic algorithm for chronic hepatitis C virus infection: role of the new HCV-core antigen assay. *Zeitschrift fur Gastroenterologie*, 43(1), 11

**H L Zaaijer, H T Cuypers, H W Reesink, P N Lelie** (1994//). Should the c100 antigen be removed from HCV antibody assays?. *Vox sanguinis*, 66(2), 150

**H L Zaaijer, H Vrieling, P J van Exel-Oehlers, H T Cuypers, P N Lelie** (1994//). Confirmation of hepatitis C infection: a comparison of five immunoblot assays. *Transfusion*, 34(7), 603

**H Lohr, C Nagel, H P Dienes, B Simpson, G Michel, B Goergen, K H Meyer zum Buschenfelde, G Gerken** (1994//). Significance of IgG and IgM HCV antibody secretion in vitro in patients with chronic hepatitis C: correlation with disease activity and response to interferon-alpha. *Hepatology (Baltimore, Md.)*, 20(6), 1383

**H M Cruz, V A Marques, C A Villela-Nogueira, K M R do O, L L Lewis-Ximenez, E Lampe, L M Villar** (2012//). An evaluation of different saliva collection methods for detection of antibodies against hepatitis C virus (anti-HCV). *Journal of oral pathology & medicine : official publication of the International Association of Oral Pathologists and the American Academy of Oral Pathology*, 41(10), 793

**H M Lee, J Naor, R Alhindi, T Chinfook, M Krajdén, T Mazzulli, D S Rootman** (2001//). Detection of hepatitis C virus in the corneas of seropositive donors. *Cornea*, 20(1), 37

**H Miyakawa, E Kikazawa, K Abe, K Kikuchi, H Fujikawa, M Matsushita, N Kawaguchi, T Morizane, K Ohya, M Kako** (1999//). Detection of anti-LKM-1(anti-CYP2D6) by an enzyme-linked immunosorbent assay in adult patients with chronic liver diseases. *Autoimmunity*, 30(2), 107

**H Ohnuma, T Tanaka, A Yoshikawa, H Murokawa, K Minegishi, R Yamanaka, H Y Lizuka, M Miyamoto, S Satoh, S Nakahira, T Tomono, T Murozuka, Y Takeda, Y Doi, H Mine, S Yokoyama, T Hirose, K Nishioka, Japanese Red Cross NAT Screening Research Group** (2001//).

The first large-scale nucleic acid amplification testing (NAT) of donated blood using multiplex reagent for simultaneous detection of HBV, HCV, and HIV-1 and significance of NAT for HBV. *Microbiology and immunology*, 45(9), 667

**H Okamoto, E Munekata, F Tsuda, K Takahashi, S Yotsumoto, T Tanaka, K Tachibana, Y Akahane, Y Sugai, Y Miyakawa** (1990//).

Enzyme-linked immunosorbent assay for antibodies against the capsid protein of hepatitis C virus with a synthetic oligopeptide. *The Japanese journal of experimental medicine*, 60(4), 223

**H P Kapprell, G Michel, H Hampl, F Bonino, J I Esteban** (1996//). Demonstration of specific detection of anti-HCV IgM core antibodies. *Journal of virological methods*, 59(1-2), 121

**H S Lee, C J Han, C Y Kim** (1993//). Predominant etiologic association of hepatitis C virus with hepatocellular carcinoma compared with hepatitis B virus in elderly patients in a hepatitis B-endemic area. *Cancer*, 72(9), 2564

**H Sakugawa, H Nakasone, T Nakayoshi, F Kinjo, A Saito, S Yakabi, H Zukeran, Y Miyagi, R Taira, K Koja** (1995//). High proportion of false positive reactions among donors with anti-HCV antibodies in a low prevalence area. *Journal of medical virology*, 46(4), 334

**H T Chung, J S Lee, A S Lok** (1993//). Prevention of posttransfusion hepatitis B and C by screening for antibody to hepatitis C virus and antibody to HBcAg. *Hepatology (Baltimore, Md.)*, 18(5), 1045

**H W Reesink, D Bresters, C L van der Poel, H T Cuypers, P N Lelie** (1992//). New developments in hepatitis C. *Scandinavian journal of gastroenterology. Supplement*, 194(#issue#), 82

**H Yatsushashi, O Inoue, M Koga, S Nagataki, K Mizuno, J Kolberg, E Beall, T A Cha, B Irvine, G Kuo** (1992//). Comparison of hepatitis C virus markers in patients with NANB hepatitis. *Journal of virological methods*, 37(1), 13

**Hadir Ahmed El-Mahallawy, Nahla Bahgat, Hanaa Mahmoud Alam El-Din, Samah A Farag, Akram Nouh, Inas El-Attar** (2004//). Hepatitis C virus and its genotypes and Helicobacter pylori in pediatric non-Hodgkin's lymphoma: could there be a possible etiologic role?. *Journal of the Egyptian*

**Haiying Liu, Gary L Norman, Zakera Shums, Howard J Worman, Edward L Krawitt, Nicola Bizzaro, Diego Vergani, Dimitrios P Bogdanos, George N Dalekos, Piotr Milkiewicz, Albert J Czaja, E Jenny Heathcote, Gideon M Hirschfield, Eng M Tan, Kiyomitsu Miyachi, Monica Bignotto, Pier Maria Battezzati, Ana Lleo, Patrick S Leung, Mauro Podda, M Eric Gershwin, Pietro Invernizzi** (2010//). PBC screen: an IgG/IgA dual isotype ELISA detecting multiple mitochondrial and nuclear autoantibodies specific for primary biliary cirrhosis. *Journal of autoimmunity*, 35(4), 436

**Hamish Mohammed, Jeffrey M Linnen, Jorge L Munoz-Jordan, Kay Tomashek, Gregory Foster, Amy S Broulik, Lyle Petersen, Susan L Stramer** (2008//). Dengue virus in blood donations, Puerto Rico, 2005. *Transfusion*, 48(7), 1348

**Hans Orlent, Isabelle Desombere, Bettina Hansen, Hans Van Vlierberghe, Bart Haagmans, Robert J De Knegt, Solko W Schalm, Geert Leroux-Roels, Harry L A Janssen, DITTO-HCV Study Group** (2010//). Baseline anti-NS4a antibodies in combination with on-treatment quantitative HCV-RNA reliably identifies nonresponders to pegylated interferon-ribavirin combination therapy after 4 weeks of treatment. *European journal of gastroenterology & hepatology*, 22(12), 1443

**Hatem A El-mezayen, Hossam Darwish** (2014//). Development of a novel score for early detection of hepatocellular carcinoma among high-risk hepatitis C virus patients. *Tumour biology: the journal of the International Society for Oncodevelopmental Biology and Medicine*, 35(7), 6501

**Hayley A Croom, Kim M Richards, Susan J Best, Barbara H Francis, Elizabeth I M Johnson, Elizabeth M Dax, Kim M Wilson** (2006//). Commercial enzyme immunoassay adapted for the detection of antibodies to hepatitis C virus in dried blood spots. *Journal of clinical virology: the official publication of the Pan American Society for Clinical Virology*, 36(1), 68

**Heike Bantel, Andreas Luger, Jan Heidemann, Xandra Volkmann, Christopher Poremba, Christian P Strassburg, Michael Peter Manns, Klaus Schulze-Osthoff** (2004//). Detection of apoptotic caspase activation in sera from patients with chronic HCV infection is associated with fibrotic liver injury. *Hepatology (Baltimore, Md.)*, 40(5), 1078

**Helena Medina Cruz, Leticia de Paula Scalioni, Vanessa Salette de Paula, Elisangela Ferreira da Silva, Kycia Maria Rodrigues do O, Flavio**

**Augusto Padua Milagres, Marcelo Santos Cruz, Francisco Inacio Bastos, Priscila Pollo-Flores, Erotildes Leal, Ana Rita Coimbra Motta-Castro, Jose Henrique Pilotto, Lia Laura Lewis-Ximenez, Elisabeth Lampe, Livia Melo Villar** (2015//). Evaluating HBsAg rapid test performance for different biological samples from low and high infection rate settings & populations. *BMC infectious diseases*, 15(#issue#), 548

**Hesam Ahmadi Nooredinvand, David W Connell, Mahmoud Asgheddi, Mohammed Abdullah, Marie O'Donoghue, Louise Campbell, Melissa I Wickremasinghe, Ajit Lalvani, Onn Min Kon, Shahid A Khan** (2015//). Viral hepatitis prevalence in patients with active and latent tuberculosis. *World journal of gastroenterology*, 21(29), 8920

**Hie-Won L Hann, Jungmin Lee, Anne Bussard, Catherine Liu, Yongri R Jin, Koel Guha, Marcia M Clayton, Kristin Ardlie, Michael J Pellini, Mark A Feitelson** (2004//). Preneoplastic markers of hepatitis B virus-associated hepatocellular carcinoma. *Cancer research*, 64(20), 7329

**Hiroshi Miyakawa, Yumi Kawashima, Eriko Kitazawa, Naomi Kawaguchi, Takashi Kato, Kentaro Kikuchi, Erika Imai, Hirotoshi Fujikawa, Etsuko Hashimoto, Wolfgang Schlumberger** (2003//). Low frequency of anti-SLA/LP autoantibody in Japanese adult patients with autoimmune liver diseases: analysis with recombinant antigen assay. *Journal of autoimmunity*, 21(1), 77

**Hitoshi Togashi, Chika Hashimoto, Junji Yokozawa, Akihiko Suzuki, Kazuhiko Sugahara, Takafumi Saito, Ichiro Yamaguchi, Hala Badawi, Norikazu Kainuma, Masaaki Aoyama, Hiroaki Ohya, Takao Akatsuka, Yasuhito Tanaka, Masashi Mizokami, Sumio Kawata** (2008//). What can be revealed by extending the sensitivity of HBsAg detection to below the present limit?. *Journal of hepatology*, 49(1), 17

**Hongbo Shi, Li Xie, Honglin Shi, Li Yan, Zhongping Duan** (2012//). Characterization and application of monoclonal antibody against hepatitis C virus nonstructural protein three. *Hybridoma* (2005), 31(1), 54

**Hubert Darius J Daniel, Priya Abraham, Sukanya Raghuraman, Perumal Vivekanandan, Thenmozhi Subramaniam, Gopalan Sridharan** (2005//). Evaluation of a rapid assay as an alternative to conventional enzyme immunoassays for detection of hepatitis C virus-specific antibodies. *Journal of clinical microbiology*, 43(4), 1977

**Hui-Chun Li, Shih-Yen Lo** (2015//). Hepatitis C virus: Virology, diagnosis and treatment. *World journal of hepatology*, 7(10), 1377

**Hadziyannis E., Minopetrou M., Georgiou A., Spanou F., Koskinas J.** (2013//). Is HCV core antigen a reliable marker of viral load? An evaluation of HCV core antigen automated immunoassay *Annals of Gastroenterology*, 26(2), 146

**Hafeez-ud-din, Siddiqui T.S., Lahrasab W., Sharif M.A.** (2012//). Prevalence of hepatitis B and C in healthy adult males of paramilitary personnel in Punjab *Journal of Ayub Medical College, Abbottabad : JAMC*, 24(3-4), 138

**Han X., Aho M., Vene S., Peltomaa M., Vaheri A., Vapalahti O.** (2001//). Evaluation of hepatitis C antibody testing in saliva specimens collected by two different systems in comparison with HCV antibody and HCV RNA in serum *Journal of Medical Virology*, 64(1), 13

**Hanafiah K.M., Garcia M., Anderson D.** (2013//). Point-of-care testing and the control of infectious diseases *Biomarkers in Medicine*, 7(3), 333

**Harbron S.** (1995//). Recombinant antigens in immunoassay *Expert Opinion on Investigational Drugs*, 4(3), 189

**He L., Zang A., Du M., Ma D., Yuan C., Zhou C., Mu J., Shi H., Li D., Huang X., Deng Q., Xiao J., Yan H., Hui L., Lan K., Xiong S., Li X., Huang Z., Xiao H.** (2015//). mTOR regulates TLR-induced c-fos and Th1 responses to HBV and HCV vaccines *Virologica Sinica*, 30(3), 174

**Health Quality Ontario** (2006//). Optimum methadone compliance testing: an evidence-based analysis. *Ontario health technology assessment series*, 6(21), 1

**Heck E., Brown A., Cavanagh H.D.** (2013//). Nucleic acid testing and tissue safety: An eye banks five-year review of hiv and hepatitis testing for donor corneas *Cornea*, 32(4), 503

**Heiat M., Ranjbar R., Alavian S.M.** (2014//). Classical and modern approaches used for viral hepatitis diagnosis *Hepatitis Monthly*, 14(4), no pagination

**Heintges T., Mohr L., Niederau C., Scheiffler F., Hensel F., Haussinger D.** (1998//). Quantitative hepatitis C RNA-polymerase chain reaction and detection with DNA-ELISA *Hepato-Gastroenterology*, 45(23), 1684

**Helaly G.F., Abou Shamaa L.A.** (2006//). Influence

of hepatitis C virus infection on circulating levels of sICAM-1 and VEGF in patients with hepatitis C and hepatocellular carcinoma (HCC) and their role in enhancing detection of HCC *The Egyptian journal of immunology / Egyptian Association of Immunologists*, 13(1), 27

**Henrard D.R.,Berthillon P.,Scheffel J.W.,Ladaique P.L.,Moore B.S.,Pailhous M.C.,Finetti P.H.,Trepo C.** (1998//). Lack of evidence of hepatitis C infection in 290 blood component recipients, demonstrated by several single-antigen research immunoassays *Transfusion*, 38(2), 194

**Herremans M.,Bakker J.,Duizer E.,Vennema H.,Koopmans M.P.G.** (2007//). Use of serological assays for diagnosis of hepatitis e virus genotype 1 and 3 infections in a setting of low endemicity *Clinical and Vaccine Immunology*, 14(5), 562

**Hodgetts A.,Levin M.,Kroll J.S.,Langford P.R.** (2007//). Biomarker discovery in infectious diseases using SELDI *Future Microbiology*, 2(1), 35

**Hofmann H.** (1996//). Comparison of four newly developed immunoblot assays with RIBA II for detection of HCV antibodies *Serodiagnosis and Immunotherapy in Infectious Disease*, 8(2), 79

**Hotta H.,Kemapunmanus M.,Apichartpiyakul C.,Soetjpto,Handajani R.,Barzaga N.G.** (1997//). Differential distribution of hepatitis C virus subtypes in Asia: comparative study among Thailand, Indonesia, the Philippines and Japan *The Southeast Asian journal of tropical medicine and public health*, 28 Suppl 3(#issue#), 23

**Huo T.I.,Wu J.C.,Yen F.S.,Sheen I.J.,Lee S.D.** (1996//). Polymerase chain reaction analysis for viral nucleic acids in acute sporadic hepatitis patients negative for serum hepatitis B surface antigen and antibodies to hepatitis C virus *Zhonghua yi xue za zhi = Chinese medical journal; Free China ed*, 58(6), 379

**Hyder O.,Ijaz M.,Arshad M.A.,Zahira T.** (2010//). Age-specific frequency of screen-detected hepatitis C virus seropositivity in men from the Punjab province of Pakistan *Journal of medical screening*, 17(4), 214

**Ichimura H.,Tamura I.,Yamada O.,Takezaki E.,Koda T.,Kurimura O.,Kurimura T.** (1992//). Hepatitis C virus RNA and hepatitis C virus antibody in the serum of patients with abnormal liver function *Journal of Infection*, 25(SUPPL. 1), 47

**Idrees M.** (2001//). Comparison of two typing systems for genotyping of hepatitis C virus isolates *Journal of the College of Physicians and Surgeons*

*Pakistan*, 11(11), 679

**Ilyas M.,Ahmad I.** (2014//). Chemiluminescent microparticle immunoassay based detection and prevalence of HCV infection in district Peshawar *Pakistan Virology journal*, 11(#issue#), 127

**Isahak I.,Baharin R.,Hakim A.S.,Abu Bakar M.,George E.** (1993//). Antibody to hepatitis C virus in thalassemia patients *The Malaysian journal of pathology*, 15(1), 85

**I G Bondarenko, P E Garrett, I N Savinova, Y A Sedunova** (1999//). Lack of correlation between sensitivity characteristics of the tests for hepatitis C virus antibodies estimated with serially diluted and natural low-reactive control specimens. *Scandinavian journal of clinical and laboratory investigation*, 59(2), 153

**I M Zitron, M Laurinaitis, L Qu, A L Silverman, S C Gordon** (2000//). Immunological responses in patients who have spontaneously eradicated hepatitis C virus infection. *Viral immunology*, 13(4), 521

**I Srugo, E Shinar, S Bar-Shany, L Amos** (1998//). Hepatitis B and C markers among alcoholics in Israel: high incidence of HCV infection. *European journal of epidemiology*, 14(4), 333

**I Stefanidis, E K Zervou, C Rizos, C Syrganis, E Patsidis, G Kyriakopoulos, L Sdrakas, N Tsiannas, E I Rigopoulou, V Liakopoulos, G N Dalekos** (2004//). Hepatitis E virus antibodies in hemodialysis patients: an epidemiological survey in central Greece. *The International journal of artificial organs*, 27(10), 842

**Idania Gonzalez-Perez, Yaime Josefina Gonzalez Gonzalez, Ariel Vina-Rodriguez, Anny Armas Cayarga, Rosa Lydia Solis** (2004//). The usefulness of Umelosa hepatitis C virus qualitative kit as supplemental test for confirmation of hepatitis C virus infection. *Revista da Sociedade Brasileira de Medicina Tropical*, 37(1), 25

**Iman Gouda, Ola Nada, Sameera Ezzat, Mai Eldaly, Christopher Loffredo, Clive Taylor, Mohamed Abdel-Hamid** (2010//). Immunohistochemical detection of hepatitis C virus (genotype 4) in B-cell NHL in an Egyptian population: correlation with serum HCV-RNA. *Applied immunohistochemistry & molecular morphology : AIMM / official publication of the Society for Applied Immunohistochemistry*, 18(1), 29

**Inmaculada Castillo, Javier Bartolome, Juan Antonio Quiroga, Guillermina Barril, Vicente Carreno** (2010//). Diagnosis of occult hepatitis C

without the need for a liver biopsy. *Journal of medical virology*, 82(9), 1554

**Isabel Zvibel, Phillipe Halfon, Sigal Fishman, Guillaume Penaranda, Moshe Leshno, Anat Bet Or, Zamir Halpern, Ran Oren** (2009//). Syndecan 1 (CD138) serum levels: a novel biomarker in predicting liver fibrosis stage in patients with hepatitis C. *Liver international : official journal of the International Association for the Study of the Liver*, 29(2), 208

**Izumi Okura, Norio Horiike, Kojiro Michitaka, Morikazu Onji** (2004//). Effect of mutation in the hepatitis C virus nonstructural 5B region on HCV replication. *Journal of gastroenterology*, 39(5), 449

**J A Neville, L E Prescott, V Bhattacharjee, N Adams, I Pike, B Rodgers, A El-Zayadi, S Hamid, G M Dusheiko, A A Saeed, G H Haydon, P Simmonds** (1997//). Antigenic variation of core, NS3, and NS5 proteins among genotypes of hepatitis C virus. *Journal of clinical microbiology*, 35(12), 3062

**J A Oliva, G Ercilla, J M Mallafre, M Bruguera, J Carrio, B J Pereira** (1995//). Markers of hepatitis C infection among hemodialysis patients with acute and chronic infection: implications for infection control strategies in hemodialysis units. *The International journal of artificial organs*, 18(2), 73

**J A Quiroga, J Martin, M Pernas, M Pardo, M Herrero, I Castillo, J Bartolome, V Carreno** (1994//). Evidence of subtype-specific antibodies to antigenic epitopes in the NS5 region of hepatitis C virus in the circulation of patients with chronic hepatitis C. *Clinical and diagnostic laboratory immunology*, 1(5), 545

**J A Quiroga, M L Campillo, I Catillo, J Bartolome, J C Porres, V Carreno** (1991//). IgM antibody to hepatitis C virus in acute and chronic hepatitis C. *Hepatology (Baltimore, Md.)*, 14(1), 38

**J Abb** (1991//). Prevalence of hepatitis C virus antibodies in hospital personnel. *Zentralblatt fur Bakteriologie : international journal of medical microbiology*, 274(4), 543

**J al-Wakeel, G H Malik, S al-Mohaya, A Mitwalli, F Baroudi, H el Gamal, M Kechrid** (1996//). Liver disease in dialysis patients with antibodies to hepatitis C virus. *Nephrology, dialysis, transplantation : official publication of the European Dialysis and Transplant Association - European Renal Association*, 11(11), 2265

**J Andreu, M A Abad, A Sanchez-Quijano, R Torronteras, F Luque, J Garcia de las Heras, B Soto, J A Pineda, M Leal, E Lissen** (1994//). High

rate of nonspecific anti-hepatitis C reactivity amongst homosexual men in comparison with that found in other sexually active groups and blood donors. *Viral Hepatitis and AIDS Study Group. Journal of internal medicine*, 236(1), 73

**J Benitez, D Palenzuela, J Rivero, J V Gavilondo** (1998//). A recombinant protein based immunoassay for the combined detection of antibodies to HIV-1, HIV-2 and HTLV-I. *Journal of virological methods*, 70(1), 85

**J Birguel, J G Ndong, S Akhavan, G Moreau, J J Sobnangou, C Aurenche, F Lunel, V Thibault, J M Huraux** (2011//). [Viral markers of hepatitis B, C and D and HB vaccination status of a health care team in a rural district of Cameroon]. *Medecine tropicale : revue du Corps de sante colonial*, 71(2), 201

**J Brown, S Dourakis, P Karayiannis, R Goldin, J Chiba, H Ohba, T Miyamura, H C Thomas** (1992//). Seroprevalence of hepatitis C virus nucleocapsid antibodies in patients with cryptogenic chronic liver disease. *Hepatology (Baltimore, Md.)*, 15(2), 175

**J Bukh, P Wantzin, K Krosggaard, F Knudsen, R H Purcell, R H Miller** (1993//). High prevalence of hepatitis C virus (HCV) RNA in dialysis patients: failure of commercially available antibody tests to identify a significant number of patients with HCV infection. *Copenhagen Dialysis HCV Study Group. The Journal of infectious diseases*, 168(6), 1343

**J Bukh, R H Miller, M C Kew, R H Purcell** (1993//). Hepatitis C virus RNA in southern African blacks with hepatocellular carcinoma. *Proceedings of the National Academy of Sciences of the United States of America*, 90(5), 1848

**J C Bode, D M Alscher, H Wisser, C Bode** (1995//). Detection of hepatitis C virus antibodies and hepatitis C virus RNA in patients with alcoholic liver disease. *Alcohol and alcoholism (Oxford, Oxfordshire)*, 30(1), 97

**J C Chang, C Seidel, B Ofenloch, D L Jue, H A Fields, Y E Khudyakov** (1999//). Antigenic heterogeneity of the hepatitis C virus NS4 protein as modeled with synthetic peptides. *Virology*, 257(1), 177

**J C Hierholzer, P E Halonen, P G Bingham, R A Coombs, Y O Stone** (1994//). Antigen detection in human respiratory Coronavirus infections by monoclonal time-resolved fluoroimmunoassay. *Clinical and diagnostic virology*, 2(3), 165

**J C Ryff** (1997//). Clinical investigation of the immunogenicity of interferon-alpha 2a. *Journal of interferon & cytokine research : the official journal of*

*the International Society for Interferon and Cytokine Research*, 17 Suppl 1(#issue#), S29

**J C Sheu, S H Lee, J T Wang, L N Shih, T H Wang, D S Chen** (1992//). Prevalence of anti-HCV and HCV viremia in hemodialysis patients in Taiwan. *Journal of medical virology*, 37(2), 108

**J Cosserat, P Cacoub, O Bletry** (1996//). Immunological disorders in C virus chronic hepatitis. *Nephrology, dialysis, transplantation : official publication of the European Dialysis and Transplant Association - European Renal Association*, 11 Suppl 4(#issue#), 31

**J E Gao, Q M Tao, J P Guo, H P Ji, Z W Lang, Y Ji, B F Feng** (1997//). Preparation and application of monoclonal antibodies against hepatitis C virus nonstructural proteins. *World journal of gastroenterology*, 3(2), 114

**J Encke, J Findekle, J Geib, E Pfaff, W Stremmel** (2005//). Prophylactic and therapeutic vaccination with dendritic cells against hepatitis C virus infection. *Clinical and experimental immunology*, 142(2), 362

**J F Jusot, C Colin** (2001//). Cost-effectiveness analysis of strategies for hepatitis C screening in French blood recipients. *European journal of public health*, 11(4), 373

**J F Quaranta, S R Delaney, S Alleman, J P Cassuto, P Dellamonica, J P Allain** (1994//). Prevalence of antibody to hepatitis C virus (HCV) in HIV-1-infected patients (nice SEROCO cohort). *Journal of medical virology*, 42(1), 29

**J F Zmuda, B Wagoneer, L Liotta, G Whiteley** (2001//). Recognition of multiple classes of hepatitis C antibodies increases detection sensitivity in oral fluid. *Clinical and diagnostic laboratory immunology*, 8(6), 1267

**J H Kao, H H Lin, P J Chen, M Y Lai, T H Wang, M Mizokami, D S Chen** (1996//). Serotyping of hepatitis C virus in chronic type C hepatitis in Taiwan: correlation with genotypes. *Journal of gastroenterology*, 31(2), 224

**J H Lee, W K Roth, S Zeuzem** (1997//). Evaluation and comparison of different hepatitis C virus genotyping and serotyping assays. *Journal of hepatology*, 26(5), 1001

**J Hayashi, K Nakashima, M Hirata, A Noguchi, K Akazawa, Y Maeda, S Kashiwagi** (1992//). Hepatitis C virus detection is facilitated by the combined use of c100 protein and GOR epitope. *Gastroenterologia Japonica*, 27(5), 632

**J Hayashi, K Nakashima, Y Kishihara, M Ohmiya, E Yoshimura, M Hirata, S Kashiwagi** (1993//). Improved detection of antibodies to hepatitis C virus by the second-generation assay in patients with chronic non-A, non-B liver disease. *The Journal of infection*, 26(3), 287

**J Hilfenhaus, U Krupka, T Nowak, L B Cummins, K Fuchs, M Roggendorf** (1992//). Follow-up of hepatitis C virus infection in chimpanzees: determination of viraemia and specific humoral immune response. *The Journal of general virology*, 73 ( Pt 4)(#issue#), 1015

**J I Esteban, A Gonzalez, J M Hernandez, L Viladomiu, C Sanchez, J C Lopez-Talavera, D Lucea, C Martin-Vega, X Vidal, R Esteban** (1990//). Evaluation of antibodies to hepatitis C virus in a study of transfusion-associated hepatitis. *The New England journal of medicine*, 323(16), 1107

**J I Riezu-Boj, D Parker, M P Civeira, D Phippard, T P Corbishley, J Camps, A Castilla, J Prieto** (1992//). Detection of hepatitis C virus antibodies with new recombinant antigens: assessment in chronic liver diseases. *Journal of hepatology*, 15(3), 309

**J J Poterucha, J Rakela, L Lumeng, C H Lee, H F Taswell, R H Wiesner** (1992//). Diagnosis of chronic hepatitis C after liver transplantation by the detection of viral sequences with polymerase chain reaction. *Hepatology (Baltimore, Md.)*, 15(1), 42

**J L Bosmans, E J Nouwen, G Behets, K Gorteman, S O Huraib, F A Shaheen, G Maertens, G A Verpooten, M M Elseviers, M E de Broe** (1997//). Prevalence and clinical expression of HCV-genotypes in haemodialysis-patients of two geographically remote countries: Belgium and Saudi-Arabia. *Clinical nephrology*, 47(4), 256

**J Larsen, K Skaug, A Maeland** (1992//). Second-generation anti-HCV tests predict infectivity. *Vox sanguinis*, 63(1), 39

**J Liu, L Zhu, X Zhang, M Lu, Y Kong, Y Wang, G Li** (2001//). Expression, purification, immunological characterization and application of Escherichia coli-derived hepatitis C virus E2 proteins. *Biotechnology and applied biochemistry*, 34(Pt 2), 109

**J M Barrera, B Francis, G Ercilla, M Nelles, D Achord, J Darner, S R Lee** (1995//). Improved detection of anti-HCV in post-transfusion hepatitis by a third-generation ELISA. *Vox sanguinis*, 68(1), 15



- J M Barrera, M Bruguera, M G Ercilla, J M Sanchez-Tapias, M P Gil, J Costa, A Gelabert, J Rodes, R Castillo** (1991//). Incidence of non-A, non-B hepatitis after screening blood donors for antibodies to hepatitis C virus and surrogate markers. *Annals of internal medicine*, 115(8), 596
- J M Pawlowsky** (1999//). Diagnostic tests for hepatitis C. *Journal of hepatology*, 31 Suppl 1(#issue#), 71
- J M Pawlowsky, J Remire, F Darthuy, L Intrator, L Udin, D Dhumeaux, J Duval** (1995//). Is the detection of anti-hepatitis C virus core IgM influenced by the presence of serum rheumatoid factor?. *Journal of medical virology*, 45(1), 68
- J M Pawlowsky, L Prescott, P Simmonds, C Pellet, P Laurent-Puig, C Labonne, F Darthuy, J Remire, J Duval, C Buffet, J P Etienne, D Dhumeaux, E Dussaix** (1997//). Serological determination of hepatitis C virus genotype: comparison with a standardized genotyping assay. *Journal of clinical microbiology*, 35(7), 1734
- J M Sanchez-Tapias, J M Barrera, J Costa, M G Ercilla, A Pares, L Comalrena, F Soley, J Bruix, X Calvet, M P Gil** (1990//). Hepatitis C virus infection in patients with nonalcoholic chronic liver disease. *Annals of internal medicine*, 112(12), 921
- J P Allain** (2000//). Genomic screening for blood-borne viruses in transfusion settings. *Clinical and laboratory haematology*, 22(1), 1
- J P Horcajada, M Garcia-Bengoechea, G Cilla, P Etxaniz, E Cuadrado, J I Arenas** (1999//). Mixed cryoglobulinaemia in patients with chronic hepatitis C infection: prevalence, significance and relationship with different viral genotypes. *Annals of medicine*, 31(5), 352
- J P Watson, A M Brind, C E Chapman, C L Bates, F K Gould, S J Johnson, A D Burt, J Ferguson, P Simmonds, M F Bassendine** (1996//). Hepatitis C virus: epidemiology and genotypes in the north east of England. *Gut*, 38(2), 269
- J Peterson, G Green, K Iida, B Caldwell, P Kerrison, S Bernich, K Aoyagi, S R Lee** (2000//). Detection of hepatitis C core antigen in the antibody negative 'window' phase of hepatitis C infection. *Vox sanguinis*, 78(2), 80
- J Pillot, M Rioche, Y Lazizi** (1994//). ELISA in serodiagnosis of HCV infection. *FEMS microbiology reviews*, 14(3), 221
- J Raedle, G Oremek, W K Roth, W F Caspary, S Zeuzem** (1997//). Anti-p53 autoantibodies in hepatitis C virus-infected patients. *Anticancer research*, 17(4B), 3079
- J Raedle, W K Roth, G Oremek, W F Caspary, S Zeuzem** (1995//). Alpha-fetoprotein and p53 autoantibodies in patients with chronic hepatitis C. *Digestive diseases and sciences*, 40(12), 2587
- J Shimazaki, K Tsubota, M Sawa, S Kinoshita, T Ohkura, M Honda** (1994//). Detection of human immunodeficiency virus, hepatitis B virus, and hepatitis C virus in donor eyes using polymerase chain reaction. *The British journal of ophthalmology*, 78(11), 859
- J Watanabe, C Matsumoto, K Fujimura, T Shimada, H Yoshizawa, H Okamoto, H Iizuka, T Tango, H Ikeda, N Endo** (1993//). Predictive value of screening tests for persistent hepatitis C virus infection evidenced by viraemia. Japanese experience. *Vox sanguinis*, 65(3), 199
- J Y Lai, J S Tam, L Y Lam, N W Leung** (1992//). Prevalence of antibody to hepatitis C virus in HBsAg-negative chronic liver disease in Hong Kong using different assays. *Journal of medical virology*, 37(2), 158
- Jacqueline K Flynn, Gregory J Dore, Gail Matthews, Margaret Hellard, Barbara Yeung, William D Rawlinson, Peter A White, John M Kaldor, Andrew R Lloyd, Rosemary A Ffrench,ATAHC Study Group** (2012//). Impaired hepatitis C virus (HCV)-specific interferon-gamma responses in individuals with HIV who acquire HCV infection: correlation with CD4(+) T-cell counts. *The Journal of infectious diseases*, 206(10), 1568
- James J Goedert, Manhattan Charurat, William A Blattner, Ronald C Hershov, Jane Pitt, Clemente Diaz, Lynne M Mofenson, Karen Green, Howard Minkoff, Mary E Paul, David L Thomas, Denise Whitby,Women and Infants Transmission Study** (2003//). Risk factors for Kaposi's sarcoma-associated herpesvirus infection among HIV-1-infected pregnant women in the USA. *AIDS (London, England)*, 17(3), 425
- Janak Kishore, Manisha Srivastava, Nabajyoti Choudhury** (2011//). Serological study on parvovirus B19 infection in multitransfused thalassemia major patients and its transmission through donor units. *Asian journal of transfusion science*, 5(2), 140
- Jean Summerton, Melissa Riedesel, Oliver Laeyendecker, Charlotte Gaydos, Nancy E Maldeis, Andrew Hardick, Rhoda Ashley Morrow, Thomas C Quinn** (2007//). Effect of sexually transmitted disease (STD) coinfections on performance of three commercially available immunosorbent assays used for detection of herpes simplex virus type 2-specific antibody in men

attending Baltimore, Maryland, STD clinics. *Clinical and vaccine immunology : CVI*, 14(12), 1545

**Jean-Michel Pawlotsky** (2003//). Use and interpretation of hepatitis C virus diagnostic assays. *Clinics in liver disease*, 7(1), 127

**Jean-Michel Pawlotsky** (2002//). Use and interpretation of virological tests for hepatitis C. *Hepatology (Baltimore, Md.)*, 36(5 Suppl 1), S65

**Jean-Pierre Allain, Helen Lee** (2005//). Rapid tests for detection of viral markers in blood transfusion. *Expert review of molecular diagnostics*, 5(1), 31

**Jeffrey J Post, Yong Pan, Anthony J Freeman, Charles E Harvey, Peter A White, Patricia Palladinetti, Paul S Haber, George Marinou, Michael H Levy, John M Kaldor, Kate A Dolan, Rosemary A French, Andrew R Lloyd, William D Rawlinson, Hepatitis C Incidence and Transmission in Prisons Study (HITS) Group** (2004//). Clearance of hepatitis C viremia associated with cellular immunity in the absence of seroconversion in the hepatitis C incidence and transmission in prisons study cohort. *The Journal of infectious diseases*, 189(10), 1846

**Jia-Yu Chen, Fan Li** (2006//). Development of hepatitis C virus vaccine using hepatitis B core antigen as immuno-carrier. *World journal of gastroenterology*, 12(48), 7774

**Jian-Wu Yu, Gui-Qiang Wang, Li-Jie Sun, Xiao-Guang Li, Shu-Chen Li** (2007//). Predictive value of rapid virological response and early virological response on sustained virological response in HCV patients treated with pegylated interferon alpha-2a and ribavirin. *Journal of gastroenterology and hepatology*, 22(6), 832

**Jie Cao, Qiuli Chen, Huaqun Zhang, Peipei Qi, Chao Liu, Xufang Yang, Niansong Wang, Baohua Qian, Jinhong Wang, Shaohua Jiang, Hua Yang, Shuhan Sun, Wei Pan** (2011//). Novel evolved immunoglobulin (Ig)-binding molecules enhance the detection of IgM against hepatitis C virus. *PLoS one*, 6(4), e18477

**Jie Liu, Wenhua Yu, Shuye Liu** (2013//). Positive ratio of specific antibodies to F protein in serum samples from chronic HCV-infected patients using an enzyme-linked immunosorbent assay: systematic review and meta-analysis. *European journal of gastroenterology & hepatology*, 25(10), 1152

**Jillian Kallman, Mary Margaret O'Neil, Brett Larive, Navdeep Boparai, Leonard Calabrese, Zobair M Younossi** (2007//). Fatigue and health-

related quality of life (HRQL) in chronic hepatitis C virus infection. *Digestive diseases and sciences*, 52(10), 2531

**Jing He, Bingshui Xiu, Guohua Wang, Kun Chen, Xiaoyan Feng, Xiaoguo Song, Cuixia Zhu, Shigan Ling, Heqiu Zhang** (2011//). Double-antigen sandwich ELISA for the detection of anti-hepatitis C virus antibodies. *Journal of virological methods*, 171(1), 163

**Jing Liu, Yi Huang, Jingxing Wang, Nan Guo, Julin Li, Xiangdong Dong, Hongli Ma, Meiheili Tiemuer, Mei Huang, David J Wright, Paul Ness, Hua Shan, International Component NHLBI Retrovirus Epidemiology Donor Study-II (REDS-II)** (2012//). The increasing prevalence of serologic markers for syphilis among Chinese blood donors in 2008 through 2010 during a syphilis epidemic. *Transfusion*, 52(8), 1741

**Jiro Ikoma, Masahiko Kaito, Tomoaki Ishihara, Naoki Nakagawa, Akira Kamei, Naoki Fujita, Motoh Iwasa, Shigenori Tamaki, Shozo Watanabe, Yukihiko Adachi** (2002//). Early diagnosis of hepatocellular carcinoma using a sensitive assay for serum des-gamma-carboxy prothrombin: a prospective study. *Hepato-gastroenterology*, 49(43), 235

**Jo-Il Kim, Adela Bordeanu, Jae-Chul Pyun** (2009//). Diamond-like carbon (DLC) microelectrode for electrochemical ELISA. *Biosensors & bioelectronics*, 24(5), 1394

**Johannes Wiegand, Markus Cornberg, Nuray Aslan, Verena Schlaphoff, Christoph Sarrazin, Anne Kubitschke, Peter Buggisch, Ayse Ciner, Elmar Jaeckel, Michael P Manns, Heiner Wedemeyer** (2007//). Fate and function of hepatitis-C-virus-specific T-cells during peginterferon-alpha2b therapy for acute hepatitis C. *Antiviral therapy*, 12(3), 303

**Joop E Arends, Mark A A Claassen, Charlotte H S B van den Berg, Nening M Nanlohy, Karel J van Erpecum, Bert C Baak, Andy I M Hoepelman, Andre Boonstra, Debbie van Baarle** (2010//). T-cell responses at baseline and during therapy with peginterferon-alpha and ribavirin are not associated with outcome in chronic hepatitis C infected patients. *Antiviral research*, 87(3), 353

**Judith C Brillman, Cameron S Crandall, Christopher S Florence, Joshua L Jacobs** (2002//). Prevalence and risk factors associated with hepatitis C in ED patients. *The American journal of emergency medicine*, 20(5), 476

**Juliane Kant, Bernd Moller, Renate Heyne, Adam Herber, Stephan Bohm, Melanie Maier,**

- Uwe G Liebert, Joachim Mossner, Thomas Berg, Johannes Wiegand** (2013//). Evaluation of a rapid on-site anti-HCV test as a screening tool for hepatitis C virus infection. *European journal of gastroenterology & hepatology*, 25(4), 416
- Jabbari A., Besharat S., Khodabakshi B.** (2008//). Hepatitis C in hemodialysis centers of golestan province, northeast of Iran (2005) *Hepatitis Monthly*, 8(1), 61
- Janot C., Botte C.** (1992//). Hepatitis C virus *Revue francaise de transfusion et d'hemobiologie : bulletin de la Societe nationale de transfusion sanguine*, 35(3), 155
- Jeong M.-S., Ahn D.-R.** (2015//). A microwell plate-based multiplex immunoassay for simultaneous quantitation of antibodies to infectious viruses *The Analyst*, 140(6), 1995
- Jourbert J.J., Dewar J.B., Weinberg J., De Beer M., Parker J.S., Steele A.D.** (2003//). A cost-effective particle agglutination assay to detect viral antibodies in dried blood spots--a simple solution to HIV and HCV screening *The Central African journal of medicine*, 49(11-12), 127
- Jullien A.M.** (1995//). Transfusion and hepatitis C *Pathologie-biologie*, 43(8), 725
- Jusot J.F., Aubert C., Leconte Des Floris M.F., Rotily M., Lancon F., Colin C., Jullien A.M., Fournel J.J., Laubriat L., Fabre G., Botte C., Montchamont P.** (2002//). Declared hepatitis C screening strategies in blood recipients in French hospitals *Transfusion Clinique et Biologique*, 9(2), 130
- Kabongo N., Baule C., Van Vuuren M.** (2003//). Molecular analysis of bovine viral diarrhoea virus isolates from South Africa *Onderstepoort Journal of Veterinary Research*, 70(4), 273
- Kalus U., Wilkemeyer I., Caspari G., Schroeter J., Pruss A.** (2011//). Validation of the serological testing for anti-HIV-1/2, anti-HCV, HBsAg, and anti-HBc from post-mortem blood on the Siemens-BEP-III automatic system *Transfusion Medicine and Hemotherapy*, 38(6), 365
- Kannangai R., Abraham A.M., Sankar S., Sridharan G.** (2010//). Nanotechnology tools for single-virus particle detection *Indian Journal of Medical Microbiology*, 28(2), 95
- Kasprowicz V.O., Halliday J.S., Mitchell J., Klenerman P.** (2012//). MIGRAs: Are they the new IGRAs? Development of monokine-amplified IFN-gamma release assays *Biomarkers in Medicine*, 6(2), 177
- Kaur H., Dhanao J., Oberoi A.** (2000//). Evaluation of rapid kits for detection of HIV, HBsAg and HCV infections *Indian journal of medical sciences*, 54(10), 432
- Kenfe F.R., Urbaczek A.C., Silva J.C., Neo T.A., da Silva F.H., da Costa P.I.** (2013//). Development of diagnostic methods and study of the immunoreactivity of a mixture of recombinant core and E2 proteins fused to GST with control serum positive for hepatitis C *Talanta*, 110(#issue#), 32
- Khedmat H., Alavian S.-M., Miri S.M., Amini M., Abolghasemi H., Hajibeigi B., Alaeddini F., Fallahian F.** (2009//). Trends in seroprevalence of hepatitis B, hepatitis C, HIV, and syphilis infections in Iranian blood donors from 2003 to 2005 *Hepatitis Monthly*, 9(1), 24
- Khudyakov Y.E., Khudyakova N.S., Fields H.A., Jue D., Starling C., Favorov M.O., Krawczynski K., Polish L., Mast E., Margolis H.** (1993//). Epitope mapping in proteins of hepatitis E virus *Virology*, 194(1), 89
- Kintzios S.E.** (2007//). Cell-based biosensors in clinical chemistry *Mini-Reviews in Medicinal Chemistry*, 7(10), 1019
- Kisiel E., Radkowski M., Pawelczyk A., Horban A., Stanczak J., Bukowska-Osko I., Caraballo Cortes K., Kazmierczak J., Popiel M., Laskus T.** (2014//). Seronegative hepatitis C virus infection in patients with lymphoproliferative disorders *Journal of Viral Hepatitis*, 21(6), 424
- Kobayashi K., Ueno Y., Suzuki H., Miura M., Nagatomi R., Ishii M., Toyota T.** (1994//). Anti-idiotypic antibody production in hepatitis B vaccine recipients *Journal of Gastroenterology*, 29(6), 740
- Kodama T., Ichiyama S., Sato K., Nada T., Nakashima N.** (1998//). Evaluation of a membrane filter assay system, ortho HCV Ab quik pack, for detection of anti-hepatitis C virus antibody *Journal of Clinical Microbiology*, 36(5), 1439
- Kolho E., Naukkarinen R., Krusius T.** (1992//). Transmission of HCV infection by RIBA indeterminate and positive blood units *Transfusion medicine (Oxford, England)*, 2(3), 243
- Kondo Y., Kimura O., Tanaka Y., Ninomiya M., Iwata T., Kogure T., Inoue J., Sugiyama M., Morosawa T., Fujisaka Y., Shimosegawa T.** (2015//). Differential Expression of CX3CL1 in Hepatitis B Virus-Replicating Hepatoma Cells Can Affect the Migration Activity of CX3CR1+ Immune Cells *Journal of virology*, 89(14), 7016

**Kossen K., Vaish N.K., Jadhav V.R., Pasko C., Wang H., Jenison R., McSwiggen J.A., Polisky B., Seiwert S.D.** (2004//). High-throughput ribozyme-based assays for detection of viral nucleic acids *Chemistry and Biology*, 11(6), 807

**Koutouzov S., Jeronimo A.L., Campos H., Amoura Z.** (2004//). Nucleosomes in the pathogenesis of systemic lupus erythematosus *Rheumatic Disease Clinics of North America*, 30(3), 529

**Kroes A.C.M., Quint W.G.V., Heijtkink R.A.** (1991//). Significance of isolated hepatitis C core antibodies detected by enzyme immunoassay in a high risk population *Journal of Medical Virology*, 35(2), 96

**Kroot J.J.C., Tjalsma H., Fleming R.E., Swinkels D.W.** (2011//). Hepcidin in human iron disorders: Diagnostic implications *Clinical Chemistry*, 57(12), 1650

**Kucirka L.M., Dagher N.N., Montgomery R.A., Segev D.L., Singer A.L.** (2010//). High infectious risk organ donors in kidney transplantation: Risks, benefits, and current practices *Dialysis and Transplantation*, 39(5), 186

**Kucukbayrak A., Cakmak S., Hakyemez I.N., Tas T., Akdeniz H.** (2013//). Determining immunoassay cutoff value using Western blot results to predict hepatitis C infection in blood donors with low-titer anti-HCV reactivity *Folia Microbiologica*, 58(4), 343

**Level 1, Form Title & abstract screen, Is it or does it include an original ...**

**K A Laycock, L R Essary, S Delaney, M C Kuhns, J S Pepose** (1997//). A critical evaluation of hepatitis C testing of cadaveric corneal donors. *Cornea*, 16(2), 146

**K Aoyagi, K Iida, C Ohue, Y Matsunaga, E Tanaka, K Kiyosawa, S Yagi** (2001//). Performance of a conventional enzyme immunoassay for hepatitis C virus core antigen in the early phases of hepatitis C infection. *Clinical laboratory*, 47(3-4), 119

**K E Sherman, R L Creager, J O'Brien, S Sargent, S Piacentini, T Thieme** (1994//). The use of oral fluid for hepatitis C antibody screening. *The American journal of gastroenterology*, 89(11), 2025

**K H Chau, G J Dawson, I K Mushahwar, R A Gutierrez, R G Johnson, R R Lesniewski, L Mattsson, O Weiland** (1991//). IgM-antibody response to hepatitis C virus antigens in acute and chronic post-transfusion non-A, non-B hepatitis. *Journal of virological methods*, 35(3), 343

**K K Watanabe, M P Busch, G B Schreiber, T F Zuck** (2000//). Evaluation of the safety of Rh immunoglobulin by monitoring viral markers among Rh-negative female blood donors. *Vox sanguinis*, 78(1), 1

**K M Walsh, A Fletcher, R N MacSween, A J Morris** (2000//). Basement membrane peptides as markers of liver disease in chronic hepatitis C. *Journal of hepatology*, 32(2), 325

**K Makris, V Kouvelis, I Drakopoulos, E Oikonomou, A Maniatis** (1995//). Frequency and characteristics of post-transfusion hepatitis in Greece with emphasis on hepatitis C: comparing second- and third-generation assays. *Transfusion medicine (Oxford, England)*, 5(3), 213

**K Malm, E Kragstjerg, S Andersson** (2015//). Performance of Liaison XL automated immunoassay platform for blood-borne infection screening on hepatitis B, hepatitis C, HIV 1/2, HTLV 1/2 and *Treponema pallidum* serological markers. *Transfusion medicine (Oxford, England)*, 25(2), 101

**K Minegishi, A Yoshikawa, S Kishimoto, H Yugi, N Yokoya, M Sakurada, H Kiyokawa, K Nishioka, Japanese Red Cross NAT Screening Research Group** (2003//). Superiority of minipool nucleic acid amplification technology for hepatitis B virus over chemiluminescence immunoassay for hepatitis B surface antigen screening. *Vox sanguinis*, 84(4), 287

**K Nishioka** (1996//). Hepatitis C virus screening and intravenous immunoglobulin safety in Japan. *Clinical therapeutics*, 18 Suppl B(#issue#), 83

**K Nishioka** (1994//). Epidemiological studies on hepatitis C virus infection: detection, prevalence, exposure and prevention. *Intervirology*, 37(2), 58

**K Siemoneit, M da Silva Cardoso, A Wolpl, S Epple, H Wintersinger, K Koerner, B Kubanek** (1994//). Isotype-specific immune response to a single hepatitis C virus core epitope defined by a human monoclonal antibody: diagnostic value and correlation to PCR. *Annals of hematology*, 69(3), 129

**K Sjoberg, S Lindgren, S Eriksson** (1997//). Frequent occurrence of non-specific gliadin antibodies in chronic liver disease. Endomysial but not gliadin antibodies predict coeliac disease in patients with chronic liver disease. *Scandinavian journal of gastroenterology*, 32(11), 1162

**K Skaug, H Li, T O Jonassen, J Larsen, K J Figenschau** (1993//). Hepatitis C virus (HCV) RNA among anti-HCV-positive blood donors and their recipients. *Vox sanguinis*, 64(4), 215

**K Takahashi, H Okamoto, S Kishimoto, E Munekata, K Tachibana, Y Akahane, H Yoshizawa, S Mishiro** (1992//). Demonstration of a hepatitis C virus-specific antigen predicted from the putative core gene in the circulation of infected hosts. *The Journal of general virology*, 73 ( Pt 3)(#issue#), 667

**K Vahdat, H Keyvani, S M Tabib, S Rostamabadi, S M Valizadeh, S Cheraghi, S Shamsian, K Zandi** (2010//). Molecular epidemiology of hepatitis C virus genotypes in Bushehr province, Iran. *European review for medical and pharmacological sciences*, 14(10), 861

**K Wang, Y Chen, S Liu, S Qiu, S Gao, X Huang, J Zhang, X Peng, W Qiani, J Y Zhang** (2009//). Immunogenicity of Ra1A and its tissue-specific expression in hepatocellular carcinoma. *International journal of immunopathology and pharmacology*, 22(3), 735

**K X Luo, Z S Liang, S C Yang, R Zhou, Q H Meng, Y W Zhu, H T He, S Jiang** (1993//). Etiological investigation of acute post-transfusion non-A, non-B hepatitis in China. *Journal of medical virology*, 39(3), 219

**K Y Hung, K C Lee, C J Yen, K D Wu, T J Tsai, W Y Chen** (1997//). Revised cutoff values of serum aminotransferase in detecting viral hepatitis among CAPD patients: experience from Taiwan, an endemic area for hepatitis B. *Nephrology, dialysis, transplantation : official publication of the European Dialysis and Transplant Association - European Renal Association*, 12(1), 180

**Kamyar Kalantar-Zadeh, Charles J McAllister, Loren G Miller** (2005//). Clinical characteristics and mortality in hepatitis C-positive haemodialysis patients: a population based study. *Nephrology, dialysis, transplantation : official publication of the European Dialysis and Transplant Association - European Renal Association*, 20(8), 1662

**Kamyar Kalantar-Zadeh, Loren G Miller, Eric S Daar** (2005//). Diagnostic discordance for hepatitis C virus infection in hemodialysis patients. *American journal of kidney diseases : the official journal of the National Kidney Foundation*, 46(2), 290

**Kathleen A Brady, Mark Weiner, Barbara J Turner** (2009//). Undiagnosed hepatitis C on the general medicine and trauma services of two urban hospitals. *The Journal of infection*, 59(1), 62

**Katja Pfafferott, Pooja Deshpande, Elizabeth McKinnon, Shahzma Merani, Andrew Lucas, David Heckerman, Simon Mallal, Mina John, Silvana Gaudieri, Michaela Lucas** (2015//). Anti-

hepatitis C virus T-cell immunity in the context of multiple exposures to the virus. *PLoS one*, 10(6), e0130420

**Kazuyuki Sogawa, Kenta Noda, Hiroshi Umemura, Masanori Seimiya, Takahisa Kuga, Takeshi Tomonaga, Motoi Nishimura, Fumihiko Kanai, Fumio Imazeki, Hirotaka Takizawa, Masato Yoneda, Atsushi Nakajima, Mikihiko Tsutsumi, Osamu Yokosuka, Fumio Nomura** (2013//). Serum fibrinogen alpha C-chain 5.9 kDa fragment as a biomarker for early detection of hepatic fibrosis related to hepatitis C virus. *Proteomics. Clinical applications*, 7(5-6), 424

**Keane K Y Lai, Ming Jin, Shan Yuan, Meaghan F Larson, Jason A Dornitz, Daniel D Bankson** (2011//). Improved reflexive testing algorithm for hepatitis C infection using signal-to-cutoff ratios of a hepatitis C virus antibody assay. *Clinical chemistry*, 57(7), 1050

**Ken Stein, Kim Dalziel, Andrew Walker, Becky Jenkins, Alison Round, Pam Royle** (2004//). Screening for Hepatitis C in injecting drug users: a cost utility analysis. *Journal of public health (Oxford, England)*, 26(1), 61

**Kenji Abe, Eriko Hayakawa, Andrei V Sminov, Anna L Rossina, Xin Ding, Tran T-T Huy, Tetsutaro Sata, Vasily F Uchaikin** (2004//). Molecular epidemiology of hepatitis B, C, D and E viruses among children in Moscow, Russia. *Journal of clinical virology : the official publication of the Pan American Society for Clinical Virology*, 30(1), 57

**Kerstin Uhde-Holzem, Verena Schlosser, Sergei Viazov, Rainer Fischer, Ulrich Commandeur** (2010//). Immunogenic properties of chimeric potato virus X particles displaying the hepatitis C virus hypervariable region I peptide R9. *Journal of virological methods*, 166(1-2), 12

**Klaus H W Boeker, Christian I Haberkorn, Dirk Michels, Peer Flemming, Michael P Manns, Ralf Lichtinghagen** (2002//). Diagnostic potential of circulating TIMP-1 and MMP-2 as markers of liver fibrosis in patients with chronic hepatitis C. *Clinica chimica acta; international journal of clinical chemistry*, 316(1-2), 71

**Kristen L Hess, Dennis G Fisher, Grace L Reynolds** (2014//). Sensitivity and specificity of point-of-care rapid combination syphilis-HIV-HCV tests. *PLoS one*, 9(11), e112190

**Kuo Zhang, Lunan Wang, Guigao Lin, Jinming Li** (2015//). Is Anti-Hepatitis C Virus Antibody Level an Appropriate Marker to Preclude the Need for Supplemental Testing. *Intervirology*, 58(5), 310

**Kyoumi Nakazato, Satoru Tomioka, Katsuyuki**

- Nakajima, Hidetoshi Saito, Mihoko Kato, Tsukasa Kodaira, Shin-ichi Yatsuzuka, Younosuke Shimomura, Tomoko Hiroki, Kahoko Motoyama, Hiroko Kodama, Takeaki Nagamine** (2014//). Determination of the serum metallothionein (MT)<sub>1/2</sub> concentration in patients with Wilson's disease and Menkes disease. *Journal of trace elements in medicine and biology : organ of the Society for Minerals and Trace Elements (GMS)*, 28(4), 441
- L Baccaglioni, K Thongprasom, M Carrozzo, M Bigby** (2013//). Urban legends series: lichen planus. *Oral diseases*, 19(2), 128
- L Bakkali, R Guillou, M Gonzague, C Cruciere** (1994//). A rapid and sensitive chemiluminescence dot-immunobinding assay for screening hybridoma supernatants. *Journal of immunological methods*, 170(2), 177
- L De Cock, V Hutse, E Verhaegen, S Quoilin, H Vandenberghe, R Vranckx** (2004//). Detection of HCV antibodies in oral fluid. *Journal of virological methods*, 122(2), 179
- L E Prescott, A Berger, J M Pawlotsky, P Conjeevaram, I Pike, P Simmonds** (1997//). Sequence analysis of hepatitis C virus variants producing discrepant results with two different genotyping assays. *Journal of medical virology*, 53(3), 237
- L H Tobler, G Tegtmeier, S L Stramer, S Quan, J Dockter, C Giachetti, M P Busch** (2000//). Lookback on donors who are repeatedly reactive on first-generation hepatitis C virus assays: justification and rational implementation. *Transfusion*, 40(1), 15
- L H Tobler, S L Stramer, D Y Chien, S Lin, P Arcangel, B H Phelps, S L Cooper, M P Busch** (2007//). Antibodies to a novel antigen in acute hepatitis C virus infections. *Vox sanguinis*, 92(1), 1
- L H Tobler, S L Stramer, S R Lee, D Baggett, D Wright, D Hirschhorn, I Walsh, M P Busch** (2005//). Performance of ORTHO HCV core antigen and trak-C assays for detection of viraemia in pre-seroconversion plasma and whole blood donors. *Vox sanguinis*, 89(4), 201
- L Imberti, A Sottini, A Bettinardi, C Mazza, A Albertini, D Primi** (1992//). Non-radioisotopic methods for DNA probes. *Annales de biologie clinique*, 50(3), 163
- L Imberti, E Cariani, A Bettinardi, A Zonaro, A Albertini, D Primi** (1991//). An immunoassay for specific amplified HCV sequences. *Journal of virological methods*, 34(3), 233
- L J van Doorn, B Kleter, I Pike, W Quint** (1996//). Analysis of hepatitis C virus isolates by serotyping and genotyping. *Journal of clinical microbiology*, 34(7), 1784
- L Jin, X Wei, J Gomez, M Datta, A Birkett, D L Peterson** (1995//). Use of alpha-N,N-bis[carboxymethyl]lysine-modified peroxidase in immunoassays. *Analytical biochemistry*, 229(1), 54
- L M Mison, I F Young, M O'Donoghue, N Cowley, N Thorlton, C A Hyland** (1997//). Prevalence of hepatitis C virus and genotype distribution in an Australian volunteer blood donor population. *Transfusion*, 37(1), 73
- L M Webber, S Els, M B Taylor, W O Grabow** (1996//). Assessment of commercial enzyme immunoassay for hepatitis C virus serotyping. *Journal of clinical pathology*, 49(12), 994
- L Montebugnoli, G Borea, R Miniero, G Sprovieri** (1999//). A rapid test for the visual detection of anti-hepatitis C virus antibodies in whole blood. *Clinica chimica acta; international journal of clinical chemistry*, 288(1-2), 91
- L Sheng, A Widyastuti, H Kosala, J Donck, Y Vanrenterghem, E Setijoso, A Soumillion, C Verslype, R Schelstraete, M P Emonds, G Hess, S H Yap** (1998//). High prevalence of hepatitis G virus infection compared with hepatitis C virus infection in patients undergoing chronic hemodialysis. *American journal of kidney diseases : the official journal of the National Kidney Foundation*, 31(2), 218
- L Urbanelli, P Fortugno, F Bartoli, M Nuzzo, A De Tomassi, F Felici, P Monaci** (2000//). "Affinity maturation" of ligands for HCV-specific serum antibodies. *Journal of immunological methods*, 236(1-2), 167
- Laila Ahmed, Hosny Salama, Rasha Ahmed, Sherif Hamdy, Wafaa Al-Akel, Sanaa Abdel Shafi, Abeer Mahgoub, Amal Hareedy, Wael Fathy** (2009//). Non-invasive fibrosis seromarkers as a predictor of liver fibrosis in chronic hepatitis C and/or non-alcoholic steatohepatitis. *Arab journal of gastroenterology : the official publication of the Pan-Arab Association of Gastroenterology*, 10(1), 14
- Laurence Cagnon, Pamela Wagaman, Ralf Bartenschlager, Thomas Pietschmann, Tiejun Gao, Norman M Kneteman, David L J Tyrrell, Chander Bahl, Patrick Niven, Stephen Lee, Kenneth A Simmen** (2004//). Application of the trak-C HCV core assay for monitoring antiviral activity in HCV replication systems. *Journal of virological methods*, 118(1), 23

**Laurent Belec, Jerome Legoff, Ali Si-Mohamed, Francis Bloch, Francois Xavier Mbopi Keou, Pierre Becquart, Mathieu Matta, Thierry Prazuck, Jean Pierre Petite, Laurent Gutmann, Christopher Payan** (2003//). Mucosal humoral immune response to hepatitis C virus E1/E2 surface glycoproteins and HCV shedding in saliva and cervicovaginal fluids from chronically HCV-infected patients. *Journal of hepatology*, 38(6), 833

**Le Viet, Nguyen Thi Ngoc Lan, Phung Xuan Ty, Bjorn Bjorkvoll, Hedda Hoel, Tore Gutteberg, Anne Husebekk, Stig Larsen, Eystein Skjerve, Hans Husum** (2012//). Prevalence of hepatitis B & hepatitis C virus infections in potential blood donors in rural Vietnam. *The Indian journal of medical research*, 136(1), 74

**Lena Novack, Eilat Shinar, Jamal Safi, Hassan Soliman, Arieh Yaari, Noya Galai, Joseph S Pliskin, Batia Sarov** (2007//). Evaluation of pooled screening for anti-HCV in two blood services set-ups. *Tropical medicine & international health : TM & IH*, 12(3), 415

**Leonard B Seeff, Jay H Hoofnagle** (2003//). Appendix: The National Institutes of Health Consensus Development Conference Management of Hepatitis C 2002. *Clinics in liver disease*, 7(1), 261

**Leticia de Paula Scalioni, Helena Medina Cruz, Vanessa Salette de Paula, Juliana Custodio Miguel, Vanessa Alves Marques, Cristiane Alves Villela-Nogueira, Flavio Augusto Padua Milagres, Marcelo Santos Cruz, Francisco Inacio Bastos, Tarcisio Matos Andrade, Ana Rita Coimbra Motta-Castro, Lia Laura Lewis-Ximenez, Elisabeth Lampe, Livia Melo Villar** (2014//). Performance of rapid hepatitis C virus antibody assays among high- and low-risk populations. *Journal of clinical virology : the official publication of the Pan American Society for Clinical Virology*, 60(3), 200

**Li Xie, Xiao-dong Wu, De-zhuang Huang, Hai-lun Chen, Li-xiang He, Jian Wang, Da-kang Han** (2007//). Clinical application and analysis of hepatitis C virus NS3 antigen detection by ELISA in human serum. *Chinese medical journal*, 120(4), 294

**Li Zhou, Rui Gong, Xuan Lu, Yi Zhang, Jingfeng Tang** (2015//). Development of a Multiplex Real-Time PCR Assay for the Detection of *Treponema pallidum*, HCV, HIV-1, and HBV. *Japanese journal of infectious diseases*, 68(6), 481

**Li-Hua Hou, Gui-Xin Du, Rong-Bin Guan, Yi-Gang Tong, Hai-Tao Wang** (2003//). In vitro assay for HCV serine proteinase expressed in insect cells. *World journal of gastroenterology*, 9(7), 1629

**Li-Xin Zhu, Jing Liu, Ye Ye, You-Hua Xie, Yu-Ying Kong, Guang-Di Li, Yuan Wang** (2004//). A candidate DNA vaccine elicits HCV specific humoral and cellular immune responses. *World journal of gastroenterology*, 10(17), 2488

**Lihua Hou, Guixin Du, Yigang Tong, Haitao Wang** (2002//). Identification of B cell epitopes of hepatitis C virus RNA dependent RNA polymerase. *Journal of virological methods*, 104(1), 1

**Lin Shi, Shan Liu, Gui-Xiang Fan, Li Sheng, Hui-Xun Ren, Yu-Kang Yuan** (2006//). Effective induction of type 1 cytotoxic T cell responses in mice with DNA vaccine encoding two hepatitis C virus cytotoxic T lymphocyte epitopes. *Viral immunology*, 19(4), 702

**Lina Andrea Gomez, Oscar Penuela, Fernando Higuera** (2014//). Prevalence of antibodies against transfusion-transmissible infections (TTI) in blood donors from the Colombian eastern region. *Clinical laboratory*, 60(5), 869

**Lina Souan, Faten Tout, Mahmoud Siag, Maher A Sughayer** (2016//). Seroprevalence rates of transfusion-transmitted infections among blood donors in Jordan. *Journal of infection in developing countries*, 10(4), 377

**Linda Petrone, Teresa Chiacchio, Valentina Vanini, Elisa Petruccioli, Gilda Cuzzi, Cristina Di Giacomo, Luigia Pucci, Marzia Montalbano, Raffaella Lionetti, Angela Testa, Daniele Lapa, Assunta Navarra, Ubaldo Visco-Comandini, Delia Goletti** (2014//). High urine IP-10 levels associate with chronic HCV infection. *The Journal of infection*, 68(6), 591

**Luan Felipe Botelho-Souza, Alcione de Oliveira dos Santos, Lourdes Maria Borzacov, Eduardo Resende Honda, Juan Miguel Villalobos-Salcedo, Deusilene Souza Vieira** (2014//). Development of a reverse transcription quantitative real-time PCR-based system for rapid detection and quantitation of hepatitis delta virus in the western Amazon region of Brazil. *Journal of virological methods*, 197(#issue#), 19

**Labeledzka H., Simon K., Gladysz A.** (2002//). Clinical and epidemiological assessment of hepatitis C virus infection among voluntary blood donors *Medical Science Monitor*, 8(8), CR591

**Lagerkvist A.C., Foldes-Papp Z., Persson M.A.A., Rigler R.** (2001//). Fluorescence correlation spectroscopy as a method for assessment of interactions between phage displaying antibodies and soluble antigen *Protein Science*, 10(8), 1522

**Laperche S.,Elghouzzi M.H.,Morel P.,Asso-Bonnet M.,Le Marrec N.,Girault A.,Servant-Delmas A.,Bouchardeau F.,Deschaseaux M.,Piquet Y.** (2005//). Is an assay for simultaneous detection of hepatitis C virus core antigen and antibody a valuable alternative to nucleic acid testing? *Transfusion*, 45(12), 1965

**Latt N.L.,Araz F.,Alachkar N.,Durand C.M.,Gurakar A.** (2015//). Management of hepatitis C infection among patients with renal failure *Minerva gastroenterologica e dietologica*, 61(1), 39

**Laurent F.,Li J.S.,Vitvitski L.,Berby F.,Lamelin J.P.,Alonso C.,Trepo C.** (1992//). Importance of PCR in the diagnosis of hepatitis C *Revue française de transfusion et d'hémiobiologie : bulletin de la Société nationale de transfusion sanguine*, 35(3), 211

**Leforban Y.,Edwards S.,Ibata G.,Vannier P.** (1990//). A blocking ELISA to differentiate hog cholera virus antibodies in pig sera from those due to other pestiviruses *Annales de recherches vétérinaires. Annals of veterinary research*, 21(2), 119

**Levast M.,Larrat S.,Thelu M.-A.,Nicod S.,Plages A.,Cheveau A.,Zarski J.-P.,Seigneurin J.-M.,Morand P.,Leroy V.** (2010//). Prevalence and impact of occult hepatitis B infection in chronic hepatitis C patients treated with pegylated interferon and ribavirin *Journal of Medical Virology*, 82(5), 747

**Li F.H.,Guo L.S.,Yu Z.Q.,Wang Y.K.,Qi J.Y.,Yuan X.W.,Hao L.J.** (1993//). Establishment and application of SPA-co-operated ELISA for detection of anti-HCV-IgM *Journal of Tongji Medical University = Tong ji yi ke da xue xue bao*, 13(4), 209

**Li L.,Wang W.,Yu X.** (2000//). Detection of hepatitis C virus RNA in the tissue of hepatocellular carcinoma by multiple detection system *Zhonghua shi yan he lin chuang bing du xue za zhi = Zhonghua shi yan he lin chuang bingduxue zazhi = Chinese journal of experimental and clinical virology*, 14(1), 47

**Liebermann H.E.H.,Sietmann R.,Bange R.,Wazel W.,Riebe R.** (2005//). RiV particles are heat stable *Engineering in Life Sciences*, 5(3), 240

**Lin H.H.,Kao J.H.,Mizokami M.,Huang S.C.,Chen P.J.,Chen D.S.** (1996//). Serotypes, genotypes and levels of hepatitis C viremia in pregnant women in Taiwan *Journal of the Formosan Medical Association = Taiwan yi zhi*, 95(6), 429

**Lindley E.,Elseviers M.,Moll R.,Jadoul M.,Jayesekera H.,Zampieron A.,Harrington M.,De Vos J.-Y.** (2001//). Epidemiology and management of hepatitis C in haemodialysis patients: An informal multidisciplinary review *EDTNA-ERCA Journal*, 27(3), 156

**Liu H.,Zhang J.,Wang S.,Pang Z.,Wang Z.,Zhou W.,Wu M.** (2012//). Screening of autoantibodies as potential biomarkers for hepatocellular carcinoma by using T7 phase display system *Cancer Epidemiology*, 36(1), 82

**Liu P.,Shi Z.X.,Zhang Y.C.,Zhang X.Y.** (1998//). Comparative study on 4 EIA kits for screening antibody to hepatitis C virus in pooled sera *Biomedical and environmental sciences : BES*, 11(1), 75

**Long G.S.,Bacon B.R.,Bisceglie A.M.** (1996//). Interpreting serologic tests for hepatitis C virus infection: balancing cost and clarity *Cleveland Clinic journal of medicine*, 63(5), 264

**Lopes E.P.,Granato C.H.,Lanzoni V.,Granero L.,Paranhos-Baccala G.,Tomiyama H.,Silva A.E.,Ferraz M.L.** (2000//). Evaluation of an enzyme immunoassay for hepatitis C virus antibody detection using a recombinant protein derived from the core region of hepatitis C virus genome *Memorias do Instituto Oswaldo Cruz*, 95(5), 717

**Loubiere S.,Rotily M.,Durand-Zaleski I.,Costagliola D.,Moatti J.-P.** (2001//). Adjunction of polymerase chain reaction in screening for hepatitis C virus RNA in blood donations: Misuse of the principle of caution *Medecine/Sciences*, 17(3), 344

**Lu S.C.,Chin L.T.,Wu F.M.,Hsieh G.J.,Haung S.P.,Chen J.C.,Chang A.C.,Hsieh W.K.,Chen B.H.** (1999//). Seroprevalence of CMV antibodies in a blood donor population and premature neonates in the south-central Taiwan *The Kaohsiung journal of medical sciences*, 15(10), 603

**Lucas R.E.,Faoagali J.L.** (1999//). The serological status of Solomon Island blood donors *The Southeast Asian journal of tropical medicine and public health*, 30(3), 542

**Luksamijarulkul P.,Thammata N.,Sujirarat D.,Tiloklurs M.** (2004//). Hepatitis C virus infection among Thai blood donors: Antibody prevalence, risk factors and development of risk screening form *Southeast Asian Journal of Tropical Medicine and Public Health*, 35(1), 147

**Lumbreras C.,Delgado R.,Fuertes A.,Loinaz C.,Iglesias J.,Colina F.,Aguado J.M.,Gimeno**



- C., Garcia I., Lizasoain M., Moreno E., Noriega A.R.** (1994//). Clinical significance of hepatitis C virus (HCV) infection in liver transplant recipients: Role of serology and HCV RNA detection *Digestive Diseases and Sciences*, 39(5), 965
- Machado P.R.L., Machado L.M., Shibuya M., Rego J., Johnson W.D., Glesby M.J.** (2015//). Viral co-infection and leprosy outcomes: A cohort study *PLoS Neglected Tropical Diseases*, 9(8), no pagination
- Madalinski K., Godzik P.** (2009//). European demands for the formation of a hepatological laboratory network *Experimental and Clinical Hepatology*, 5(2), 39
- Maddrey W.C., Greenberger N.J.** (1997//). Containing hepatitis C *Hospital Practice*, 32(3), 107
- Madhusudhan K.** (2014//). Sero-prevalence of hepatitis B and C co-infection in multi-transfused children in South India *Research Journal of Pharmaceutical, Biological and Chemical Sciences*, 5(5), 1192
- Magrin S., Craxi A., Fabiano C., Simonetti R.G., Fiorentino G., Marino L., Di Quattro O., Di Marco V., Loiacono O., Volpes R., Almasio P., Urdea M.S., Neuwald P., Sanchez-Pescador R., Detmer J., Wilber J.C., Pagliaro L.** (1994//). Hepatitis C viremia in chronic liver disease: Relationship to interferon- alpha or corticosteroid treatment *Hepatology*, 19(2), 273
- Mahler M., Kessenbrock K., Szymrka M., Takasaki Y., Garcia-De La Torre I., Shoenfeld Y., Hiepe F., Shun-Le C., Von Muhlen C.A., Loch H., Hopfl P., Wiik A., Reeves W., Fritzler M.J.** (2006//). International multicenter evaluation of autoantibodies to ribosomal P proteins *Clinical and Vaccine Immunology*, 13(1), 77
- Maisonneuve P., Noel L.** (1994//). Demonstrating antibodies against hepatitis C virus in transfusion practice. Viral Hepatitis Working Group of the Societe Francaise de la Transfusion Sanguine *Transfusion clinique et biologique : journal de la Societe francaise de transfusion sanguine*, 1(5), 397
- Makimura M., Miyake S., Akino N., Takamori K., Matsuura Y., Miyamura T., Saito I.** (1996//). Induction of antibodies against structural proteins of hepatitis C virus in mice using recombinant adenovirus *Vaccine*, 14(1), 28
- Makris G.C., Makris M.C., Wilmot V.V., Geroulakos G., Falagas M.E.** (2010//). The role of infection in carotid plaque pathogenesis and stability: The clinical evidence *Current Vascular Pharmacology*, 8(6), 861
- Makroo R.N., Hegde V., Chowdhry M., Bhatia A., Rosamma N.L.** (2015//). Seroprevalence of infectious markers & their trends in blood donors in a hospital based blood bank in north India *Indian Journal of Medical Research*, 142(September), 317
- Manamperi A., Nugawela P., Gunawardene N.S., Abeyewickreme W., De Silva J.** (2010//). RNA positivity rates among anti-HCV reactive blood donors in Sri Lanka: A preliminary study *Indian Journal of Medical Microbiology*, 28(3), 264
- Mangia A., Antonucci F., Brunetto M., Capobianchi M., Faggioli S., Guido M., Farci P., Lampertico P., Marzano A., Niro G., Pisani G., Prati D., Puoti M., Raimondo G., Santantonio T., Smedile A., Lauria F.** (2008//). The use of molecular assays in the management of viral hepatitis *Digestive and Liver Disease*, 40(6), 395
- Maniez-Montreuil M., Dubois F.** (2000//). Interpretation of hepatitis C virus serology: Immunoblot assay and genomic amplification *Transfusion Clinique et Biologique*, 7(SUPPL. 1), 25
- Mansour-Ghaneel F., Sadeghi A., Mashhour M.Y., Joukar F., Besharati S., Roshan Z.A., Khosh-Sorur M.** (2009//). Prevalence of hepatitis B and C infection in hemodialysis patients of Rasht (Center of Guilan Province, Northern part of Iran) *Hepatitis Monthly*, 9(1), 45
- Marino Z., Carrion J.A., Bedini J.L., Crespo G., Martinez S.M., Sanchez-Tapias J.M., Fornas X., Navasa M.A.** (2011//). Evaluation of a portable hemoglobinometer (HemoCue) to control anemia in hepatitis C liver transplant recipients undergoing antiviral therapy *European Journal of Gastroenterology and Hepatology*, 23(10), 942
- Markowicz M., Grilnberger E., Huber F., Leibl G., Abrahamian H., Gartner M., Huber M., Chott A., Reiter M., Stanek G.** (2013//). Case report: Lymphogranuloma venereum proctitis-from rapid screening to molecular confirmation of a masked sexually transmitted disease *Diagnostic Microbiology and Infectious Disease*, 76(4), 516
- Marson P., Donadel C., Lazzaro A.R., Nardo G., Tenan S., Favero R., Andrian C., De Silvestro G.** (1997//). False positive anti-hepatitis C virus IgM core results in IgM monoclonal gammopathy *European Journal of Laboratory Medicine*, 5(1), 11
- Maudar K.K., Gandhi P., Mishra P.K., Varshney S., Punde R., Bhargava A.** (2012//). Novel Approach for Quantification of Hepatitis C Virus in Liver Cirrhosis Using Real-Time Reverse Transcriptase PCR *Journal of Gastrointestinal Surgery*, 16(1), 142
- Maylin S., Fouere S., Simon F., Delaugerre C.**

(2014//). Failure of fourth-generation enzyme immunoassay in HIV screening and plasma HIV-1 RNA detection in recent high-risk behavior *Intervirology*, 57(1), 49

**McArthur J.C.** (2012//). Painful small fiber neuropathies *CONTINUUM Lifelong Learning in Neurology*, 18(1), 106

**Mecchia M.,Casato M.,Tafi R.,Filocamo G.,Bonomo L.,Fiorilli M.,Cortese R.,Migliaccio G.,Nicosia A.** (1996//). Nonrheumatoid IgM in human hepatitis C virus-associated type II cryoglobulinemia recognize mimotopes of the CD4-like LAG-3 protein *Journal of immunology (Baltimore, Md. : 1950)*, 157(8), 3727

**Meena M.,Jindal T.,Hazarika A.** (2011//). Prevalence of hepatitis B virus and hepatitis C virus among blood donors at a tertiary care hospital in India: A five-year study *Transfusion*, 51(1), 198

**Melnyk O.,Duburcq X.,Olivier C.,Urbes F.,Auriault C.,Gras-Masse H.** (2002//). Peptide arrays for highly sensitive and specific antibody-binding fluorescence assays *Bioconjugate chemistry*, 13(4), 713

**Melve G.K.,Myrmel H.,Eide G.E.,Hervig T.** (2009//). Evaluation of the persistence and characteristics of indeterminate reactivity against hepatitis C virus in blood donors *Transfusion*, 49(11), 2359

**Mingorance L.,Friesland M.,Coto-Llerena M.,Perez-del-Pulgar S.,Boix L.,Lopez-Oliva J.M.,Bruix J.,Forns X.,Gastaminza P.** (2014//). Selective inhibition of hepatitis c virus infection by hydroxyzine and benzotropine *Antimicrobial Agents and Chemotherapy*, 58(6), 3451

**Miri-Dashe T.,Osawe S.,Daniel M.T.N.,Choji R.P.,Mamman I.,Deme K.,Damulak D.,Abimiku A.** (2014//). Comprehensive reference ranges for hematology and clinical chemistry laboratory parameters derived from normal Nigerian adults *PLoS ONE*, 9(5), no pagination

**Mishra D.,Pensi T.** (2004//). Transfusion Associated Hepatitis C in Multi-Transfused Thalassaemic Children [1] *Indian Pediatrics*, 41(3), 287

**Mittal M.,Zaman S.,Bhatnagar N.,Gajjar M.** (2013//). Transfusion transmitted infections in patients with hemophilia: A study from a tertiary care hospital in western India *Internet Journal of Infectious Diseases*, 12(1), no pagination

**Mizui M.,Moriya T.,Yoshizawa H.,Kondo M.,Saito T.,Imai M.,Nishioka K.** (1994//). A novel

agglutination method for screening of HIV and HCV antibody testing with 5-mul reagents: Reduction of cost and time with high sensitivity *Vox Sanguinis*, 67(3), 315

**Mizuno S.,Nakatani K.,Muraki Y.,Tanemura A.,Azumi Y.,Kuriyama N.,Ohsawa I.,Kishiwada M.,Usui M.,Sakurai H.,Tabata M.,Okuda M.,Nobori T.,Isaji S.** (2013//). Combination assays for evaluation of immune function and CYP3A5 genotype to identify the risk of infectious complications and mortality in living donor liver transplant patients *Annals of Transplantation*, 18(1), 349

**Moennig V.,Schagemann G.,Dahle J.,Greiser-Wilke I.,Leder L.** (1990//). A new approach for the diagnosis of hog cholera *DTW. Deutsche tierärztliche Wochenschrift*, 97(2), 91

**Mohamed A.A.,Hashem A.,Yassin A.S.,Elhousseiny E.M.,Saleh M.A.,Ahmed O.A.,Shabana S.S.,Ezzat O.** (2015//). Human aldehyde dehydrogenase (ALDH) in cirrhotic and hepatocellular carcinoma patients related to hepatitis C virus *Journal of Gastroenterology and Hepatology Research*, 4(10), 1792

**Mohammadali F.,Pourfathollah A.A.** (2014//). Changes in frequency of HBV, HCV, HIV and syphilis infections among blood donors in Tehran province 2005-2011 *Archives of Iranian Medicine*, 17(9), 613

**Mohammed H.,Linnen J.M.,Muhoz-Jorddn J.L.,Tomashek K.,Foster G.,Broulik A.S.,Petersen L.,Stramer S.L.** (2008//). Dengue virus in blood donations, Puerto Rico, 2005 *Transfusion*, 48(7), 1348

**Mohan K.V.,Murugavel K.G.,Rajanikanth,Mathews S.,Raghuram K.,Rajasambandam P.,Murali A.,Srinivas U.,Mathiazhagan,Palaniswamy K.R.,Panda S.K.,Thyagarajan S.P.** (1999//). Diagnosis of hepatitis C virus infection by ELISA, RIBA and RT-PCR: a comparative evaluation *Indian journal of gastroenterology : official journal of the Indian Society of Gastroenterology*, 18(2), 73

**Montebugnoli L.,Dolci G.** (2000//). Anti-HCV antibodies are detectable in the gingival crevicular fluid of HCV positive subjects *Minerva stomatologica*, 49(1-2), 1

**Moradi A.,Khodabakhshi B.,Sadeghipour M.,Besharat S.,Tabarraei A.** (2011//). Concurrent infections of hepatitis C and HIV in hepatitis B patients in the north-east of Iran *Tropical Doctor*, 41(3), 129

**Moretti M.,Pieretti B.,Masucci A.,Sisti D.,Rocchi**

- M., Delprete E.** (2012//). Role of signal-to-cutoff ratios in hepatitis C virus antibody detection *Clinical and Vaccine Immunology*, 19(8), 1329
- Morgensztern D., Rosado M.F., Silva O., Santos E.S., Abdullah S.A., Goodman M., Hamilton-Nelson K., Rosenblatt J.D., Lossos I.S.** (2004//). Prevalence of hepatitis C infection in patients with non-Hodgkin's lymphoma in South Florida and review of the literature *Leukemia and Lymphoma*, 45(12), 2459
- Morrison B.J., Labo N., Miley W.J., Whitby D.** (2015//). Serodiagnosis for tumor viruses *Seminars in Oncology*, 42(2), 191
- Mousa N., Abdel-Razik A., El-Nahas H., El-Shazly A., Abdelaziz M., Nabih M., Hamed M., Eissa M., Effat N., Eldars W.** (2014//). Cryptosporidiosis in patients with diarrhea and chronic liver diseases *Journal of Infection in Developing Countries*, 8(12), 1584
- Moussa M.B., Barguelli F., Bouziani A., Amor A.** (2003//). Comparison of two hepatitis C virus typing assays in a tunisian population *Annales de Biologie Clinique*, 61(2), 234
- Muhammad S.K., Gurbakshani K.M., Shaikh B.A.** (2012//). Association of hepatitis (B, C & D) viral infection to gallstones in cirrhosis of liver *Medical Forum Monthly*, 23(9), 3
- Mujeeb S.A., Shahab S., Hyder A.A.** (2000//). Geographical display of health information: Study of hepatitis C infection in Karachi, Pakistan *Public Health*, 114(5), 413
- Mukherjee R., Burns A., Rodden D., Chang F., Chaum M., Garcia N., Bollipalli N., Niemz A.** (2015//). Diagnosis and Management of Hepatitis C Virus Infection *Journal of Laboratory Automation*, 20(5), 519
- Mulyanto, S Suwignyo, S Tsaury, K Itoh, M Mizui, F Tsuda, H Okamoto, H Yoshizawa, S Mishiro** (1996//). An easy dipstick assay for anti-core antibodies to screen blood donors for hepatitis C virus viremia. *Vox sanguinis*, 70(4), 229
- Murakami S., Takahashi Y., Yoshida S., Fuke I., Ohmae K., Mori C., Takagi M., Takamizawa A., Okayama H.** (1994//). Highly sensitive detection of viral RNA genomes in blood specimens by an optimized reverse transcription-polymerase chain reaction *Journal of Medical Virology*, 43(2), 175
- M B Carvalho, N Hamerschlak, R S Vaz, O C Jr Ferreira** (1996//). Risk factor analysis and serological diagnosis of HIV-1/HIV-2 infection in a Brazilian blood donor population: validation of the World Health Organization strategy for HIV testing. *AIDS (London, England)*, 10(10), 1135
- M Bes, S Sauleda, I Campos-Varela, F Rodriguez-Frias, N Casamitjana, M Homs, M Piron, J Quer, D Tabernerero, J Guardia, L Puig, J I Esteban** (2012//). IL28B genetic variation and hepatitis C virus-specific CD4(+) T-cell responses in anti-HCV-positive blood donors. *Journal of viral hepatitis*, 19(12), 867
- M Bonacini, H J Lin, F B Hollinger** (2001//). Effect of coexisting HIV-1 infection on the diagnosis and evaluation of hepatitis C virus. *Journal of acquired immune deficiency syndromes (1999)*, 26(4), 340
- M C Divano, A Parodi, A Reborra** (1992//). Lichen planus, liver kidney microsomal (LKM1) antibodies and hepatitis C virus antibodies. *Dermatology (Basel, Switzerland)*, 185(2), 132
- M Casato, D Lilli, G Donato, M Granata, V Conti, G Del Giudice, D Rivanera, C Scagnolari, G Antonelli, M Fiorilli** (2003//). Occult hepatitis C virus infection in type II mixed cryoglobulinaemia. *Journal of viral hepatitis*, 10(6), 455
- M Castella, G Tenderich, M M Koerner, L Arusoglu, A El-Banayosy, U Schulz, B Schulze, S Schulte-Eistrup, C Wolff, K Minami, R Koerfer** (2001//). Outcome of heart transplantation in patients previously infected with hepatitis C virus. *The Journal of heart and lung transplantation : the official publication of the International Society for Heart Transplantation*, 20(5), 595
- M Chen, M Sallberg, A Sonnerborg, O Weiland, L Mattsson, L Jin, A Birkett, D Peterson, D R Milich** (1999//). Limited humoral immunity in hepatitis C virus infection. *Gastroenterology*, 116(1), 135
- M Contreras, J A Barbara, C C Anderson, E Ranasinghe, C Moore, M T Brennan, D R Howell, S Aloysius, A Yardumian** (1991//). Low incidence of non-A, non-B post-transfusion hepatitis in London confirmed by hepatitis C virus serology. *Lancet (London, England)*, 337(8744), 753
- M da S Cardoso, S Epple, K Koerner, B Kubanek, D Ellbruck, E Seifried** (1991//). Investigating the presence of HIV sequences and the distribution of virological markers in hemophiliacs and their sexual partners. *Annals of hematology*, 63(6), 315
- M da Silva Cardoso, D Sturm, K Koerner, T Dengler, M Kerowgan, B Kubanek** (1997//). Anti-HCV envelope prevalence in blood donors from Baden-Wuerttemberg. *Annals of hematology*, 74(3), 135

**M da Silva Cardoso, K Siemoneit, D Sturm, C Krone, D Moradpour, B Kubanek** (1998//). Isolation and characterization of human monoclonal antibodies against hepatitis C virus envelope glycoproteins. *Journal of medical virology*, 55(1), 28

**M de Medina, M Ashby, V Schluter, M Hill, B Leclercq, J P Pennell, L J Jeffers, K R Reddy, E R Schiff, G Hess, G O Perez** (1998//). Prevalence of hepatitis C and G virus infection in chronic hemodialysis patients. *American journal of kidney diseases : the official journal of the National Kidney Foundation*, 31(2), 224

**M de Medina, S LaRue, M Hill, H O'Sullivan, J P Pennell, B Leclercq, X Li, L Jeffers, T Parker, K R Reddy, E R Schiff, G O Perez** (1997//). Quantitative detection of hepatitis C virus RNA in patients undergoing hemodialysis. *ASAIO journal (American Society for Artificial Internal Organs : 1992)*, 43(1), 19

**M E Lai, A P Mazzoleni, P Farci, A Melis, A Porru, G Orgiana, M Arnone, A Balestrieri** (1993//). Markers of hepatitis C virus infection in Sardinian blood donors: relationship with alanine aminotransferase levels. *Journal of medical virology*, 41(4), 282

**M E Lai, S De Virgili, F Argioli, P Farci, A P Mazzoleni, V Lisci, M Rapicetta, M G Clemente, P Nurchis, M Arnone** (1993//). Evaluation of antibodies to hepatitis C virus in a long-term prospective study of posttransfusion hepatitis among thalassemic children: comparison between first- and second-generation assay. *Journal of pediatric gastroenterology and nutrition*, 16(4), 458

**M E Singer, Z M Younossi** (2001//). Cost effectiveness of screening for hepatitis C virus in asymptomatic, average-risk adults. *The American journal of medicine*, 111(8), 614

**M Enomoto, S Nishiguchi, S Shiomi, M Tanaka, K Fukuda, T Ueda, A Tamori, D Habu, T Takeda, Y Yano, S Otani** (2001//). Comparison of real-time quantitative polymerase chain reaction with three other assays for quantitation of hepatitis C virus. *Journal of gastroenterology and hepatology*, 16(8), 904

**M F Yuen, C K Hui, J C Yuen, J L Young, C L Lai** (2001//). The accuracy of SM-HCV rapid test for the detection of antibody to hepatitis C virus. *The American journal of gastroenterology*, 96(3), 838

**M Feitelson, L Lega, J Guo, M Resti, M E Rossi, C Azzari, B S Blumberg, A Vierucci** (1994//). Pathogenesis of posttransfusion viral hepatitis in

children with beta-thalassemia. *Hepatology (Baltimore, Md.)*, 19(3), 558

**M Francois, F Dubois, D Brand, Y Bacq, C Guerois, C Mouchet, J Tichet, A Goudeau, F Barin** (1993//). Prevalence and significance of hepatitis C virus (HCV) viremia in HCV antibody-positive subjects from various populations. *Journal of clinical microbiology*, 31(5), 1189

**M Fusconi, A Vannini, A C Dall'Aglio, G Pappas, F Cassani, G Ballardini, M Frisoni, A Grassi, F B Bianchi, D Zauli** (2005//). Anti-cyclic citrullinated peptide antibodies in type 1 autoimmune hepatitis. *Alimentary pharmacology & therapeutics*, 22(10), 951

**M I Merican** (1992//). Hepatitis C: an update. *The Medical journal of Malaysia*, 47(3), 158

**M J Nowicki, T R Welch, N Ahmad, I K Kuramoto, E C Mendoza, J B Zeldis, B M Baroudy, W F Balistreri** (1995//). Absence of hepatitis B and C viruses in pediatric idiopathic membranoproliferative glomerulonephritis. *Pediatric nephrology (Berlin, Germany)*, 9(1), 16

**M Jadoul, C Cornu, C van Ypersele de Strihou** (1993//). Incidence and risk factors for hepatitis C seroconversion in hemodialysis: a prospective study. The UCL Collaborative Group. *Kidney international*, 44(6), 1322

**M Janier, F Lassau, J Bloch, E Spindler, P Morel, P Gerard, A Aufrere** (1999//). Seroprevalence of herpes simplex virus type 2 antibodies in an STD clinic in Paris. *International journal of STD & AIDS*, 10(8), 522

**M K Arababadi, A A Pourfathollah, A Jafarzadeh, G Hassanshahi, M Salehi, B N Ahmadabadi, D Kennedy** (2011//). Hepatitis B virus genotype, HBsAg mutations and co-infection with HCV in occult HBV infection. *Clinics and research in hepatology and gastroenterology*, 35(8-9), 554

**M K Hourfar, L A Walch, G Geusendam, T Dengler, K Janetzko, K Gubbe, K Frank, A Karl, M Lohr, W Sireis, E Seifried, M Schmidt** (2009//). Sensitivity and specificity of Anti-HBc screening assays--which assay is best for blood donor screening?. *International journal of laboratory hematology*, 31(6), 649

**M Kimura, K I Tatsumi, H Tada, M Ikemoto, Y Fukuda, A Kaneko, M Kato, Y Hidaka, N Amino** (2000//). Enzyme immunoassay for autoantibodies to human liver-type arginase and its clinical application. *Clinical chemistry*, 46(1), 112

**M Kobayashi, K Chayama, Y Arase, A Tsubota, S**

- Saitoh, Y Suzuki, M Kobayashi, K Ikeda, M Matsuda, H Koike, M Hashimoto, H Kumada** (1999//). Enzyme-linked immunosorbent assay to detect hepatitis C virus serological groups 1 to 6. *Journal of gastroenterology*, 34(4), 505
- M Krajden** (2000//). Hepatitis C virus diagnosis and testing. *Canadian journal of public health = Revue canadienne de sante publique*, 91 Suppl 1(#issue#), S34
- M Krajden, F Bishai, C Quan, J Mahony, J Brunton, D Rootman, J Zhao, W Lau, G Snell, J Maurer, S Kesten, D Colby** (1995//). Multi-organ donor transmission of hepatitis C virus to five solid organ transplant recipients and lack of transmission to corneal transplant recipients. *Clinical and diagnostic virology*, 3(2), 113
- M Krajden, J Zhao, C Bourke, V Scalia, P Gill, W Lau** (1996//). Detection of hepatitis C virus by PCR in second-generation enzyme immunoassay-seropositive blood donors by using matched pairs of fresh frozen plasma and pilot tube sera. *Journal of clinical microbiology*, 34(9), 2191
- M Leruez-Ville, Q T Nguyen, P Cohen, S Cocco, M Nouyou, F Ferriere, P Deny** (1998//). Large-scale analysis of hepatitis C virus serological typing assay: effectiveness and limits. *Journal of medical virology*, 55(1), 18
- M Luppi, M Grazia Ferrari, G Bonaccorsi, G Longo, F Narni, P Barozzi, R Marasca, C Mussini, G Torelli** (1996//). Hepatitis C virus infection in subsets of neoplastic lymphoproliferations not associated with cryoglobulinemia. *Leukemia*, 10(2), 351
- M Makuwa, S Souquiere, P Telfer, E Leroy, O Bourry, P Rouquet, S Clifford, E J Wickings, P Roques, F Simon** (2003//). Occurrence of hepatitis viruses in wild-born non-human primates: a 3 year (1998-2001) epidemiological survey in Gabon. *Journal of medical primatology*, 32(6), 307
- M Maniez-Montreuil, F Dubois** (2000//). [Interpretation of hepatitis C virus serology: immunoblot and genome amplification]. *Transfusion clinique et biologique : journal de la Societe francaise de transfusion sanguine*, 7 Suppl 1(#issue#), 25s
- M Moorthy, H D Daniel, G Kurian, P Abraham** (2008//). An evaluation of saliva as an alternative to plasma for the detection of hepatitis C virus antibodies. *Indian journal of medical microbiology*, 26(4), 327
- M N al Nasser** (1992//). Intrafamilial transmission of hepatitis C virus (HCV): a major mode of spread in the Saudi Arabia population. *Annals of tropical paediatrics*, 12(2), 211
- M Nishioka, S A Morshed, K Kono, T Himoto, S Parveen, K Arima, S Watanabe, M P Manns** (1997//). Frequency and significance of antibodies to P450IID6 protein in Japanese patients with chronic hepatitis C. *Journal of hepatology*, 26(5), 992
- M Nishioka, S A Morshed, S Parveen, K Kono, H Matsuoka, M P Manns** (1997//). Antibodies to P450IID6, SLA, PDH-E2 and BCKD-E2 in Japanese patients with chronic hepatitis. *Journal of gastroenterology and hepatology*, 12(12), 862
- M Ohmiya, J Hayashi, N Furusyo, K Ueno, Y Kishihara, S Nabeshima, S Kashiwagi** (1997//). Large dose natural interferon alpha therapy for patients with chronic hepatitis C. *Fukuoka igaku zasshi = Hukuoka acta medica*, 88(12), 380
- M Oketani, H Kawabata, S Imamura, E Maeda, H Tsubouchi, T Arima** (1993//). Development of a specific enzyme-linked immunosorbent assay for the hepatitis C virus antibody using clone 14. *Gastroenterologia Japonica*, 28(1), 56
- M P Busch, J C Wilber, P Johnson, L Tobler, C S Evans** (1992//). Impact of specimen handling and storage on detection of hepatitis C virus RNA. *Transfusion*, 32(5), 420
- M P Busch, K K Watanabe, J W Smith, S W Hermansen, R A Thomson** (2000//). False-negative testing errors in routine viral marker screening of blood donors. For the Retrovirus Epidemiology Donor Study. *Transfusion*, 40(5), 585
- M Pirisi, P Ferroni, C Fabris, P Toniutto, G Soardo, D Vitulli, V Gasparini, E Bartoli** (1995//). Anti-envelope antibodies in anti-hepatitis C virus (HCV) positive patients with and without liver disease. *Infection*, 23(1), 24
- M Psychogiou, A Katsoulidou, E Vaindirli, B Francis, S R Lee, A Hatzakis** (1997//). Immunologic events during the incubation period of hepatitis C virus infection: the role of antibodies to E2 glycoprotein. Multicentre Hemodialysis Cohort Study on Viral Hepatitis. *Transfusion*, 37(8), 858
- M Puoti, A Zonaro, A Ravaggi, M G Marin, F Castelnuovo, E Cariani** (1992//). Hepatitis C virus RNA and antibody response in the clinical course of acute hepatitis C virus infection. *Hepatology (Baltimore, Md.)*, 16(4), 877
- M R Biasin, G Fiordalisi, I Zanella, A Cavicchini, G Marchelle, D Infantolino** (1997//). A DNA

hybridization method for typing hepatitis C virus genotype 2c. *Journal of virological methods*, 65(2), 307

**M Rioche, P Dubreuil, A Kouassi-Samgare, V Akran, P Nordmann, J Pillot** (1997//). [Incidence of sporadic hepatitis E in Ivory Coast based on still problematic serology]. *Bulletin of the World Health Organization*, 75(4), 349

**M Roggendorf, M Lu, H Meisel, M Riffelmann, E Schreier, S Viazov** (1996//). Rational use of diagnostic tools in hepatitis C. *Journal of hepatology*, 24(2 Suppl), 26

**M Saito, A Hasegawa, T Kashiwakuma, M Kohara, M Sugi, K Miki, T Yamamoto, H Mori, Y Ohta, E Tanaka** (1992//). Performance of an enzyme-linked immunosorbent assay system for antibodies to hepatitis C virus with two new antigens (c11/c7). *Clinical chemistry*, 38(12), 2434

**M Tacke, K Kiyosawa, K Stark, V Schlueter, B Ofenloch-Haehnle, G Hess, A M Engel** (1997//). Detection of antibodies to a putative hepatitis G virus envelope protein. *Lancet (London, England)*, 349(9048), 318

**M Tacke, S Schmolke, V Schlueter, S Sauleda, J I Esteban, E Tanaka, K Kiyosawa, H J Alter, U Schmitt, G Hess, B Ofenloch-Haehnle, A M Engel** (1997//). Humoral immune response to the E2 protein of hepatitis G virus is associated with long-term recovery from infection and reveals a high frequency of hepatitis G virus exposure among healthy blood donors. *Hepatology (Baltimore, Md.)*, 26(6), 1626

**M Tordjeman, V Rabillon, D Abouth, C Trepo, A Hoffenbach, G Somme** (1993//). Specific detection of anti-HBc antibodies with an enzyme immunoassay using recombinant HBcAg and monoclonal antibodies. *Journal of virological methods*, 43(1), 21

**M Tsopanomichalou, M Ergazaki, S Linardopoulos, E Kouroumalis, D Spandidos** (1997//). Detection of hepatitis C virus in sera and genotyping according to the 5' non-coding region. *Oncology reports*, 4(6), 1171

**M U Mondelli, A Cerino, F Bono, A Cividini, A Maccabruni, M Arico, A Malfitano, G Barbarini, V Piazza, L Minoli** (1994//). Hepatitis C virus (HCV) core serotypes in chronic HCV infection. *Journal of clinical microbiology*, 32(10), 2523

**M U Mondelli, I Zorzoli, A Cerino, A Cividini, M Bissolati, L Segagni, V Perfetti, E Anesi, P Garini, G Merlini** (1998//). Clonality and specificity of cryoglobulins associated with HCV:

pathophysiological implications. *Journal of hepatology*, 29(6), 879

**M Vazquez-Del Mercado, L V Sanchez-Orozco, B A Pauley, J Y F Chan, E K L Chan, A Panduro, M Maldonado Gonzalez, M A Jimenez-Luevanos, B T Martin-Marquez, C A Palafox-Sanchez, I P Davalos-Rodriguez, M Salazar-Paramo, L Gonzalez-Lopez, J I Gamez-Nava, M Satoh** (2010//). Autoantibodies to a miRNA-binding protein Argonaute2 (Su antigen) in patients with hepatitis C virus infection. *Clinical and experimental rheumatology*, 28(6), 842

**M W Fried, J O Draguesku, M Shindo, L H Simpson, S M Banks, J H Hoofnagle, A M Di Bisceglie** (1993//). Clinical and serological differentiation of autoimmune and hepatitis C virus-related chronic hepatitis. *Digestive diseases and sciences*, 38(4), 631

**M Warny, R Brenard, C Cornu, J P Tomasi, A P Geubel** (1993//). Anti-neutrophil antibodies in chronic hepatitis and the effect of alpha-interferon therapy. *Journal of hepatology*, 17(3), 294

**M Watanabe, S Ohkoshi, H Tawaraya, T Miyajima, K Shimotohno, T Kamimura, H Asakura** (1994//). Hepatitis C viral markers in patients who received blood that was positive for hepatitis C virus core antibody, with genetic evidence of hepatitis C virus transmission. *Transfusion*, 34(2), 125

**M Wirz, G Gentili** (1994//). Detection of anti-HCV antibodies in immunoglobulin preparations by recombinant immunoblot assay. *Biologicals : journal of the International Association of Biological Standardization*, 22(1), 7

**M Y Kuo, L J Hahn, C Y Hong, J H Kao, D S Chen** (1993//). Low prevalence of hepatitis C virus infection among dentists in Taiwan. *Journal of medical virology*, 40(1), 10

**M Y Yu, B L Mason, D L Tankersley** (1994//). Detection and characterization of hepatitis C virus RNA in immune globulins. *Transfusion*, 34(7), 596

**M Zaier, M S Gallah, B Houissa, S Abdelkefi, L Ghachem, M Bouslama, H Miled, S Yacoub** (2002//). [Role of ALAT level in preventing post-transfusional hepatitis. Prospective study of 1,180 blood donors in Tunisia]. *La Tunisie medicale*, 80(8), 455

**M Zeremski, J Makeyeva, K Arasteh, D C Des Jarlais, A H Talal** (2012//). Hepatitis C virus-specific immune responses in noninjecting drug users. *Journal of viral hepatitis*, 19(8), 554

**Ma Somsouk, Deston E Langfield, John M Inadomi, Hal F Jr Yee** (2008//). A cost-identification analysis of screening and surveillance of hepatitis C infection in a prospective cohort of dialysis patients. *Digestive diseases and sciences*, 53(4), 1093

**Magali Bouvier-Alias, Keyur Patel, Harel Dahari, Stephanie Beaucourt, Patrick Larderie, Lawrence Blatt, Christophe Hezode, Gaston Picchio, Daniel Dhumeaux, Avidan U Neumann, John G McHutchison, Jean-Michel Pawlotsky** (2002//). Clinical utility of total HCV core antigen quantification: a new indirect marker of HCV replication. *Hepatology (Baltimore, Md.)*, 36(1), 211

**Magdalena Letowska, Ewa Brojer, Maria Mikulska, Agnieszka Gronowska, Aleksandra Rosiek** (2004//). Hepatitis C core antigen in Polish blood donors. *Transfusion*, 44(7), 1067

**Mahdieh Javaherian, Zarin Sharifnia, Robabeh Taheripannah, Mojgan Bandepour, Mohammad Soleimani, Bahram Kazemi** (2014//). Using recombinant Chlamydia trachomatis OMP2 as antigen in diagnostic ELISA test. *Iranian journal of microbiology*, 6(1), 8

**Mahrukh Akbar Shaheen, Muhammad Idrees** (2015//). Evidence-based consensus on the diagnosis, prevention and management of hepatitis C virus disease. *World journal of hepatology*, 7(3), 616

**Mahsa Alaee, Peyman Rajabi, Zohreh Sharifi, Mohammad Morad Farajollahi** (2014//). Immunoreactivity assessment of hepatitis C virus NS3 protease and NS5A proteins expressed in TOPO cloning system. *Journal of microbiology, immunology, and infection = Wei mian yu gan ran za zhi*, 47(4), 282

**Malika Ait-Goughoulte, Tatsuo Kanda, Keith Meyer, Jan S Ryerse, Ratna B Ray, Ranjit Ray** (2008//). Hepatitis C virus genotype 1a growth and induction of autophagy. *Journal of virology*, 82(5), 2241

**Manuel Fuentes, Cesar Mateo, Ana Rodriguez, Mercedes Casqueiro, Juan C Tercero, Hans H Riese, Roberto Fernandez-Lafuente, Jose M Guisan** (2006//). Detecting minimal traces of DNA using DNA covalently attached to superparamagnetic nanoparticles and direct PCR-ELISA. *Biosensors & bioelectronics*, 21(8), 1574

**Marc-Oliver Riener, Frank Stenner, Heike Liewen, Christopher Soll, Stefan Breitenstein, Bernhard Cornelius Pestalozzi, Panagiotis Samaras, Nicole Probst-Hensch, Claus Hellerbrand, Beat Mullhaupt, Pierre-Alain**

**Clavien, Marcus Bahra, Peter Neuhaus, Peter Wild, Florian Fritzsche, Holger Moch, Wolfram Jochum, Glen Kristiansen** (2009//). Golgi phosphoprotein 2 (GOLPH2) expression in liver tumors and its value as a serum marker in hepatocellular carcinomas. *Hepatology (Baltimore, Md.)*, 49(5), 1602

**Marcel Miedouge, Florence Legrand-Abbravanel, Colette Lalanne, Karine Saune, Jacques Izopet** (2009//). Laboratory evaluation of the UniCel DxI 800 analyser (Beckman Coulter) for detecting HBV and HCV serological markers. *Journal of clinical virology : the official publication of the Pan American Society for Clinical Virology*, 44(2), 134

**Marcia Bessa, Itatiana Ferreira Rodart, Gisele Barreto Lopes Menezes, Theomira Mauadi de Azevedo Carmo, Daniel A Athanzio, Mitermayer G Reis** (2009//). Limited evidence of HCV transmission in stable heterosexual couples from Bahia, Brazil. *The Brazilian journal of infectious diseases : an official publication of the Brazilian Society of Infectious Diseases*, 13(4), 262

**Margret Oethinger, Donald R Mayo, JoAnne Falcone, Pankaj K Barua, Brigitte P Griffith** (2005//). Efficiency of the ortho VITROS assay for detection of hepatitis C virus-specific antibodies increased by elimination of supplemental testing of samples with very low sample-to-cutoff ratios. *Journal of clinical microbiology*, 43(5), 2477

**Maria Cristina Medici, Giuliano Furlini, Anna Rodella, Antonio Fuertes, Alessia Monchetti, Adriana Calderaro, Silvia Galli, Luigina Terlenghi, Magdalena Olivares, Patrizia Bagnarelli, Andrea Costantini, Flora De Conto, Maria Sainz, Claudio Galli, Nino Manca, Maria Paola Landini, Giuseppe Dettori, Carlo Chezzi** (2011//). Hepatitis C virus core antigen: analytical performances, correlation with viremia and potential applications of a quantitative, automated immunoassay. *Journal of clinical virology : the official publication of the Pan American Society for Clinical Virology*, 51(4), 264

**Maria F Pirillo, Luciana Bassani, Elena A P Germinario, Maria Grazia Mancini, Joseph Vyankandondera, Pius Okong, Stefano Vella, Marina Giuliano** (2007//). Seroprevalence of hepatitis B and C viruses among HIV-infected pregnant women in Uganda and Rwanda. *Journal of medical virology*, 79(12), 1797

**Maria G Isagulians, Konstantin Iakimtchouk, Natalia V Petrakova, Marina A Yermalovich, Anne Kjerrstrom Zuber, Vladimir I Kashuba, Sergey V Belikov, Soren Andersson, Sergey N Kochetkov, Dennis M Klinman, Britta Wahren** (2004//). Gene immunization may induce

secondary antibodies reacting with DNA. *Vaccine*, 22(11-12), 1576

**Maria G Isagulians, Natalia V Petrakova, Vladislav V Mokhonov, Katja Pokrovskaya, Yulia G Suzdaltzeva, Alexander V Krivonos, Alexei D Zaberezhny, Mansur M Garaev, Valeri D Smirnov, Erik Nordenfelt** (2003//). DNA immunization efficiently targets conserved functional domains of protease and ATPase/helicase of nonstructural 3 protein (NS3) of human hepatitis C virus. *Immunology letters*, 88(1), 1

**Maria J Gomara, Leticia Fernandez, Teresa Perez, Guadalupe Ercilla, Isabel Haro** (2010//). Assessment of synthetic chimeric multiple antigenic peptides for diagnosis of GB virus C infection. *Analytical biochemistry*, 396(1), 51

**Maria J Gomara, Leticia Fernandez, Teresa Perez, Solveig Tenckhoff, Aurora Casanovas, Hans L Tillmann, Isabel Haro** (2011//). Diagnostic value of anti-GBV-C antibodies in HIV-infected patients. *Chemical biology & drug design*, 78(2), 277

**Maria L Lozano, Maria J Candela, Horacio Cano, Isabel Zuazu, Vicente Vicente** (2004//). Detection of free hepatitis C virus core antigen by enzyme-linked immunosorbent assay is not suitable for screening of granulocyte colony-stimulating factor-mobilized hematopoietic progenitor donors. *Transfusion*, 44(12), 1755

**Maria P Dore, Giuseppe Realdi, Daniela Mura, David Y Graham, Antonia R Sepulveda** (2002//). Helicobacter infection in patients with HCV-related chronic hepatitis, cirrhosis, and hepatocellular carcinoma. *Digestive diseases and sciences*, 47(7), 1638

**Marie-Anne Petit, Colette Jolivet-Reynaud, Estelle Peronnet, Yvonne Michal, Christian Trepo** (2003//). Mapping of a conformational epitope shared between E1 and E2 on the serum-derived human hepatitis C virus envelope. *The Journal of biological chemistry*, 278(45), 44385

**Marie-Luise Berres, Beate Schlosser, Thomas Berg, Christian Trautwein, Hermann E Wasmuth** (2012//). Soluble urokinase plasminogen activator receptor is associated with progressive liver fibrosis in hepatitis C infection. *Journal of clinical gastroenterology*, 46(4), 334

**Marion Vermeulen, Nico Lelie, Wendy Sykes, Robert Crookes, Johanna Swanevelder, Lilian Gaggia, Martin Le Roux, Eben Kuun, Sam Gulube, Ravi Reddy** (2009//). Impact of individual-donation nucleic acid testing on risk of

human immunodeficiency virus, hepatitis B virus, and hepatitis C virus transmission by blood transfusion in South Africa. *Transfusion*, 49(6), 1115

**Markus Linnemann, Christoph Geisen, Sabine Menn, Christian Herzberg, Robert Dinsler, Klaus Wielckens** (2002//). Comparison of three dsDNA-ELISAs with regard to their efficiency in the diagnosis of systemic lupus erythematosus. *Clinical laboratory*, 48(1-2), 45

**Martha Minopetrou, Emilia Hadziyannis, Melanie Deutsch, Maria Tampaki, Asimina Georgiadou, Eleni Dimopoulou, Dimitrios Vassilopoulos, John Koskinas** (2013//). Hepatitis C virus (HCV)-related cryoglobulinemia: cryoglobulin type and anti-HCV profile. *Clinical and vaccine immunology : CVI*, 20(5), 698

**Maryam Moini, Mazyar Ziyaeyan, Shapoor Aghaei, Mohammad Mahdi Sagheb, Seyed Alireza Taghavi, Mahsa Moeini, Marzieh Jamalidoust, Laleh Hamidpour** (2013//). Hepatitis C virus (HCV) Infection Rate among Seronegative Hemodialysis Patients Screened by Two Methods; HCV Core Antigen and Polymerase Chain Reaction. *Hepatitis monthly*, 13(6), e9147

**Masahiro Kimura, Ke-ita Tatsumi, Hisato Tada, Yukiko Izumi, Akira Kaneko, Michio Kato, Manabu Masuzawa, Masaki Ikemoto, Yoshiyasu Yabusaki, Yoh Hidaka, Nobuyuki Amino** (2002//). Anti-CYP2D6 antibodies detected by quantitative radioligand assay and relation to antibodies to liver-specific arginase in patients with autoimmune hepatitis. *Clinica chimica acta; international journal of clinical chemistry*, 316(1-2), 155

**Masahito Uemura, Yoshihiro Fujimura, Masanori Matsumoto, Hiromichi Ishizashi, Seiji Kato, Tomomi Matsuyama, Ayami Isonishi, Masatoshi Ishikawa, Masato Yagita, Chie Morioka, Hitoshi Yoshiji, Tatsuhiro Tsujimoto, Norio Kurumatani, Hiroshi Fukui** (2008//). Comprehensive analysis of ADAMTS13 in patients with liver cirrhosis. *Thrombosis and haemostasis*, 99(6), 1019

**Masaya Sugiyama, Tatsuji Kimura, Shigeko Naito, Motokazu Mukaide, Takanori Shinauchi, Masakatsu Ueno, Kiyoaki Ito, Kazumoto Murata, Masashi Mizokami** (2012//). Development of specific and quantitative real-time detection PCR and immunoassays for lambda3-interferon. *Hepatology research : the official journal of the Japan Society of Hepatology*, 42(11), 1089

**Matteo Ruggeri, Silvia Coretti, Antonio Gasbarrini, Americo Cicchetti** (2013//).



Economic assessment of an anti-HCV screening program in Italy. *Value in health : the journal of the International Society for Pharmacoeconomics and Outcomes Research*, 16(6), 965

**Maximilian Schoniger-Hekele, Katrin Ramskogler, Doris Hartl, Otto M Lesch, Christian Muller** (2006//). Exclusion of trisialo-transferrin from carbohydrate-deficient transferrin measurement: advantage in patients with chronic liver disease?. *Wiener medizinische Wochenschrift (1946)*, 156(7-8), 216

**Maysaa El-Sayed Zaki, Mohammad Hosam El-Deen Zaghloul, Othman El Sayed** (2006//). Acute sporadic hepatitis E in children: diagnostic relevance of specific immunoglobulin M and immunoglobulin G compared with nested reverse transcriptase PCR. *FEMS immunology and medical microbiology*, 48(1), 16

**Mehnaaz Sultan Khuroo, Naira Sultan Khuroo, Mohammad Sultan Khuroo** (2015//). Diagnostic accuracy of point-of-care tests for hepatitis C virus infection: a systematic review and meta-analysis. *PloS one*, 10(3), e0121450

**Meital Gal-Tanamy, Romy Zemel, Yevgeny Berdichevsky, Larissa Bachmatov, Ran Tur-Kaspa, Itai Benhar** (2005//). HCV NS3 serine protease-neutralizing single-chain antibodies isolated by a novel genetic screen. *Journal of molecular biology*, 347(5), 991

**Mel Krajden, Rainer Ziermann, Asphani Khan, Annie Mak, Kimmy Leung, David Hendricks, Lorraine Comanor** (2002//). Qualitative detection of hepatitis C virus RNA: comparison of analytical sensitivity, clinical performance, and workflow of the Cobas Amplicor HCV test version 2.0 and the HCV RNA transcription-mediated amplification qualitative assay. *Journal of clinical microbiology*, 40(8), 2903

**Michael Eisenhut** (2013//). Neopterin in Diagnosis and Monitoring of Infectious Diseases. *Journal of biomarkers*, 2013(#issue#), 196432

**Michael P Busch, Simone A Glynn, Susan L Stramer, D Michael Strong, Sally Caglioti, David J Wright, Brandee Pappalardo, Steven H Kleinman, NHLBI-REDS NAT Study Group** (2005//). A new strategy for estimating risks of transfusion-transmitted viral infections based on rates of detection of recently infected donors. *Transfusion*, 45(2), 254

**Michela E Burlone, Andrea Cerutti, Rosalba Minisini, Carlo Smirne, Elisa Boccato, Elisa Ceriani, Giovanni Rizzo, Olivia Bargiacchi, Simone Bocchetta, Giuseppe Occhino, Mario**

**Pirisi** (2013//). IL28B polymorphism, blood interferon-alpha concentration, and disease stage of HCV mono-infected and HCV-HIV co-infected patients. *Current HIV research*, 11(1), 50

**Minxin Wang, Xiaojing Zou, Deying Tian, Song Hu, Libin Jiang** (2015//). Role of Dendritic Cell-Specific ICAM-3-Grabbing Nonintegrin on Dendritic Cells in the Recognition of Hepatitis B Virus. *Viral immunology*, 28(6), 331

**Mohamed Hashem, Hanaa El-Karaksy, Mohamed T Shata, Maha Sobhy, Heba Helmy, Suzan El-Naghi, Gehan Galal, Zainab Z Ali, Gamal Esmat, Sayed F Abdelwahab, G Thomas Strickland, Samer S El-Kamary** (2011//). Strong hepatitis C virus (HCV)-specific cell-mediated immune responses in the absence of viremia or antibodies among uninfected siblings of HCV chronically infected children. *The Journal of infectious diseases*, 203(6), 854

**Mohamed R El-Shanshory, Ibrahim A Kabbash, Hanan H Soliman, Hala M Nagy, Said H Abdou** (2013//). Prevalence of hepatitis C infection among children with beta-thalassaemia major in Mid Delta, Egypt: a single centre study. *Transactions of the Royal Society of Tropical Medicine and Hygiene*, 107(4), 224

**Mohammad Ali Assarehzadegan, Mehri Ghafourian Boroujerdnia, Khodamorad Zandian** (2012//). Prevalence of hepatitis B and C infections and HCV genotypes among haemophilia patients in ahvaz, southwest iran. *Iranian Red Crescent medical journal*, 14(8), 470

**Mohammad Javad Zahedi, Sodaif Darvish Moghaddam, Seyed Moayed Alavian, Mahdieh Dalili** (2012//). Seroprevalence of Hepatitis Viruses B, C, D and HIV Infection Among Hemodialysis Patients in Kerman Province, South-East Iran. *Hepatitis monthly*, 12(5), 339

**Mohammad Mehdi Mir-Nasseri, Ashraf Mohammadkhani, Hamid Tavakkoli, Esmaeil Ansari, Hossein Poustchi** (2011//). Incarceration is a major risk factor for blood-borne infection among intravenous drug users: Incarceration and blood borne infection among intravenous drug users. *Hepatitis monthly*, 11(1), 19

**Mostafa K El Awady, Maha A El-Demellawy, Samy B Khalil, Dalia Galal, Said A Goueli** (2002//). Synthetic peptide-based immunoassay as a supplemental test for HCV infection. *Clinica chimica acta; international journal of clinical chemistry*, 325(1-2), 39

**Mostafa K El Awady, Yasmine S El Abd, Hussein A Shoeb, Ashraf A Tabll, Alaa El Din M S Hosny,**

**Reem M El Shenawy, Khaled Atef, Noha G Bader El Din, Mahmoud M Bahgat** (2006//). Circulating viral core and E1 antigen levels as supplemental markers for HCV chronic hepatitis. *Virology journal*, 3(#issue#), 67

**Mt Cabezas-Fernandez, Mi Cabeza-Barrera** (2012//). Introduction of an automated system for the diagnosis and quantification of hepatitis B and hepatitis C viruses. *The open virology journal*, 6(#issue#), 122

**Muhammad Idrees** (2008//). Development of an improved genotyping assay for the detection of hepatitis C virus genotypes and subtypes in Pakistan. *Journal of virological methods*, 150(1-2), 50

**Muhammad Z Yousaf, Muhammad Idrees, Zafar Saleem, Irshad U Rehman, Muhammad Ali** (2011//). Expression of core antigen of HCV genotype 3a and its evaluation as screening agent for HCV infection in Pakistan. *Virology journal*, 8(#issue#), 364

**Myeong Hee Kim, So Young Kang, Woo In Lee** (2013//). Evaluation of a new rapid test kit to detect hepatitis C virus infection. *Journal of virological methods*, 193(2), 379

**N Abuaf, F Lunel, P Giral, E Borotto, S Laperche, R Poupon, P Opolon, J M Hureau, J C Homberg** (1993//). Non-organ specific autoantibodies associated with chronic C virus hepatitis. *Journal of hepatology*, 18(3), 359

**N Agarwal, K Chatterjee, P Coshic, M Borgohain** (2013//). Nucleic acid testing for blood banks: an experience from a tertiary care centre in New Delhi, India. *Transfusion and apheresis science : official journal of the World Apheresis Association : official journal of the European Society for Haemapheresis*, 49(3), 482

**N Berry, A Chakravarti, P Kar, B C Das, Santhanam, M D Mathur** (1998//). Association of hepatitis C virus & hepatitis B virus in chronic liver disease. *The Indian journal of medical research*, 108(#issue#), 255

**N C Tassopoulos, A Hatzakis, I Delladetsima, M G Koutelou, A Todoulos, V Miriagou** (1992//). Role of hepatitis C virus in acute non-A, non-B hepatitis in Greece: a 5-year prospective study. *Gastroenterology*, 102(3), 969

**N Campo, R Brizzolara, N Sinelli, F Torre, R Russo, G Deferrari, A Picciotto** (2000//). TT virus infection in haemodialysis patients. *Nephrology, dialysis, transplantation : official publication of the European Dialysis and Transplant Association -*

*European Renal Association*, 15(11), 1823

**N Choudhury, Sunita Tulsiani, Priti Desai, Ripal Shah, Ankit Mathur, V Harimoorthy** (2011//). Serial follow-up of repeat voluntary blood donors reactive for anti-HCV ELISA. *Asian journal of transfusion science*, 5(1), 26

**N Choudhury, V Ramesh, S Saraswat, S Naik** (1995//). Effectiveness of mandatory transmissible diseases screening in Indian blood donors. *The Indian journal of medical research*, 101(#issue#), 229

**N de Leeuw, W J Melchers, A H Balk, N de Jonge, J M Galama** (1999//). Study on microbial persistence in end-stage idiopathic dilated cardiomyopathy. *Clinical infectious diseases : an official publication of the Infectious Diseases Society of America*, 29(3), 522

**N Kerkar, Y Ma, M Hussain, L Muratori, C Targett, R Williams, F B Bianchi, G Mieli-Vergani, D Vergani** (1999//). A novel assay for detecting antibodies to cytochrome P4502D6, the molecular target of liver kidney microsomal antibody type 1. *Journal of immunological methods*, 223(2), 227

**N L Arnold, B A Slade, M M Jones, M A Popovskiy** (1994//). Donor follow-up of influenza vaccine-related multiple viral enzyme immunoassay reactivity. *Vox sanguinis*, 67(2), 191

**N Penton, A Musacchio, J M Rivera, J Roca, M Ponce, D Rodriguez, A Caballero, Y I Tallo, R E Narciandi** (2003//). Antigenicity of a recombinant NS3 protein representative of ATPase/helicase domain from hepatitis C virus. *Clinical biochemistry*, 36(1), 41

**N S Silverman, M Snyder, R L Hodinka, P McGillen, G Knee** (1995//). Detection of hepatitis C virus antibodies and specific hepatitis C virus ribonucleic acid sequences in cord bloods from a heterogeneous prenatal population. *American journal of obstetrics and gynecology*, 173(5), 1396

**N Yuki, N Hayashi, H Hagiwara, T Takehara, M Oshita, A Kasahara, H Fusamoto, T Kamada** (1993//). Serodiagnosis of chronic hepatitis C in Japan by second-generation recombinant immunoblot assay. *Journal of hepatology*, 17(2), 170

**N Yuki, N Hayashi, H Hagiwara, T Takehara, M Oshita, A Kasahara, H Fusamoto, T Kamada** (1992//). Improved serodiagnosis of chronic hepatitis C in Japan by a second-generation enzyme-linked immunosorbent assay. *Journal of medical virology*, 37(3), 237

**Nada Vasiljevic, Nevena Veljkovic, Tatjana Kosec, Xue-Zhong Ma, Sanja Glisic, Jelena Prljic, Ana Djordjevic Vujicic, Ljiljana Markovic, Donald R Branch** (2011//). A bioinformatics approach to identify natural autoantibodies from healthy blood donors' sera reactive with the HCV NS5A-derived peptide by immunoassay. *Viral immunology*, 24(2), 69

**Naicui Zhai, Xiumei Chi, Tianyang Li, Hongxiao Song, Haijun Li, Xia Jin, Ian Nicholas Crispe, Lishan Su, Junqi Niu, Zhengkun Tu** (2015//). Hepatitis C virus core protein triggers expansion and activation of CD4(+)CD25(+) regulatory T cells in chronic hepatitis C patients. *Cellular & molecular immunology*, 12(6), 743

**Nasar Khan, Muhammad Akmal, Muhammad Hayat, Muhammad Umar, Atta Ullah, Iqbal Ahmed, Kashif Rahim, Sadar Ali, Sulaiman Bahadar, Shamim Saleha** (2014//). Geographical distribution of hepatitis C virus genotypes in Pakistan. *Hepatitis monthly*, 14(10), e20299

**Natalie C Weber, Michael E Klepser, Julie M Akers, Donald G Klepser, Alex J Adams** (2016//). Use of CLIA-waived point-of-care tests for infectious diseases in community pharmacies in the United States. *Expert review of molecular diagnostics*, 16(2), 253

**Nawal Abd EL-Baky, Sanaa H Omar, Horeya EL-Badry, El-Rashdy M Redwan** (2008//). Efficacy comparison of gel-based, membrane and glass array techniques to detect human antibodies isotypes among the Egyptian HCV-patients. *Human antibodies*, 17(3-4), 63

**Ndieme Ndongo, Pascale Berthillon, Pierre Pradat, Claude Vieux, Isabelle Bordes, Francoise Berby, Marianne Maynard, Fabien Zoulim, Christian Trepo, Marie-Anne Petit** (2010//). Association of anti-E1E2 antibodies with spontaneous recovery or sustained viral response to therapy in patients infected with hepatitis C virus. *Hepatology (Baltimore, Md.)*, 52(5), 1531

**Neeraj Shah, Anupa Mishra, Dhaval Chauhan, C Vora, N R Shah** (2010//). Study on effectiveness of transfusion program in thalassemia major patients receiving multiple blood transfusions at a transfusion centre in Western India. *Asian journal of transfusion science*, 4(2), 94

**Nelson Acosta-Rivero, Santiago Duenas-Carrera, Liz Alvarez-Lajonchere, Juan Morales-Grillo** (2004//). HCV core protein-expressing DNA vaccine induces a strong class I-binding peptide DTH response in mice. *Biochemical and biophysical research communications*, 314(3), 781

**Nick E Spanakis, George A Garinis, Evangelos C Alexopoulos, George P Patrinos, Panayotis G Menounos, Alexandra Sklavounou, Evangelos N Manolis, Vassilis G Gorgoulis, Dimitrios Valis** (2002//). Cytokine serum levels in patients with chronic HCV infection. *Journal of clinical laboratory analysis*, 16(1), 40

**Nicola Coppola, Raffaella Pisapia, Gilda Tonziello, Addolorata Masiello, Salvatore Martini, Mariantonietta Pisaturo, Vincenzo Messina, Caterina Sagnelli, Margherita Macera, Giuseppe Signoriello, Evangelista Sagnelli** (2009//). Improvement in the aetiological diagnosis of acute hepatitis C: a diagnostic protocol based on the anti-HCV-IgM titre and IgG Avidity Index. *Journal of clinical virology : the official publication of the Pan American Society for Clinical Virology*, 46(3), 222

**Nidhi Subhash Chandra, Asha Sharma, Ramesh Roop Rai, Bharti Malhotra** (2012//). Contribution of hepatitis E virus in acute sporadic hepatitis in north western India. *The Indian journal of medical research*, 136(3), 477

**Ning Wang, Xue-Qin Gao, Jin-Xiang Han** (2004//). Simultaneous detection of HBV and HCV by multiplex PCR normalization. *World journal of gastroenterology*, 10(16), 2439

**Noam Yarom, Nurit Dagon, Eilat Shinar, Meir Gorsky** (2007//). Association between hepatitis C virus infection and oral lichen planus in Israeli patients. *The Israel Medical Association journal : IMAJ*, 9(5), 370

**Noemie Lacroix, Helene Barraud, Claudine Gillet, Paolo Di Patrizio, Jean Pierre Bronowicki, Raymund Schwan, Vincent Laprevote** (2016//). [Which place for point-of-care screening tests in the diagnosis of hepatitis C infection among drug users?]. *Presse medicale (Paris, France : 1983)*, 45(4 Pt 1), 431

**Noha Irani-Hakime, Hanady Samaha, Wassim Almawi, Edgar Nasr, Jacques Mokhbat, Maroun Abou Jaoude, Jocelyn Daccache, Elias Rahal** (2003//). Prevalence of hepatitis C virus isolate genotypes from chronically infected Lebanese patients: a hospital-based study. *Le Journal medical libanais. The Lebanese medical journal*, 51(3), 121

**Noor Muhammad, M Ayub Jan** (2005//). Frequency of hepatitis "C" in Buner, NWFP. *Journal of the College of Physicians and Surgeons--Pakistan : JCPSP*, 15(1), 11

**Norma I Rallon, Vincent Soriano, Susanna Naggie, Clara Restrepo, John McHutchison,**

- Eugenia Vispo, Jose M Benito** (2012//). Impact of IL28B gene polymorphisms on interferon-lambda3 plasma levels during pegylated interferon-alpha/ribavirin therapy for chronic hepatitis C in patients coinfecting with HIV. *The Journal of antimicrobial chemotherapy*, 67(5), 1246
- Nagu T.J.,Bakari M.,Matee M.** (2008//). Hepatitis A, B and C viral co-infections among HIV-infected adults presenting for care and treatment at Muhimbili National Hospital in Dar es Salaam, Tanzania *BMC public health*, 8(#issue#), 416
- Nakagawa T.,Seki T.,Shiro T.,Wakabayashi M.,Itoh T.,Tagawa Y.,Shiozaki Y.,Inoue K.,Okamura A.** (1994//). Usefulness of the high sensitivity PIVKA-II measurement method in diagnosis of hepatocellular carcinoma: A comparison with the conventional method *International Hepatology Communications*, 2(2), 94
- Nakamoto Y.,Kaneko S.,Takizawa H.,Kikumoto Y.,Takano M.,Himeda Y.,Kobayashi K.** (2003//). Analysis of the CD8-positive T cell response in Japanese patients with chronic hepatitis C using HLA-A\*2402 Peptide tetramers *Journal of Medical Virology*, 70(1), 51
- Nakatsuji Y.,Matsumoto A.,Tanaka E.,Ogata H.,Kiyosawa K.** (1992//). Detection of chronic hepatitis C virus infection by four diagnostic systems: First-generation and second-generation enzyme-linked immunosorbent assay, second-generation recombinant immunoblot assay and nested polymerase chain reaction analysis *Hepatology*, 16(2), 300
- Ng Y.-Y.,Lee S.-D.,Wu S.-C.,Liu W.-T.,Chia W.-L.,Huang T.-P.** (1993//). The need for second-generation antihepatitis C virus testing in uremic patients on continuous ambulatory peritoneal dialysis *Peritoneal Dialysis International*, 13(2), 132
- Nielsen M.J.,Kazankov K.,Leeming D.J.,Karsdal M.A.,Krag A.,Barrera F.,McLeod D.,George J.,Gronbaek H.** (2015//). Markers of collagen remodeling detect clinically significant fibrosis in chronic hepatitis C patients *PLoS ONE*, 10(9), no pagination
- Nikolaeva I.A.,Mahboudi F.,Chevalier A.,Khalili G.,Khadem A.,Somova A.V.,Buguruca S.T.,Sidorovich I.G.** (2003//). Evaluation of a New Anti-HIV1/2 ELISA-HIV 1/2 REC Diagnostic Kit Based on E. coli Derived Soluble Recombinant Proteins: Experience of an International Study *Iranian Journal of Medical Sciences*, 28(1), 37
- Noor Haslina M.N.,Khairiah Y.,Zakuan Zainy D.,Shafini M.Y.,Rosnah B.,Marini R.** (2012//). Seroprevalence of hepatitis c virus infection among blood donors in a teaching hospital in northeastern Malaysia *Southeast Asian Journal of Tropical Medicine and Public Health*, 43(3), 668
- O'Brien J.M.,Kruzel K.E.,Wandell M.G.,Vinogradov I.V.,Sheagren J.N.,Frank A.P.** (2001//). Detection of hepatitis C antibody with at-home collection kits using an innovative laboratory algorithm *Infectious Diseases in Clinical Practice*, 10(9), 474
- Okanoue T.,Itoh Y.,Minami M.,Sakamoto S.,Yasui K.,Sakamoto M.,Nishioji K.,Murakami Y.** (1999//). Interferon therapy lowers the rate of progression to hepatocellular carcinoma in chronic hepatitis C but not significantly in an advanced stage: A retrospective study in 1148 patients *Journal of Hepatology*, 30(4), 653
- Okrongly D.** (2004//). The ADVIA Centaur immunoassay system--designed for infectious disease testing *Journal of clinical virology : the official publication of the Pan American Society for Clinical Virology*, 30 Suppl 1(#issue#), S19
- Onuchukwu C.E.,Ojuawo A.,Ernest S.K.** (2013//). Risk factors for hepatitis C virus antibody seropositivity among children with sickle cell Anaemia in Ilorin, Nigeria *African Journal of Clinical and Experimental Microbiology*, 14(3), 127
- Onyekwere C.A.,Hameed L.** (2015//). Hepatitis B and C virus prevalence and association with demographics: report of population screening in Nigeria *Tropical Doctor*, 45(4), 231
- Ooi B.G.,Sinniah M.,Ismail S.,Baharuddin R.** (1996//). Application of the Serodia-HCV particle agglutination for the detection of antibodies to hepatitis C virus *The Malaysian journal of pathology*, 18(2), 89
- O Delpuech, D B Buffello-Le Guillou, E Rubinstein, C Feray, M A Petit** (2001//). The hepatitis C virus (HCV) induces a long-term increase in interleukin-10 production by human CD4+ T cells (H9). *European cytokine network*, 12(1), 69
- O G Shaker, N Hantar, S El-Tahlawi, A El-Tawdi, H El-Hadidi, S Hantar, A El-Refai, R William** (2009//). Detection of myxovirus resistance protein A in lichen planus lesions and its relationship to hepatitis C virus. *The British journal of dermatology*, 160(5), 980
- O Kurauchi, T Furui, A Itakura, H Ishiko, M Sugiyama, Y Ohno, H Ando, A Tanamura, T Ishida, A Nawa** (1993//). Studies on transmission of hepatitis C virus from mother-to-child in the perinatal period. *Archives of gynecology and*

**O Minenkova, N Gargano, A De Tomassi, F Bellintani, A Pucci, P Fortugno, E Fuscaldi, A Pessi, M Rapicetta, M Miceli, P Iudicone, R Cortese, F Felici, P Monaci** (2001//). ADAM-HCV, a new-concept diagnostic assay for antibodies to hepatitis C virus in serum. *European journal of biochemistry / FEBS*, 268(17), 4758

**O O M Daramola, A O George, A O Ogunbiyi** (2002//). Hepatitis C virus and lichen planus in Nigerians: any relationship?. *International journal of dermatology*, 41(4), 217

**O S Khalil, T F Zurek, J Tryba, C F Hanna, R Hollar, C Pepe, K Genger, C Brentz, B Murphy, N Abunimeh** (1991//). Abbott prism: a multichannel heterogeneous chemiluminescence immunoassay analyzer. *Clinical chemistry*, 37(9), 1540

**O V Masalova, S N Atanadze, E I Samokhvalov, N V Petrakova, T I Kalinina, V D Smirnov, Y E Khudyakov, H A Fields, A A Kushch** (1998//). Detection of hepatitis C virus core protein circulating within different virus particle populations. *Journal of medical virology*, 55(1), 1

**Okjin Kim, Sung-Soon Kim, Mi-Sun Park, Soon-Deok Suh, Min-Woo Lee, Ki-Soo Kim, Jae-Deuk Yoon, Joo-Shil Lee** (2003//). Seroprevalence of sexually transmitted viruses in Korean populations including HIV-seropositive individuals. *International journal of STD & AIDS*, 14(1), 46

**Olga Khokhlova, Ara Reizis, Lidya Serebrovskaya, Natalia Gerasimova, Vadim Pokrovskiy** (2014//). Plasmacytoid Dendritic cells (pDCs) in HIV-infected and HIV/HCV-co-infected patients receiving successful treatment. *Journal of the International AIDS Society*, 17(4 Suppl 3), 19642

**Ottavia Spiga, Maria G Padula, Maria Scarselli, Arianna Ciutti, Andrea Bernini, Vincenzo Venditti, Filippo Prischi, Chiara Falciani, Luisa Lozzi, Luisa Bracci, Piero E Valensin, Cinzia Caudai, Neri Niccolai** (2006//). Structurally driven selection of human hepatitis C virus mimotopes. *Antiviral therapy*, 11(7), 917

**P Berthoux, C Dejean, S Cecillon, M Batie, F Berthoux** (1998//). High prevalence of hepatitis G virus (HGV) infection in renal transplantation. *Nephrology, dialysis, transplantation : official publication of the European Dialysis and Transplant Association - European Renal Association*, 13(11), 2909

**P Bjorkman, A Widell, B Veress, H Verbaan, G Hoffmann, S Elmstahl, S Lindgren** (2001//). GB virus C/hepatitis G virus infection in patients

investigated for chronic liver disease and in the general population in southern Sweden. *Scandinavian journal of infectious diseases*, 33(8), 611

**P Bovet, C Yersin, P Herminie, D Lavanchy, P C Frei** (1999//). Decrease in the prevalence of hepatitis B and a low prevalence of hepatitis C virus infections in the general population of the Seychelles. *Bulletin of the World Health Organization*, 77(11), 923

**P Cacoub, N Boukli, P Hausfater, A Garbarg-Chenon, P Ghillani, V Thibault, L Musset, J M Hureau, J C Piette** (1998//). Parvovirus B19 infection, hepatitis C virus infection, and mixed cryoglobulinaemia. *Annals of the rheumatic diseases*, 57(7), 422

**P Coursaget, Y Buisson, N Enogat, R Bercion, J M Baudet, P Delmaire, D Prigent, J Desrame** (1998//). Outbreak of enterically-transmitted hepatitis due to hepatitis A and hepatitis E viruses. *Journal of hepatology*, 28(5), 745

**P Del Porto, G Puntoriero, C Scotta, A Nicosia, E Piccolella** (2000//). High prevalence of hypervariable region 1-specific and -cross-reactive CD4(+) T cells in HCV-infected individuals responsive to IFN-alpha treatment. *Virology*, 269(2), 313

**P Dentico, A Volpe, R Buongiorno, G Fiore, M Carbone, C Manno, G Pastore, O Schiraldi** (1993//). Detection of antibodies to HCV in haemodialysis patients using two second generation ELISA tests. *The Italian journal of gastroenterology*, 25(1), 19

**P Dentico, R Sacco, A Volpe, C Ranieri, S Carabellese, M Carbone, C Casalino, R Buongiorno** (2000//). Hepatitis C virus serotypes in haemodialysis patients in South-East Italy. *Scandinavian journal of infectious diseases*, 32(2), 143

**P Ferroni, G Mascolo, M Zaninetti, D Colzani, F Pregliasco, M Pirisi, F Barbone, V Gasparini** (1993//). Identification of four epitopes in hepatitis C virus core protein. *Journal of clinical microbiology*, 31(6), 1586

**P G McIntyre, E A McCrudden, B C Dow, S O Cameron, M A McMillan, M E Allison, J D Briggs** (1994//). Hepatitis C virus infection in renal dialysis patients in Glasgow. *Nephrology, dialysis, transplantation : official publication of the European Dialysis and Transplant Association - European Renal Association*, 9(3), 291

**P G McIntyre, J Laszlo, K Appleyard, G R Ogden**

(1996//). Modified enzyme immunoassay to detect hepatitis C virus antibodies in oral fluid. *European journal of clinical microbiology & infectious diseases : official publication of the European Society of Clinical Microbiology*, 15(11), 882

**P Gupta, N Jagya, S B Pabhu, H Durgapal, S K Acharya, S K Panda** (2012//). Immunohistochemistry for the diagnosis of hepatitis E virus infection. *Journal of viral hepatitis*, 19(2), e177

**P Lamprecht, O Gutzeit, E Csernok, A Gause, G Longombardo, A L Zignego, W L Gross, C Ferri** (2003//). Prevalence of ANCA in mixed cryoglobulinemia and chronic hepatitis C virus infection. *Clinical and experimental rheumatology*, 21(6 Suppl 32), S89

**P Leal, K Stein, W Rosenberg** (1999//). What is the cost utility of screening for hepatitis C virus (HCV) in intravenous drug users?. *Journal of medical screening*, 6(3), 124

**P Leon, J A Lopez, C Elola, S R Lee, M Calmann, J M Echevarria** (1998//). Use of overlapping synthetic peptides to characterize samples from blood donors with indeterminate results to hepatitis C virus core antigen. *Vox sanguinis*, 75(1), 32

**P Liu, Z X Shi, Y C Zhang, Z C Xu, H S Shu, X Y Zhang** (1997//). A prospective study of a serum-pooling strategy in screening blood donors for antibody to hepatitis C virus. *Transfusion*, 37(7), 732

**P M Kaiguri, F A Okoth, F Lida, N Matsumura, J Tuei, E G Mathenge, A Kasomo, E Ireri, G M Kamati, V O Osidiana, N R Owino, J M Kuiundu, A W Njuguna, P M Tukei, M Yano, T Fujino, H Yatsuhashi, M Koga, R Hamada, T Fukui, M Nagatomo** (1996//). Detection of HBV-DNA and HCV-RNA viral sequences by polymerase chain reaction in selected Kenyan samples and the relationship to HBV seromarkers. *African journal of health sciences*, 3(2), 51

**P M Richalet-Secordel, F Poisson, M H Van Regenmortel** (1996//). Uses of biosensor technology in the development of probes for viral diagnosis. *Clinical and diagnostic virology*, 5(2-3), 111

**P Manzini, P L Calvo, M R Brunetto, M Baldi, M L Abate, F Oliveri, F Negro, F Balzola, G Saracco, G Verme** (1993//). Clinical significance of the antibody to the putative core protein of hepatitis C virus in patients with chronic liver disease. *Liver*, 13(4), 222

**P Marcellin, J F Colin, M Martinot-Peignoux, B N Pham, V Lefort, A B Picault, C Degott, S Erlinger, J P Benhamou** (1993//). Hepatitis C virus infection in anti-HIV positive and negative French homosexual men with chronic hepatitis: comparison of second- and third-generation anti-HCV testing. *Liver*, 13(6), 319

**P Muratori, L Muratori, F Cassani, P Terlizzi, M Lenzi, L Rodrigo, F B Bianchi** (2002//). Anti-multiple nuclear dots (anti-MND) and anti-SP100 antibodies in hepatic and rheumatological disorders. *Clinical and experimental immunology*, 127(1), 172

**P N Lelie, H T Cuypers, H W Reesink, C L van der Poel, I Winkel, E Bakker, P J van Exel-Oehlers, D Vallari, J P Allain, L Mimms** (1992//). Patterns of serological markers in transfusion-transmitted hepatitis C virus infection using second-generation HCV assays. *Journal of medical virology*, 37(3), 203

**P Parvaz, E Guichard, P Chevallier, J Ritter, C Trepo, M Sepetjan** (1994//). Hepatitis C: description of a highly sensitive method for clinical detection of viral RNA. *Journal of virological methods*, 47(1-2), 83

**P Schneeberger, H van der Nat, W van Dijk, A van Loon** (1994//). Diagnosis of hepatitis C virus infection using two second-generation enzyme immunoassays with a recombinant immunoblot assay for confirmation. *European journal of clinical microbiology & infectious diseases : official publication of the European Society of Clinical Microbiology*, 13(2), 118

**P Simmonds, J Mellor, A Craxi, J M Sanchez-Tapias, A Alberti, J Prieto, M Colombo, M G Rumi, O Lo Iacano, S Ampurdanes-Mingall, X Forns-Bernhardt, L Chemello, M P Civeira, C Frost, G Dusheiko** (1996//). Epidemiological, clinical and therapeutic associations of hepatitis C types in western European patients. *Journal of hepatology*, 24(5), 517

**P Simmonds, K A Rose, S Graham, S W Chan, F McOmish, B C Dow, E A Follett, P L Yap, H Marsden** (1993//). Mapping of serotype-specific, immunodominant epitopes in the NS-4 region of hepatitis C virus (HCV): use of type-specific peptides to serologically differentiate infections with HCV types 1, 2, and 3. *Journal of clinical microbiology*, 31(6), 1493

**P Tangkijvanich, A Janchai, N Charuruks, P Kullavanijaya, A Theamboonlers, P Hirsch, Y Poovorawan** (2000//). Clinical associations and prognostic significance of serum anti-p53 antibodies in Thai patients with hepatocellular carcinoma. *Asian Pacific journal of allergy and*

*immunology / launched by the Allergy and Immunology Society of Thailand*, 18(4), 237

**P V Holland** (1994//). Overview: diagnostic tests for viral infections transmitted by blood. *Nuclear medicine and biology*, 21(3), 407

**Paraskevi Mina, Sarah P Georgiadou, Christos Rizos, George N Dalekos, Eirini I Rigopoulou** (2010//). Prevalence of occult hepatitis B virus infection in haemodialysis patients from central Greece. *World journal of gastroenterology*, 16(2), 225

**Patrick A Ott, Beate R Berner, Bernhard A Herzog, Robert Guerkov, Nicole L Yonkers, Ivana Durinovic-Bello, Magdalena Tary-Lehmann, Paul V Lehmann, Donald D Anthony** (2004//). CD28 costimulation enhances the sensitivity of the ELISPOT assay for detection of antigen-specific memory effector CD4 and CD8 cell populations in human diseases. *Journal of immunological methods*, 285(2), 223

**Pauline Tremeaux, Sebastien Lhomme, Sabine Chapuy-Regaud, Jean-Marie Peron, Laurent Alric, Nassim Kamar, Jacques Izopet, Florence Abravanel** (2016//). Performance of an antigen assay for diagnosing acute hepatitis E virus genotype 3 infection. *Journal of clinical virology : the official publication of the Pan American Society for Clinical Virology*, 79(#issue#), 1

**Peggy Schwarz, Pavel Strnad, Guido von Figura, Alfred Janetzko, Pierre Krayenbuhl, Guido Adler, Hasan Kulaksiz** (2011//). A novel monoclonal antibody immunoassay for the detection of human serum hepcidin. *Journal of gastroenterology*, 46(5), 648

**Penelopie Koraka, Herve Zeller, Matthias Niedrig, Albert D M E Osterhaus, Jan Groen** (2002//). Reactivity of serum samples from patients with a flavivirus infection measured by immunofluorescence assay and ELISA. *Microbes and infection / Institut Pasteur*, 4(12), 1209

**Peter D Burbelo, Kathryn H Ching, Thomas L Mattson, Jason S Light, Lisa R Bishop, Joseph A Kovacs** (2007//). Rapid antibody quantification and generation of whole proteome antibody response profiles using LIPS (luciferase immunoprecipitation systems). *Biochemical and biophysical research communications*, 352(4), 889

**Philip W Tuke, Paul R Grant, James Waite, Alan D Kitchen, Roger P Eglin, Richard S Tedder** (2008//). Hepatitis C virus window-phase infections: closing the window on hepatitis C virus. *Transfusion*, 48(4), 594

**Prem H Thurairajah, Doha Hegazy, Andrew Demaine, Edward R Kaminski, Matthew E Cramp** (2011//). Loss of virus-specific T-cell responses in HCV exposed uninfected injection drug users with drug rehabilitation. *The Journal of infectious diseases*, 203(6), 847

**Pahuja S., Sharma M., Baitha B., Jain M.** (2007//). Prevalance and trends of markers of hepatitis C virus hepatitis B virus and human immunodeficiency virus in Delhi blood donors: A hospital based study *Japanese Journal of Infectious Diseases*, 60(6), 389

**Pancher M., Desire N., Ngo Y., Akhavan S., Pallier C., Poynard T., Thibault V.** (2015//). Coexistence of circulating HBsAg and anti-HBs antibodies in chronic hepatitis B carriers is not a simple analytical artifact and does not influence HBsAg quantification *Journal of clinical virology : the official publication of the Pan American Society for Clinical Virology*, 62(#issue#), 32

**Papatheodoridis G.V., Delladetsima J.K., Katsoulidou A., Sypsa V., Albrecht M., Michel G., Hatzakis A., Tassopoulos N.C.** (1997//). Significance of IgM anti-HCVcore level in chronic hepatitis C *Journal of Hepatology*, 27(1), 36

**Park Y.M., Kim I.S., Lee C.D., Kim B.S.** (1991//). Seroprevalence of antibody against hepatitis C virus (anti-HCV) in various groups of individuals in Korea *Gastroenterologia Japonica*, 26(SUPPL. 3), 159

**Parvez T., Anwar M.S.** (2002//). Diagnostic value of alpha-fetoprotein in liver cancer *Medical Forum Monthly*, 13(1), 19

**Peoc'h K., Dubel L., Saladin M., Johanet C.** (1998//). Biological evaluation of a new ELISA for the detection of anti- thyroglobulin antibodies (Autozyme(TM) TAB anti-Tg BYK France). Comparison with haemagglutination test *Immuno-Analyse et Biologie Specialisee*, 13(6), 366

**Pereira L.M., Martelli C.M., Moreira R.C., Merchan-Hamman E., Stein A.T., Cardoso M.R., Figueiredo G.M., Montarroyos U.R., Braga C., Turchi M.D., Coral G., Crespo D., Lima M.L., Alencar L.C., Costa M., dos Santos A.A., Ximenes R.A.** (2013//). Prevalence and risk factors of Hepatitis C virus infection in Brazil, 2005 through 2009: a cross-sectional study *BMC infectious diseases*, 13(#issue#), no pagination

**Perniola R., De Rinaldis C., Leo G.** (1999//). Third-generation assays for hepatitis C antibodies: a four-year study of pattern changes in patients with chronic and past infection *Panminerva medica*, 41(4), 291

**Petrik J., Pearson G.J.M., Allain J.-P.** (1997//). High throughput PCR detection of HCV based on semiautomated multisample RNA capture *Journal of Virological Methods*, 64(2), 147

**Pichardo E.M., Olsen S., Brown Jr. R.S.** (2009//). Viral hepatitis and renal failure *Current Hepatitis Reports*, 8(3), 119

**Piro L., Solinas S., Luciani M., Casale A., Bighiani T., Santonocito D., Girelli G.** (2008//). Prospective study of the meaning of indeterminate results of the recombinant immunoblot assay for hepatitis C virus in blood donors *Blood transfusion = Trasfusione del sangue*, 6(2), 107

**Ponamgi S.P.D., Chandra M., Naresh Kumar Y., Rahamathulla S., Narasu L., Habibullah C.M., Khaja M.N.** (2009//). Genotype analysis and assessment of antigenic sensitivity for recombinant HCV proteins by indigenous SIBA for detection of Hepatitis C Virus infection: A comparison with 3rd EIA and RT-PCR *Indian Journal of Biotechnology*, 8(1), 33

**Poovorawan Y., Theamboonlers A., Chumdermpadetsuk S., Thong C.P.** (1994//). Comparative results in detection of HCV antibodies by using a rapid HCV test, ELISA and immunoblot *The Southeast Asian journal of tropical medicine and public health*, 25(4), 647

**Prezzi C., Nuzzo M., Meola A., Delmastro P., Galfre G., Cortese R., Nicosia A., Monaci P.** (1996//). Selection of antigenic and immunogenic mimics of hepatitis C virus using sera from patients *Journal of Immunology*, 156(11), 4504

**Puoti M., Sandrini S., Zaltron S.** (1995//). Impact of hepatitis C virus infection on patients with chronic renal failure *Journal of Nephrology*, 8(6), 291

**Qian K.-P., Natov S.N., Pereira B.J.G., Lau J.Y.-N.** (2000//). Hepatitis C virus mixed genotype infection in patients on haemodialysis *Journal of Viral Hepatitis*, 7(2), 153

**Q Meng, C Wong, A Rangachari, S Tamatsukuri, M Sasaki, E Fiss, L Cheng, T Ramankutty, D Clarke, H Yawata, Y Sakakura, T Hirose, C Impraim** (2001//). Automated multiplex assay system for simultaneous detection of hepatitis B virus DNA, hepatitis C virus RNA, and human immunodeficiency virus type 1 RNA. *Journal of clinical microbiology*, 39(8), 2937

**Qifeng Song, Guozhen Liu, Shaohui Hu, Yan Zhang, Yong Tao, Yuning Han, Haipan Zeng, Wei Huang, Fang Li, Peng Chen, Jianhui Zhu, Chaojun**

**Hu, Shulan Zhang, Yongzhe Li, Heng Zhu, Lin Wu** (2010//). Novel autoimmune hepatitis-specific autoantigens identified using protein microarray technology. *Journal of proteome research*, 9(1), 30

**Qiu-Ju Gao, Dian-Wu Liu, Shi-Yong Zhang, Min Jia, Li-Min Wang, Li-Hong Wu, Shu-Yun Wang, Li-Xin Tong** (2009//). Polymorphisms of some cytokines and chronic hepatitis B and C virus infection. *World journal of gastroenterology*, 15(44), 5610

**Quan-Cheng Kan, Zu-Jiang Yu, Yan-Chang Lei, Lian-Jie Hao, Dong-Liang Yang** (2003//). Lethiferous effects of a recombinant vector carrying thymidine kinase suicide gene on 2.2.15 cells via a self-modulating mechanism. *World journal of gastroenterology*, 9(10), 2216

**Quan-Chu Wang, Zhi-Hua Feng, Yong-Xing Zhou, Qing-He Nie** (2005//). Induction of hepatitis C virus-specific cytotoxic T and B cell responses by dendritic cells expressing a modified antigen targeting receptor. *World journal of gastroenterology*, 11(4), 557

**R A Sinico, M L Ribero, A Fornasieri, P Renoldi, J Zhou, M Fasola, G Portera, G Arrigo, A Gibelli, G D'Amico** (1995//). Hepatitis C virus genotype in patients with essential mixed cryoglobulinaemia. *QJM : monthly journal of the Association of Physicians*, 88(11), 805

**R Cable, S Badon, C Pray, M A Popovsky** (1997//). Limited utility of alanine aminotransferase screening of hepatitis C antibody-screened blood donors. *Transfusion*, 37(2), 206

**R D Aach, C E Stevens, F B Hollinger, J W Mosley, D A Peterson, P E Taylor, R G Johnson, L H Barbosa, G J Nemo** (1991//). Hepatitis C virus infection in post-transfusion hepatitis. An analysis with first- and second-generation assays. *The New England journal of medicine*, 325(19), 1325

**R Firdaus, K Saha, P C Sadhukhan** (2013//). Rapid immunoassay alone is insufficient for the detection of hepatitis C virus infection among high-risk population. *Journal of viral hepatitis*, 20(4), 290

**R Heimer, K Khoshnood, B Jariwala-Freeman, B Duncan, Y Harima** (1996//). Hepatitis in used syringes: the limits of sensitivity of techniques to detect hepatitis B virus (HBV) DNA, hepatitis C virus (HCV) RNA, and antibodies to HBV core and HCV antigens. *The Journal of infectious diseases*, 173(4), 997

**R Koike, T Iizuka, T Watanabe, N Miyasaka** (2001//). The GOR gene product cannot cross-



react with hepatitis C virus in humans. *Clinical and experimental immunology*, 124(3), 429

**R Lesniewski, G Okasinski, R Carrick, C Van Sant, S Desai, R Johnson, J Scheffel, B Moore, I Mushahwar** (1995//). Antibody to hepatitis C virus second envelope (HCV-E2) glycoprotein: a new marker of HCV infection closely associated with viremia. *Journal of medical virology*, 45(4), 415

**R Nagayama, F Tsuda, H Okamoto, Y Wang, T Mitsui, T Tanaka, Y Miyakawa, M Mayumi** (1993//). Genotype dependence of hepatitis C virus antibodies detectable by the first-generation enzyme-linked immunosorbent assay with C100-3 protein. *The Journal of clinical investigation*, 92(3), 1529

**R Panigrahi, S Majumder, M Gooptu, A Biswas, S Datta, P K Chandra, A Banerjee, S Chakrabarti, D Bandopadhyay, B K De, R Chakravarty** (2012//). Occult HBV infection among anti-HBc positive HIV-infected patients in apex referral centre, Eastern India. *Annals of hepatology*, 11(6), 870

**R R Lesniewski, K M Boardway, J M Casey, S M Desai, S G Devare, T K Leung, I K Mushahwar** (1993//). Hypervariable 5'-terminus of hepatitis C virus E2/NS1 encodes antigenically distinct variants. *Journal of medical virology*, 40(2), 150

**R S Ross, S O Viazov, S Hoffmann, M Roggendorf** (2001//). Performance characteristics of a transcription-mediated nucleic acid amplification assay for qualitative detection of hepatitis C virus RNA. *Journal of clinical laboratory analysis*, 15(6), 308

**R S Ross, S Viazov, S Salloum, P Hilgard, G Gerken, M Roggendorf** (2010//). Analytical performance characteristics and clinical utility of a novel assay for total hepatitis C virus core antigen quantification. *Journal of clinical microbiology*, 48(4), 1161

**R S Tedder, P Tuke, N Wallis, M Wright, L Nicholson, P R Grant** (2013//). Therapy-induced clearance of HCV core antigen from plasma predicts an end of treatment viral response. *Journal of viral hepatitis*, 20(1), 65

**R Simo, C Hernandez, J Genesca, R Jordi, J Mesa** (1996//). High prevalence of hepatitis C virus infection in diabetic patients. *Diabetes care*, 19(9), 998

**R Stefan Ross, Oumaima Stambouli, Nico Gruner, Ulrich Marcus, Wei Cai, Weidong Zhang, Ruth Zimmermann, Michael Roggendorf** (2013//). Detection of infections with hepatitis B virus, hepatitis C virus, and human

immunodeficiency virus by analyses of dried blood spots--performance characteristics of the ARCHITECT system and two commercial assays for nucleic acid amplification. *Virology journal*, 10(#issue#), 72

**R Tuveri, C Rothschild, S Pol, D Reijasse, T Persico, C Gazengel, C Brechot, V Thiers** (1997//). Hepatitis C virus genotypes in French haemophiliacs: kinetics and reappraisal of mixed infections. *Journal of medical virology*, 51(1), 36

**R U Khan, C Y Tong, S Bloom, I T Gilmore, C H Toh, P H Bolton-Maggs, N J Beeching, C A Hart** (1997//). Evaluation of two simplified methods for genotyping hepatitis C virus. *Journal of medical virology*, 52(1), 35

**Rafael Antonio Marin y Lopez, Sagrario Romero-Estrella, Lilia Infante-Ramirez, Jorge Saul Mendez-Aquino, Patricia Berron-Ruiz, Norma Angelica Morales-Alfaro, Raul Vivar, Etelvina Carrada, Maria del Refugio Rivera-Rendon, Sergio Arturo Sanchez-Guerrero** (2004//). Hepatitis C seroprevalence in accepted versus deferred blood-donor candidates evaluated by medical history and self-exclusion form. *Transfusion*, 44(9), 1344

**Raj Nath Makroo, Mohit Chowdhry, Aakanksha Bhatia, Minimol Antony** (2015//). Evaluation of the Procleix Ultrio Plus ID NAT assay for detection of HIV 1, HBV and HCV in blood donors. *Asian journal of transfusion science*, 9(1), 29

**Rajesh Kumar, Sonia Gupta, Amarjit Kaur, Manvi Gupta** (2015//). Individual donor-nucleic acid testing for human immunodeficiency virus-1, hepatitis C virus and hepatitis B virus and its role in blood safety. *Asian journal of transfusion science*, 9(2), 199

**Rajesh N Gacche, Sadiq K Al-Mohani** (2012//). Seroprevalence and Risk Factors for Hepatitis C Virus Infection among General Population in Central Region of Yemen. *Hepatitis research and treatment*, 2012(#issue#), 689726

**Rajiv G Tawar, Che C Colpitts, Jorg Timm, Tanja Fehm, Michael Roggendorf, Helga Meisel, Nicolas Meyer, Francois Habersetzer, Francois-Loic Cosset, Thomas Berg, Mirjam B Zeisel, Thomas F Baumert** (2015//). Acute hepatitis C virus infection induces anti-host cell receptor antibodies with virus-neutralizing properties. *Hepatology (Baltimore, Md.)*, 62(3), 726

**Rhoda Ashley Morrow, David Friedrich, Amalia Meier, Lawrence Corey** (2005//). Use of "biokit HSV-2 Rapid Assay" to improve the positive predictive value of Focus HerpeSelect HSV-2 ELISA.

**Richard Njouom, Mathurin Cyrille Tejiokem, Marie Claire Endegue Zanga, Regis Pouillot, Ahidjo Ayouba, Christophe Pasquier, Eric Nerrienet** (2006//). A cost-effective algorithm for the diagnosis of Hepatitis C virus infection and prediction of HCV viremia in Cameroon. *Journal of virological methods*, 133(2), 223

**Roger Chou, Elizabeth C Clark, Mark Helfand, U.S. Preventive Services Task Force** (2004//). Screening for hepatitis C virus infection: a review of the evidence for the U.S. Preventive Services Task Force. *Annals of internal medicine*, 140(6), 465

**Rong-Li Piao, David R Brigstock, Jie Zhu, Man-Li Zhang, Run-Ping Gao** (2012//). Clinical significance of connective tissue growth factor in hepatitis B virus-induced hepatic fibrosis. *World journal of gastroenterology*, 18(18), 2280

**Rong-Yuan Huang, Hao-Teng Chang, Chung-Yu Lan, Tun-Wen Pai, Chao-Nan Wu, Chung-Mei Ling, Margaret Dah-Tsyng Chang** (2008//). Development and evaluation of a sensitive enzyme-linked oligonucleotide-sorbent assay for detection of polymerase chain reaction-amplified hepatitis C virus of genotypes 1-6. *Journal of virological methods*, 151(2), 211

**Rongzhen Xu, Xiaoxian Gan, Yongming Fang, Shu Zheng, Qi Dong** (2007//). A simple, rapid, and sensitive integrated protein microarray for simultaneous detection of multiple antigens and antibodies of five human hepatitis viruses (HBV, HCV, HDV, HEV, and HGV). *Analytical biochemistry*, 362(1), 69

**Rosa Divella, Antonio Mazzocca, Cosimo Gadaleta, Giovanni Simone, Angelo Paradiso, Michele Quaranta, Antonella Daniele** (2012//). Influence of plasminogen activator inhibitor-1 (SERPINE1) 4G/5G polymorphism on circulating SERPINE-1 antigen expression in HCC associated with viral infection. *Cancer genomics & proteomics*, 9(4), 193

**Rushna Firdaus, Kallol Saha, Aritra Biswas, Provash Chandra Sadhukhan** (2015//). Current molecular methods for the detection of hepatitis C virus in high risk group population: A systematic review. *World journal of virology*, 4(1), 25

**Radzimski C., Probst C., Teegen B., Rentzsch K., Blocker I.M., Dahnrich C., Schlumberger W., Stocker W., Bogdanos D.P., Komorowski L.** (2013//). Development of a recombinant cell-based indirect immunofluorescence assay for the determination of autoantibodies against soluble

liver antigen in autoimmune hepatitis *Clinical & developmental immunology*, 2013(#issue#), 572815

**Rahman M.U., Khan S.A., Lodhi Y.** (2008//). Unconfirmed reactive screening tests and their impact on donor management *Pakistan Journal of Medical Sciences*, 24(4), 517

**Ramadan R.A., Madkour M.A., El-Nagarr M.M., Abourawash S.N.** (2014//). Serum clusterin as a marker for diagnosing hepatocellular carcinoma *Alexandria Journal of Medicine*, 50(3), 227

**Ratcliff R.M., Chang G., Kok T., Sloots T.P.** (2007//). Molecular diagnosis of medical viruses *Current Issues in Molecular Biology*, 9(2), 87

**Ravera G., Colombi T., Rosso E., Franceschini M.** (1994//). Comparison between two methods for recognition and characterization of anti-HCV (hepatitis C virus) antibodies *Journal of Preventive Medicine and Hygiene*, 35(3-4), 101

**Ray S., Reddy P.J., Choudhary S., Raghu D., Srivastava S.** (2011//). Emerging nanoproteomics approaches for disease biomarker detection: A current perspective *Journal of Proteomics*, 74(12), 2660

**Reesink H.W., van der Poel C.L., Bresters D., Cuypers H.T., Zaaijer H., Lelie P.N.** (1993//). Testing for HCV markers *Developments in biological standardization*, 81(#issue#), 77

**Regev A., Schiff E.R.** (2000//). Viral hepatitis A, B, and C *Clinics in Liver Disease*, 4(1), 47

**Rioche M., Dubreuil P., Kouassi-Samgare A., Akran V., Nordmann P., Pillot J.** (1997//). Frequency of sporadic viral hepatitis E in Cote d'Ivoire based on still questionable serology *Bulletin of the World Health Organization*, 75(4), 349

**Rizvi M., Azam M., Ajmal M.R., Shukla I., Malik A.** (2011//). Prevalence of leptospira in acute hepatitis syndrome and assessment of IL-8 and TNF-alpha level in leptospiral hepatitis *Annals of Tropical Medicine and Parasitology*, 105(7), 499

**Rodriguez-Medina J.R., Carrasquillo E.A., Sarriera J.E., Medina R., Oharriz J.J., Rubio C.E.** (1993//). Hepatitis C viral RNA amplification by the polymerase chain reaction allows detection of false positive HCV ELISAs among patients with non-A, non-B hepatitis *Puerto Rico health sciences journal*, 12(1), 35

**Roth W.K., Seifried E.** (2002//). The German

experience with NAT *Transfusion Medicine*, 12(4), 255

**Rotily M.,Loubiere S.,Nixon J.,Bourliere M.,Halfon P.,Moatti J.P.** (1997//). Should hepatitis C be screened? Socioeconomic analysis of different screening strategies for chronic hepatitis C in French population *Gastroenterologie clinique et biologique*, 21(1 Pt 2), S33

**Rotily M.,Roze S.** (2013//). What is the impact of disease prevalence upon health technology assessment? *Best Practice and Research: Clinical Gastroenterology*, 27(6), 853

**Rowan B.P.,Smith A.,Gleeson D.,Hunt L.P.,Warnes T.W.** (1994//). Hepatitis C virus in autoimmune liver disease in the UK: Aetiological agent or artefact? *Gut*, 35(4), 542

**Ruggieri A.,Harada T.,Matsuura Y.,Miyamura T.** (1997//). Sensitization to Fas-mediated apoptosis by hepatitis C virus core protein *Virology*, 229(1), 68

**Ryff J.-C.** (1997//). Clinical investigation of the immunogenicity of interferon-alpha2a *Journal of Interferon and Cytokine Research*, 17(SUPPL. 1), S29

**Saad Y.,El-Serafy M.,Eldin M.S.,Abdellatif Z.,Khatab H.,Elbaz T.,Elgarem H.** (2013//). New genetic markers for diagnosis of hepatitis C related hepatocellular carcinoma in Egyptian patients *Journal of Gastrointestinal and Liver Diseases*, 22(4), 419

**Sabet L.P.,Taheri T.,Memarnejadian A.,Azad T.M.,Asgari F.,Rahimnia R.,Alavian S.M.,Rafati S.,Rad K.S.** (2014//). Immunogenicity of multi-epitope DNA and peptide vaccine candidates based on core, E2, NS3 and NS5B HCV epitopes in BALB/c mice #journal#, 14(10), no pagination

**Sabry A.,El-Agroudy A.,Sheashaa H.,El-husseini A.,Taha N.M.,Elbaz M.,El-Shahat F.,Sobh M.** (2005//). Histological characterization of HCV-associated glomerulopathy in Egyptian patients *International Urology and Nephrology*, 37(2), 355

**Sakudo A.,Onodera T.** (2012//). Virus capture using anionic polymer-coated magnetic beads (Review) *International Journal of Molecular Medicine*, 30(1), 3

**Sanmarco M.,Soler C.,Christides C.,Raoult D.,Weiller P.J.,Gerolami V.,Bernard D.** (1997//). Prevalence and clinical significance of igit isotype anti-beta2-glycoprotein I antibodies in antiphospholipid syndrome: A comparative study with anticardiolipin antibodies *Journal of Laboratory and Clinical Medicine*, 129(5), 499

**Sansonno D.,Dammacco F.** (1992//). A method for detecting specific anti-C100 protein antibodies of IgM isotype in hepatitis C virus infection *International journal of clinical & laboratory research*, 22(1), 40

**Sansonno D.,Iacobelli A.R.,Cornacchiulo V.,Lauletta G.,Distasi M.A.,Gatti P.,Dammacco F.** (1996//). Immunochemical and biomolecular studies of circulating immune complexes isolated from patients with acute and chronic hepatitis C virus infection *European Journal of Clinical Investigation*, 26(6), 465

**Sazama K.** (1995//). Existing problems in the testing for infectious diseases *Immunological Investigations*, 24(1-2), 131

**Schennach H.,Meyersbach P.,Schonitzer D.,Fuchs D.** (2000//). Additional neopterin screening to improve safety of blood donations *Pteridines*, 11(3), 76

**Schirren C.A.,Jung M.-C.,Gerlach J.T.,Worzfeld T.,Baretton G.,Mamin M.,Hubert Gruener N.,Houghton M.,Pape G.R.** (2000//). Liver-derived hepatitis C virus (HCV)-specific CD4+ T cells recognize multiple HCV epitopes and produce interferon gamma *Hepatology*, 32(3), 597

**Schmeding M.,Kienlein S.,Rocken C.,Neuhaus R.,Neuhaus P.,Heidenhain C.,Neumann U.P.** (2010//). ELISA-based detection of C4d after liver transplantation - A helpful tool for differential diagnosis between acute rejection and HCV-recurrence? *Transplant Immunology*, 23(4), 156

**Schmilovitz-Weiss H.,Levy M.,Thompson N.,Dusheiko G.** (1993//). Viral markers in the treatment of hepatitis B and C *Gut*, 34(SUPPL. 2), S26

**Scognamiglio P.,Accapezzato D.,Casciaro M.A.,Cacciani A.,Artini M.,Bruno G.,Chircu M.L.,Sidney J.,Southwood S.,Abrignani S.,Sette A.,Barnaba V.** (1999//). Presence of effector CD8+ T cells in hepatitis C virus-exposed healthy seronegative donors *Journal of Immunology*, 162(11), 6681

**Seeff L.B.** (1997//). Natural history of hepatitis C *Hepatology*, 26(3 SUPPL.), 21S

**Sekiguchi T.,Umemura T.,Fujimori N.,Shibata S.,Ichikawa Y.,Kimura T.,Joshita S.,Komatsu M.,Matsumoto A.,Tanaka E.,Ota M.** (2015//). Serum cell death biomarkers for prediction of liver fibrosis and poor prognosis in primary biliary cirrhosis *PLoS ONE*, 10(6), no pagination

- Seremba E.,Ocama P.,Opio C.K.,Kagimu M.,Thomas D.L.,Yuan H.J.,Attar N.,Lee W.M.** (2010//). Poor performance of hepatitis C antibody tests in hospital patients in Uganda *Journal of medical virology*, 82(8), 1371
- Serfaty L.,Nousbaum J.B.,Elghouzzi M.H.,Giral P.,Legendre C.,Poupon R.** (1995//). Prevalence, severity, and risk factors of liver disease in blood donors positive in a second-generation anti-hepatitis C virus screening test *Hepatology*, 21(3), 725
- Setoguchi Y.,Yamamoto K.,Ozaki I.,Wada I.,Hara T.,Fujio N.,Mizuta T.,Sakai T.,Nagumo F.,Tadano J.** (1992//). Overlap and discrepancy between tests for anti-C100, anti-GOR and anti-CP9 in patients with chronic liver disease and inhabitants in Saga, Japan *Gastroenterologia Japonica*, 27(4), 502
- Shah H.A.,Heathcote J.,Feld J.J.** (2013//). A Canadian screening program for hepatitis C: Is now the time? *CMAJ*, 185(15), 1325
- Shameem Banu A.S.,Latha P.,Kaveri K.,Jayakumar S.** (2011//). Serum neopterin estimation as an indicator for safe blood transfusion *Journal of Clinical and Diagnostic Research*, 5(8), 1555
- Sharma B.,Srinivasan R.,Chawla Y.K.,Kapil S.,Saini N.,Singla B.,Chakraborty A.,Kalra N.,Duseja A.,Dhiman R.K.** (2010//). Clinical utility of prothrombin induced by vitamin K absence in the detection of hepatocellular carcinoma in Indian population *Hepatology International*, 4(3), 569
- Sharvadze L.,Nelson K.E.,Imnadze P.,Karchava M.,Tsertsvadze T.** (2008//). Prevalence of HCV and genotypes distribution in general population of Georgia *Georgian medical news*, #volume#(165), 71
- Sherman M.** (2011//). Hepatocellular Carcinoma: Screening and Staging *Clinics in Liver Disease*, 15(2), 323
- Shivkumar S.,Peeling R.,Jafari Y.,Joseph L.,Pai N.P.** (2012//). Accuracy of rapid and point-of-care screening tests for hepatitis C: A systematic review and meta-analysis *Annals of Internal Medicine*, 157(8), 558
- Shopnick R.I.,Bolivar E.,Brettler D.B.** (1996//). Hepatitis C seropositivity in HIV-negative children with severe haemophilia *Haemophilia*, 2(2), 100
- Shrestha A.C.,Ghimre P.,Tiwari B.R.,Rajkarnikar M.** (2009//). Transfusion-transmissible infections among blood donors in Kathmandu, Nepal *Journal of Infection in Developing Countries*, 3(10), 794
- Silva L.D.,Rocha A.M.C.,Rocha G.A.,de Moura S.B.,Rocha M.M.N.P.,Dani R.,de Melo F.F.,Guerra J.B.,de Castro L.P.F.,Mendes G.S.,de Abreu Ferrari T.C.,Lima A.S.,Queiroz D.M.M.** (2011//). The presence of *Helicobacter pylori* in the liver depends on the Th1, Th17 and Treg cytokine profile of the patient *Memorias do Instituto Oswaldo Cruz*, 106(6), 748
- Simavli S.,Ozlu T.,Kucukbayrak B.** (2014//). Age specific prevalence of hepatitis B and hepatitis C among pregnant women in the northwestern region of Turkey *Indian Journal of Gastroenterology*, 33(3), 293
- Simon N.** (1995//). Hepatitis C virus infection in hemodialysis *Pathologie-biologie*, 43(8), 735
- Sinniah M.,Ooi B.G.** (1993//). Hepatitis C--the Malaysian story *Singapore medical journal*, 34(2), 132
- Snijdewind I.J.M.,Van Kampen J.J.A.,Fraaij P.L.A.,Van der Ende M.E.,Osterhaus A.D.M.E.,Gruters R.A.** (2012//). Current and future applications of dried blood spots in viral disease management *Antiviral Research*, 93(3), 309
- Soares A.,Cunha R.,Rodrigues F.,Ribeiro H.** (2009//). Smooth muscle autoantibodies with F-actin specificity *Autoimmunity Reviews*, 8(8), 713
- Solgi G.,Ghannad M.S.,Khalilian A.,Majlesi A.,Hajiloo M.** (2015//). Molecular epidemiology of hepatitis C virus and its relation with persistence or clearance of infection in Hamadan, West-Iran *Iranian Journal of Microbiology*, 7(2), 109
- Soliman H.H.,Nagy H.,Kotb N.,Alm El-Din M.A.** (2012//). The role of chemokine CC ligand 20 in patients with liver cirrhosis and hepatocellular carcinoma *International Journal of Biological Markers*, 27(2), 125
- Sookoian S.,Castano G.** (2002//). Evaluation of a third generation anti-HCV assay in predicting viremia in patients with positive HCV antibodies *Annals of hepatology : official journal of the Mexican Association of Hepatology*, 1(4), 179
- Souto F.J.,Fontes C.J.,Martelli C.M.,Turchi M.D.,Martins R.M.,Andrade A.L.** (1999//). Hepatitis C virus prevalence among an immigrant community to the southern Amazon, Brazil *Memorias do Instituto Oswaldo Cruz*, 94(6), 719
- Stevenson D.L.,Harris A.G.,Neal K.R.,Irving W.L.** (1996//). The presence of rheumatoid factor in sera from anti-HCV positive blood donors interferes with the detection of HCV-specific IgM *Journal of Hepatology*, 25(5), 621

**Stezinar Levicnik S.,Rahne Potokar U.** (2012//). Blood donors screening for infection markers in Slovenia in the period 1991-2010 *Zdravniski Vestnik*, 81(SUPPL.2), 257

**Stinton L.M.,Bentow C.,Mahler M.,Norman G.L.,Eksteen B.,Mason A.L.,Kaplan G.G.,Lindkvist B.,Hirschfield G.M.,Milkiewicz P.,Cheung A.,Janssen H.L.,Fritzler M.J.** (2014//). PR3-ANCA: a promising biomarker in primary sclerosing cholangitis (PSC) *PloS one*, 9(11), e112877

**Stramer S.L.,Krysztof D.E.,Brodsky J.P.,Fickett T.A.,Reynolds B.,Dodd R.Y.,Kleinman S.H.** (2013//). Comparative analysis of triplex nucleic acid test assays in United States blood donors *Transfusion*, 53(10 PART 2), 2525

**Sue M.J.,Yeap S.K.,Omar A.R.,Tan S.W.** (2014//). Application of PCR-ELISA in molecular diagnosis *BioMed Research International*, 2014(#issue#), no pagination

**Sutti S.,Vidali M.,Mombello C.,Sartori M.,Albano E.** (2010//). Conformational anti-cytochrome P4502E1 (CYP2E1) auto-antibodies contribute to necro-inflammatory injury in chronic hepatitis C *Journal of Viral Hepatitis*, 17(10), 685

**Sutton A.J.,Edmunds W.J.,Sweeting M.J.,Gill O.N.** (2008)  
**S Diaz, P Liu, W L Kuhnert, M Healy, A M Prince, M M El-Nageh** (2008//). Development of the International Consortium for Blood Safety (ICBS) HCV panels. *Eastern Mediterranean health journal = La revue de sante de la Mediterranee orientale = al-Majallah al-s.ih.hiyah li-sharq al-mutawassit.*, 14(2), 427

**S Dourakis, J Brown, U Kumar, P Karayiannis, P Kernoff, J Chiba, H Ohba, T Miyamura, I Saito, J Monjardino** (1992//). Serological response and detection of viraemia in acute hepatitis C virus infection. *Journal of hepatology*, 14(2-3), 370

**S E Bassett, D L Thomas, K M Brasky, R E Lanford** (1999//). Viral persistence, antibody to E1 and E2, and hypervariable region 1 sequence stability in hepatitis C virus-inoculated chimpanzees. *Journal of virology*, 73(2), 1118

**S Erensoy** (2001//). Diagnosis of hepatitis C virus (HCV) infection and laboratory monitoring of its therapy. *Journal of clinical virology : the official publication of the Pan American Society for Clinical Virology*, 21(3), 271

**S Garcovich, A Ruggeri, M D'Agostino, F Ardito, C De Simone, G Delogu, G Fadda** (2012//). Clinical applicability of Quantiferon-TB-Gold testing in

psoriasis patients during long-term anti-TNF-alpha treatment: a prospective, observational study. *Journal of the European Academy of Dermatology and Venereology : JEADV*, 26(12), 1572

**S Gharagozloo, J Khoshnoodi, F Shokri** (2001//). Hepatitis C virus infection in patients with essential mixed cryoglobulinemia, multiple myeloma and chronic lymphocytic leukemia. *Pathology oncology research : POR*, 7(2), 135

**S H Caldwell, X Li, R M Rourk, A Millar, K M Sosnowski, M Sue, A S Barritt, R W McCallum, E R Schiff** (1993//). Hepatitis C infection by polymerase chain reaction in alcoholics: false-positive ELISA results and the influence of infection on a clinical prognostic score. *The American journal of gastroenterology*, 88(7), 1016

**S Horiuchi, W Ampofo, Y Koyanagi, A Yamashita, M Waki, A Matsumoto, M Yamamoto, N Yamamoto** (1998//). High-level production of alternatively spliced soluble interleukin-6 receptor in serum of patients with adult T-cell leukaemia/HTLV-I-associated myelopathy. *Immunology*, 95(3), 360

**S I Strasser, B C Smith, K J Watson, P J Coghlan, S A Locarnini, P V Desmond** (1995//). Evaluation of blood donors with equivocal hepatitis C serological results. *The Medical journal of Australia*, 162(9), 459

**S Katiyar, B C Dash, V Thakur, R C Gupta, S K Sarin, B C Das** (2000//). P53 tumor suppressor gene mutations in hepatocellular carcinoma patients in India. *Cancer*, 88(7), 1565

**S Kawano, M Tanaka, S Fujiyama, S Sato, Y Taura, M Goto, H Chikazawa, T Sato** (1994//). Clinical usefulness of an assay for hepatitis C virus core in the diagnosis of non-A, non-B hepatitis and monitoring of the response to interferon therapy. *Journal of gastroenterology and hepatology*, 9(3), 217

**S Kawano, S Fujiyama, S Sato, K Yoshida, J Shibata, H Murata, T Kawahara, K Mizuno, S Nonaka, T Sato** (1991//). Detection of antibodies to hepatitis C virus (anti-HCV) in patients with various liver diseases, by an ELISA (KCL-163) test consisting of synthetic peptides corresponding to an HCV genome. *Gastroenterologia Japonica*, 26 Suppl 3(#issue#), 218

**S Kawano, S Fujiyama, S Sato, M Tanaka, M Goto, Y Taura, T Sato, T Kawahara, K Mizuno, S Nonaka** (1992//). Clinical evaluation of three anti-HCV ELISAs in patients with various liver diseases. *Digestive diseases and sciences*, 37(8), 1268

- S Kumar, R K Ratho, Y K Chawla, A Chakraborti** (2006//). Virological investigation of a hepatitis E epidemic in North India. *Singapore medical journal*, 47(9), 769
- S Lou, X Qiu, G Tegtmeier, S Leitz, J Brackett, K Cousineau, A Varma, H Seballos, S Kundu, S Kuemmerle, J C Hunt** (1997//). Immunoassays to study prevalence of antibody against GB virus C in blood donors. *Journal of virological methods*, 68(1), 45
- S M Cooper, G Kirtschig, K J M Jeffery, F Wojnarowska** (2004//). No association between hepatitis B or C viruses and vulval lichen planus in a UK population. *BJOG : an international journal of obstetrics and gynaecology*, 111(3), 271
- S Magrin, A Craxi, C Fabiano, G Fiorentino, L Marino, P Almasio, G B Pinzello, U Palazzo, M Vitale, A Maggio** (1992//). Serum hepatitis C virus (HCV)-RNA and response to alpha-interferon in anti-HCV positive chronic hepatitis. *Journal of medical virology*, 38(3), 200
- S Mishiro, Y Hoshi, K Takeda, A Yoshikawa, T Gotanda, K Takahashi, Y Akahane, H Yoshizawa, H Okamoto, F Tsuda** (1990//). Non-A, non-B hepatitis specific antibodies directed at host-derived epitope: implication for an autoimmune process. *Lancet (London, England)*, 336(8728), 1400
- S N Natov, J Y Lau, B A Bouthot, B V Murthy, R Ruthazer, C H Schmid, A S Levey, B J Pereira** (1998//). Serologic and virologic profiles of hepatitis C infection in renal transplant candidates. New England Organ Bank Hepatitis C Study Group. *American journal of kidney diseases : the official journal of the National Kidney Foundation*, 31(6), 920
- S Nagata, H Ishii, H Yokoyama, S Kato, S Moriya, K Maruyama, H Takahashi, M Tsuchiya** (1993//). Influence of HCV infection and its subtypes on clinical course of alcoholic liver disease. *Gastroenterologia Japonica*, 28 Suppl 5(#issue#), 91
- S Nedjar, R M Biswas, I K Hewlett** (1991//). Co-amplification of specific sequences of HCV and HIV-1 genomes by using the polymerase chain reaction assay: a potential tool for the simultaneous detection of HCV and HIV-1. *Journal of virological methods*, 35(3), 297
- S Nicholson, D E Leslie, T Efanidis, C K Fairley, I D Gust** (1991//). Hepatitis C antibody testing: problems associated with non-specific binding. *Journal of virological methods*, 33(3), 311
- S Nishiguchi, T Kuroki, T Ueda, K Fukuda, T Takeda, S Nakajima, S Shiomi, K Kobayashi, S Otani, N Hayashi** (1992//). Detection of hepatitis C virus antibody in the absence of viral RNA in patients with autoimmune hepatitis. *Annals of internal medicine*, 116(1), 21
- S O Cameron, K S Wilson, T Good, J McMenamin, B McCarron, A Pithie, R Fox** (1999//). Detection of antibodies against hepatitis C virus in saliva: a marker of viral replication. *Journal of viral hepatitis*, 6(2), 141
- S P D Ponamgi, S Rahamathulla, Y N Kumar, M Chandra, N Lakshmi, C M Habibullah, M N Khaja** (2009//). Prevalence of hepatitis C virus (HCV) coinfection in HIV infected individuals in south India and characterization of HCV genotypes. *Indian journal of medical microbiology*, 27(1), 12
- S P Parker, W D Cubitt, A E Ades** (1997//). A method for the detection and confirmation of antibodies to hepatitis C virus in dried blood spots. *Journal of virological methods*, 68(2), 199
- S Pol, V Thiers, F Driss, A Devergie, P Berthelot, C Brechot, E Gluckman** (1993//). Lack of evidence for a role of HCV in hepatitis-associated aplastic anaemia. *British journal of haematology*, 85(4), 808
- S Pol, V Thiers, J B Nausbaum, C Legendre, P Berthelot, H Kreis, C Brechot** (1995//). The changing relative prevalence of hepatitis C virus genotypes: evidence in hemodialyzed patients and kidney recipients. *Gastroenterology*, 108(2), 581
- S Polywka, R Laufs** (1991//). Hepatitis C virus antibodies among different groups at risk and patients with suspected non-A, non-B hepatitis. *Infection*, 19(2), 81
- S R Lee, G D Yearwood, G B Guillon, L A Kurtz, M Fischl, T Friel, C A Berne, K W Kardos** (2010//). Evaluation of a rapid, point-of-care test device for the diagnosis of hepatitis C infection. *Journal of clinical virology : the official publication of the Pan American Society for Clinical Virology*, 48(1), 15
- S Ramalingam, P G Babu, G Chandy, G Kurien, P Thomas, G Sridharan** (1998//). Importance of RT-PCR for detection of hepatitis C virus among different patient groups. *The Indian journal of medical research*, 108(#issue#), 85
- S Ramia** (1995//). Hepatitis C virus: molecular virology and its implications for serologic diagnosis. *Saudi journal of kidney diseases and transplantation : an official publication of the Saudi Center for Organ Transplantation, Saudi Arabia*, 6(2), 190

- S Ramia, F Ramlawi, M Kanaan, S Klayme, R Naman** (2005//). Frequency and significance of antibodies against hepatitis B core (anti-HBc) antigen as the only serological marker for hepatitis B infection in Lebanese blood donors. *Epidemiology and infection*, 133(4), 695
- S S Bernvil, V J Andrews, A A Kariem** (1991//). Hepatitis C antibody prevalence in Saudi Arabian blood donor population. *Annals of Saudi medicine*, 11(5), 563
- S S Bernvil, V J Andrews, F Sasich** (1994//). Second-generation anti-HCV screening in a Saudi Arabian donor population. *Vox sanguinis*, 66(1), 33
- S Saab, M Brezina, G Gitnick, P Martin, H F Jr Yee** (2001//). Hepatitis C screening strategies in hemodialysis patients. *American journal of kidney diseases : the official journal of the National Kidney Foundation*, 38(1), 91
- S Saitoh, K Ikeda, I Koida, A Tsubota, Y Arase, K Chayama, H Kumada** (1994//). Serum des-gamma-carboxyprothrombin concentration determined by the avidin-biotin complex method in small hepatocellular carcinomas. *Cancer*, 74(11), 2918
- S Saraswat, K Banerjee, N Chaudhury, T Mahant, P Khandekar, R K Gupta, S Naik** (1996//). Post-transfusion hepatitis type B following multiple transfusions of HBsAg-negative blood. *Journal of hepatology*, 25(5), 639
- S Sato, S Fujiyama, M Tanaka, K Yamasaki, I Kuramoto, S Kawano, T Sato, K Mizuno, S Nonaka** (1994//). Coinfection of hepatitis C virus in patients with chronic hepatitis B infection. *Journal of hepatology*, 21(2), 159
- S Sato, S Fujiyama, S Kawano, T Sato, K Mizuno, S Nonaka** (1991//). Evaluation of the KCL-163 ELISA test for detecting antibodies against hepatitis C virus in patients with non-A, non-B chronic hepatitis. *Gastroenterologia Japonica*, 26 Suppl 3(#issue#), 216
- S Slavenburg, F M Verduyn-Lunel, J T Hermesen, W J G Melchers, R H M te Morsche, J P H Drenth** (2008//). Prevalence of hepatitis C in the general population in the Netherlands. *The Netherlands journal of medicine*, 66(1), 13
- S Songsivilai, T Dharakul, D Kanistanon** (1996//). Hepatitis C virus genotypes in patients with hepatocellular carcinoma and cholangiocarcinoma in Thailand. *Transactions of the Royal Society of Tropical Medicine and Hygiene*, 90(5), 505
- S Tisminetzky, M Gerotto, P Pontisso, L Chemello, L E Prescott, K A Rose, F Baralle, P Simmonds, A Alberti** (1995//). Comparison of genotyping and serotyping methods for the identification of hepatitis C virus types. *Journal of virological methods*, 55(3), 303
- S U Mehta, S Mishiro, K Sekiguchi, T Leung, G J Dawson, L M Pendy, D A Peterson, S G Devare** (1992//). Immune response to GOR, a marker for non-A, non-B hepatitis and its correlation with hepatitis C virus infection. *Journal of clinical immunology*, 12(3), 178
- S Viazov, A Zibert, K Ramakrishnan, A Widell, A Cavicchini, E Schreier, M Roggendorf** (1994//). Typing of hepatitis C virus isolates by DNA enzyme immunoassay. *Journal of virological methods*, 48(1), 81
- S W Chan, J M Bye, P Jackson, J P Allain** (1996//). Human recombinant antibodies specific for hepatitis C virus core and envelope E2 peptides from an immune phage display library. *The Journal of general virology*, 77 ( Pt 10)(#issue#), 2531
- Sabahattin Ocak, Hasan Kaya, Meryem Cetin, Edip Gali, Muge Ozturk** (2006//). Seroprevalence of hepatitis B and hepatitis C in patients with thalassemia and sickle cell anemia in a long-term follow-up. *Archives of medical research*, 37(7), 895
- Said H S Al Dhahry, Shahina Daar, Jameel C Nograles, Situsekara M W W B Rajapakse, Fadhila S S Al Toqi, Geraldine Z Kaminski** (2002//). Fluctuating antibody response in a cohort of hepatitis C patients. *Journal for scientific research. Medical sciences / Sultan Qaboos University*, 4(1-2), 33
- Salwa Bdour** (2002//). Hepatitis C virus infection in Jordanian haemodialysis units: serological diagnosis and genotyping. *Journal of medical microbiology*, 51(8), 700
- Samantha J Shepherd, Joy Kean, Sharon J Hutchinson, Sheila O Cameron, David J Goldberg, William F Carman, Rory N Gunson, Celia Aitken** (2013//). A hepatitis C avidity test for determining recent and past infections in both plasma and dried blood spots. *Journal of clinical virology : the official publication of the Pan American Society for Clinical Virology*, 57(1), 29
- Sami A Gabr, Ahmad H Alghadir** (2014//). Prediction of fibrosis in hepatitis C patients: assessment using hydroxyproline and oxidative stress biomarkers. *Virusdisease*, 25(1), 91
- Samir El-Masry, Mahmoud Lotfy, Mohamed El-Shahat, Gamal Badra** (2006//). Serum laminin

assayed by Slot-Blot-ELISA in patients with combined viral hepatitis C and schistosomiasis. *Clinical biochemistry*, 39(6), 652

**Sandra Beinhardt, Judith H Aberle, Michael Strasser, Emina Dulic-Lakovic, Andreas Maieron, Anna Kreil, Karoline Rutter, Albert F Staettermayer, Christian Datz, Thomas M Scherzer, Robert Strassl, Martin Bischof, Rudolf Stauber, Gerd Bodlaj, Hermann Laferl, Heidemarie Holzmann, Petra Steindl-Munda, Peter Ferenci, Harald Hofer** (2012//). Serum level of IP-10 increases predictive value of IL28B polymorphisms for spontaneous clearance of acute HCV infection. *Gastroenterology*, 142(1), 78

**Sandrine Loubiere, Jean-Paul Moatti** (2003//). Cost-effectiveness of hepatitis C screening of blood donations. *Expert review of pharmacoeconomics & outcomes research*, 3(1), 47

**Sangeeta Pahuja, Santosh Kumar Gupta, Mukta Pujani, Manjula Jain** (2014//). Treponema pallidum hemagglutination assay seroreactivity among healthy Indian donors and its association with other transfusion transmitted diseases. *Asian journal of transfusion science*, 8(2), 109

**Sangeeta Pathak, M Chandrashekhar** (2013//). Transfusion transmittable infections - Seroprevalence among blood donors in a tertiary care hospital of Delhi. *Asian journal of transfusion science*, 7(2), 116

**Sansan Lin, Phillip Arcangel, Angelica Medina-Selby, Doris Coit, Philip Ng, Steve Nguyen, Colin McCoin, Alex Gyenes, Celine Hu, Laura Tandeske, Bruce Phelps, David Chien** (2005//). Design of novel conformational and genotype-specific antigens for improving sensitivity of immunoassays for hepatitis C virus-specific antibodies. *Journal of clinical microbiology*, 43(8), 3917

**Sara Mohammadzadeh, Farzin Roohvand, Soheila Ajdary, Parastoo Ehsani, Ali Hatef Salmanian** (2015//). Heterologous Expression of Hepatitis C Virus Core Protein in Oil Seeds of Brassica napus L. *Jundishapur journal of microbiology*, 8(11), e25462

**Sayed F Abdelwahab, Zainab Zakaria, Maha Sobhy, Eman Rewisha, Mohamed A Mahmoud, Mahmoud A Amer, Mariarosaria Del Sorbo, Stefania Capone, Alfredo Nicosia, Antonella Folgori, Mohamed Hashem, Samer S El-Kamary** (2012//). Hepatitis C virus-multispecific T-cell responses without viremia or seroconversion among Egyptian health care workers at high risk of infection. *Clinical and vaccine immunology : CVI*, 19(5), 780

**Sayeh Ezzikouri, Kiminori Kimura, Hajime Sunagozaka, Shuichi Kaneko, Kazuaki Inoue, Tomohiro Nishimura, Tsunekazu Hishima, Michinori Kohara, Kyoko Tsukiyama-Kohara** (2015//). Serum DHCR24 Auto-antibody as a new Biomarker for Progression of Hepatitis C. *EBioMedicine*, 2(6), 604

**Semra Paydas, Melek Ergin, Kahraman Tanriverdi, Sinan Yavuz, Umut Disel, Nil Banu Kilic, Seyda Erdogan, Berksoy Sahin, Ilhan Tuncer, Refik Burgut** (2004//). Detection of hepatitis C virus RNA in paraffin-embedded tissues from patients with non-Hodgkin's lymphoma. *American journal of hematology*, 76(3), 252

**Seong-Jun Kim, Jung-Hee Kim, Yeon-Gu Kim, Ho-Soo Lim, Jong-Won Oh** (2004//). Protein kinase C-related kinase 2 regulates hepatitis C virus RNA polymerase function by phosphorylation. *The Journal of biological chemistry*, 279(48), 50031

**Sergei Viazov, Stefan S Ross, Karen K Kyuregyan, Joerg Timm, Christoph Neumann-Haefelin, Olga V Isaeva, Oksana E Popova, Petr N Dmitriev, Fathia El Sharkawi, Robert Thimme, Michail I Michailov, Michael Roggendorf** (2010//). Hepatitis C virus recombinants are rare even among intravenous drug users. *Journal of medical virology*, 82(2), 232

**Sergey A Shiryaev, Ilian A Radichev, Boris I Ratnikov, Alexander E Aleshin, Katarzyna Gawlik, Boguslaw Stec, Christian Frisch, Achim Knappik, Alex Y Strongin** (2010//). Isolation and characterization of selective and potent human Fab inhibitors directed to the active-site region of the two-component NS2B-NS3 proteinase of West Nile virus. *The Biochemical journal*, 427(3), 369

**Sergio Batista-dos-Santos, Milene Raiol, Sidney Santos, Maristela G Cunha, Andrea Ribeiro-dos-Santos** (2012//). Real-time PCR diagnosis of Plasmodium vivax among blood donors. *Malaria journal*, 11(#issue#), 345

**Seung Gyu Yun, Jin Woo Jang, Jong Han Lee, Chae Seung Lim, Jinhong Kim, Yeona Ki, Minjoung Jo, Soyoun Kim** (2015//). Evaluation of Novel Multiplex Antibody Kit for Human Immunodeficiency Virus 1/2 and Hepatitis C Virus Using Sol-Gel Based Microarray. *BioMed research international*, 2015(#issue#), 837296

**Shahab Saqib, Muhammad Zuhaib Khan, Sayed Irtiza Hussain Shah Gardyzi, Javaria Qazi** (2016//). Prevalence and epidemiology of blood borne pathogens in health care workers of Rawalpindi/Islamabad. *JPMA. The Journal of the Pakistan Medical Association*, 66(2), 170



**Shahila Parween, Pradip Nahar** (2016//). Ultraminiaturized assay for rapid, low cost detection and quantification of clinical and biochemical samples. *Biomedical microdevices*, 18(2), 33

**Shali Shi, Xiaoyan Yu, Yimin Gao, Binbin Xue, Xinjiao Wu, Xiaohong Wang, Darong Yang, Haizhen Zhu** (2014//). Inhibition of hepatitis C virus production by aptamers against the core protein. *Journal of virology*, 88(4), 1990

**Shaoxia Xu, Qiaofeng Wang, Weihong Zhang, Zhifeng Qiu, Jingtao Cui, Wenjuan Yan, Anping Ni** (2015//). Seroprevalence of the Hepatitis B, Hepatitis C, and Human Immunodeficiency Viruses and *Treponema pallidum* at the Beijing General Hospital from 2010 to 2014: A Cross-Sectional Study. *PLoS one*, 10(10), e0140854

**Shaoyong Li, Lianne E M Vriend, Imad A Nasser, Yury Popov, Nezam H Afdhal, Margaret J Koziel, Detlef Schuppan, Mark A Exley, Nadia Alatrakchi** (2012//). Hepatitis C virus-specific T-cell-derived transforming growth factor beta is associated with slow hepatic fibrogenesis. *Hepatology (Baltimore, Md.)*, 56(6), 2094

**Shazia Rafique, Muhammad Idrees, Amjad Ali, Muhammad Iqbal** (2014//). Studies on the role of neutralizing antibodies against envelope genes in resolving HCV pseudo-particles infection. *Molecular biology reports*, 41(6), 3945

**Shiji Wu, Yanling Liu, Liming Cheng, Botao Yin, Jing Peng, Ziyong Sun** (2011//). Clinical evaluation of the signal-to-cutoff ratios of hepatitis C virus antibody screening tests used in China. *Journal of medical virology*, 83(11), 1930

**Shilpee Choudhry, V G Ramachandran, Shukla Das, S N Bhattacharya, Narendra Singh Mogha** (2009//). Serological profile of HSV-2 in patients attending STI clinic: evaluation of diagnostic utility of HSV-2 IgM detection. *Indian journal of pathology & microbiology*, 52(3), 353

**Shinobu Kitazume, Ritsuko Oka, Kazuko Ogawa, Satoshi Futakawa, Yoshiaki Hagiwara, Hajime Takikawa, Michio Kato, Akinori Kasahara, Eiji Miyoshi, Naoyuki Taniguchi, Yasuhiro Hashimoto** (2009//). Molecular insights into beta-galactoside alpha2,6-sialyltransferase secretion in vivo. *Glycobiology*, 19(5), 479

**Shirley Owusu-Ofori, Jillian Temple, Francis Sarkodie, Margaret Anokwa, Daniel Candotti, Jean-Pierre Allain** (2005//). Predonation screening of blood donors with rapid tests: implementation and efficacy of a novel approach to

blood safety in resource-poor settings. *Transfusion*, 45(2), 133

**Shivaram Chandrashekar** (2014//). Half a decade of mini-pool nucleic acid testing: Cost-effective way for improving blood safety in India. *Asian journal of transfusion science*, 8(1), 35

**Shuang-Yuan Kuang, Suree Lekawanvijit, Niwat Maneekarn, Satawat Thongsawat, Kimberly Brodovicz, Kenrad Nelson, John D Groopman** (2005//). Hepatitis B 1762T/1764A mutations, hepatitis C infection, and codon 249 p53 mutations in hepatocellular carcinomas from Thailand. *Cancer epidemiology, biomarkers & prevention : a publication of the American Association for Cancer Research, cosponsored by the American Society of Preventive Oncology*, 14(2), 380

**Silvia de Sanjose, Yolanda Benavente, Claire M Vajdic, Eric A Engels, Lindsay M Morton, Paige Bracci, John J Spinelli, Tongzhang Zheng, Yawei Zhang, Silvia Franceschi, Renato Talamini, Elizabeth A Holly, Andrew E Grulich, James R Cerhan, Patricia Hartge, Wendy Cozen, Paolo Boffetta, Paul Brennan, Marc Maynadie, Pierluigi Cocco, Ramon Bosch, Lenka Foretova, Anthony Staines, Nikolaus Becker, Alexandra Nieters** (2008//). Hepatitis C and non-Hodgkin lymphoma among 4784 cases and 6269 controls from the International Lymphoma Epidemiology Consortium. *Clinical gastroenterology and hepatology : the official clinical practice journal of the American Gastroenterological Association*, 6(4), 451

**Silvia Garazzino, Carmelina Calitri, Antonella Versace, Alda Alfarano, Carlo Scolfaro, Chiara Bertaina, Simona Vatrano, Federica Mignolo, Francesco Licciardi, Clara Gabiano, Pier-Angelo Tovo** (2014//). Natural history of vertically acquired HCV infection and associated autoimmune phenomena. *European journal of pediatrics*, 173(8), 1025

**Soheir Abdel Latif Eissa, Lobna Mostafa Abdel Meguid, Samir Morqus Ebeid, Randa Mohamed Abou Elfetouh, Gamal Mohamed Abdel Moneim** (2007//). National Cancer Institute Experience in Healthy Egyptian Blood Donors as Regards Blood Group Frequencies and Seroprevalence of Hepatitis B Virus, Hepatitis C Virus&HIV: 10 Year Evaluation. *Journal of the Egyptian National Cancer Institute*, 19(1), 71

**Soheir S Mansy, Mona M Nosseir, Mona A Zoheiry, Moetaz H Hassanein, Mohammed F Guda, May M Othman, Hoda AbuTalab** (2014//). Value of reelin for assessing hepatic fibrogenesis in a group of Egyptian HCV infected patients. *Clinical chemistry and laboratory medicine : CCLM / FESCC*,

52(9), 1319

**Stefan Kraus, Michael Kleines, Jorg Albers, Lars Blohm, Gundula Piechotta, Christiane Puttmann, Stefan Barth, Jorg Nahring, Eric Nebling** (2011//). Quantitative measurement of human anti-HCV Core immunoglobulins on an electrical biochip platform. *Biosensors & bioelectronics*, 26(5), 1895

**Stella Gabeta, Gary L Norman, Christos Liaskos, Panagiotis A Papamichalis, Theodoros Zografos, Athanasios Garagounis, Eirini I Rigopoulou, George N Dalekos** (2007//). Diagnostic relevance and clinical significance of the new enhanced performance M2 (MIT3) ELISA for the detection of IgA and IgG antimitochondrial antibodies in primary biliary cirrhosis. *Journal of clinical immunology*, 27(4), 378

**Stephane Chevaliez, Alexandre Soulier, Lila Poiteau, Magali Bouvier-Alias, Jean-Michel Pawlotsky** (2014//). Clinical utility of hepatitis C virus core antigen quantification in patients with chronic hepatitis C. *Journal of clinical virology : the official publication of the Pan American Society for Clinical Virology*, 61(1), 145

**Stephane Chevaliez, Jean-Michel Pawlotsky** (2012//). Virology of hepatitis C virus infection. *Best practice & research. Clinical gastroenterology*, 26(4), 381

**Stephane Chevaliez, Jean-Michel Pawlotsky** (2005//). [Screening and diagnosis of hepatitis B and C]. *La Revue du praticien*, 55(6), 615

**Stephen R Lee, Keith W Kardos, Eugene Schiff, Cheryl A Berne, Karam Mounzer, Alpha T Banks, Harvey A Tatum, Timothy J Friel, Michael P Demicco, William M Lee, Scott E Eder, Alexander Monto, Graham D Yearwood, Geraldine B Guillon, Lisa A Kurtz, Mark Fischl, Jay Lynn Unangst, Laura Kriebel, Gary Feiss, Michele Roehler** (2011//). Evaluation of a new, rapid test for detecting HCV infection, suitable for use with blood or oral fluid. *Journal of virological methods*, 172(1-2), 27

**Steven K Herrine, Beckie Michael, Wai Li Ma, Simona Rossi, Stephen R Dunn, Theresa Hyslop** (2002//). Development of an HCV infection risk stratification algorithm for patients on chronic hemodialysis. *The American journal of gastroenterology*, 97(10), 2619

**Subhash Medhi, Sai K Potukuchi, Sunil K Polipalli, Shyam S Swargiary, Purabi Deka, Anis Chaudhary, Anish Choudhary, Nargis Begum, Zahid Hussain, R S Ahlawat, Premashis Kar** (2008//). Diagnostic utility of hepatitis C virus core

antigen in hemodialysis patients. *Clinical biochemistry*, 41(7-8), 447

**Surabhi Tyagi, Alok Tyagi** (2013//). Possible Correlation of Transfusion Transmitted Diseases with Rh type and ABO Blood Group System. *Journal of clinical and diagnostic research : JCDR*, 7(9), 1930

**Susana Vitozzi, Pascal Lapierre, Idriss Djilali-Saiah, Fernando Alvarez** (2002//). Autoantibody detection in type 2 autoimmune hepatitis using a chimera recombinant protein. *Journal of immunological methods*, 262(1-2), 103

**Susana Vitozzi, Pascal Lapierre, Idriss Djilali-Saiah, Gabriel Marceau, Kathie Beland, Fernando Alvarez** (2004//). Anti-soluble liver antigen (SLA) antibodies in chronic HCV infection. *Autoimmunity*, 37(3), 217

**Susmita Maity, Srijita Nandi, Subrata Biswas, Salil Kumar Sadhukhan, Malay Kumar Saha** (2012//). Performance and diagnostic usefulness of commercially available enzyme linked immunosorbent assay and rapid kits for detection of HIV, HBV and HCV in India. *Virology journal*, 9(#issue#), 290

**Susumu Imaoka, Noriko Obata, Toyoko Hiroi, Mayuko Osada-Oka, Rie Hara, Shuhei Nishiguchi, Yoshihiko Funae** (2005//). A new epitope of CYP2D6 recognized by liver kidney microsomal autoantibody from Japanese patients with autoimmune hepatitis. *Biological & pharmaceutical bulletin*, 28(12), 2240

**Suzan D Pas, Roel H R A Streefkerk, Mark Pronk, Robert A de Man, Matthias F Beersma, Albert D M E Osterhaus, Annemiek A van der Eijk** (2013//). Diagnostic performance of selected commercial HEV IgM and IgG ELISAs for immunocompromised and immunocompetent patients. *Journal of clinical virology : the official publication of the Pan American Society for Clinical Virology*, 58(4), 629

**Syria Laperche, C Micha Nubling, Susan L Stramer, Ewa Brojer, Piotr Grabarczyk, Hiroshi Yoshizawa, Vytenis Kalibatas, Magdy El Elkyabi, Faten Moftah, Annie Girault, Harry van Drimmelen, Michael P Busch, Nico Lelie** (2015//). Sensitivity of hepatitis C virus core antigen and antibody combination assays in a global panel of window period samples. *Transfusion*, 55(10), 2489

**Syria Laperche, Genevieve Boukatou, Leonard Kouegnigan, Yacouba Nebie, Mohamed Ould Boulahi, Claude Tayou Tagny, Rakia Yahaya, Jean-Baptiste Tapko, Edward Murphy, Jean Jacques Lefrere** (2009//). Transfusion safety on

the African continent: an international quality control of virus testing in blood banks. *Transfusion*, 49(8), 1600

**Syria Laperche, Nadine Le Marrec, Annie Girault, Francoise Bouchardeau, Annabelle Servant-Delmas, Michele Maniez-Montreuil, Pierre Gallian, Thierry Levayer, Pascal Morel, Nicole Simon** (2005//). Simultaneous detection of hepatitis C virus (HCV) core antigen and anti-HCV antibodies improves the early detection of HCV infection. *Journal of clinical microbiology*, 43(8), 3877

**Syria Laperche, Nadine Le Marrec, Nicole Simon, Francoise Bouchardeau, Christine Defer, Michele Maniez-Montreuil, Thierry Levayer, Jean-Pierre Zappitelli, Jean-Jacques Lefrere** (2003//). A new HCV core antigen assay based on disassociation of immune complexes: an alternative to molecular biology in the diagnosis of early HCV infection. *Transfusion*, 43(7), 958

**Syria Laperche, Francophone African Group for Research in Blood Transfusion** (2013//). Multinational assessment of blood-borne virus testing and transfusion safety on the African continent. *Transfusion*, 53(4), 816

**T A Cha, J Kolberg, B Irvine, M Stempien, E Beall, M Yano, Q L Choo, M Houghton, G Kuo, J H Han** (1991//). Use of a signature nucleotide sequence of hepatitis C virus for detection of viral RNA in human serum and plasma. *Journal of clinical microbiology*, 29(11), 2528

**T Bizollon, S N Ahmed, S Guichard, P Chevallier, M Adham, C Ducerf, J Baulieux, C Trepo** (2000//). Anti-hepatitis C virus core IgM antibodies correlate with hepatitis C recurrence and its severity in liver transplant patients. *Gut*, 47(5), 698

**T Dao, I Lecointe, F Galateau, F Freymuth, A Rideau, J C Verwaerde, A Valla** (1993//). [Contribution of liver biopsy and serology of hepatitis C virus to the diagnosis of a moderate and prolonged elevation of aminotransferases]. *Gastroenterologie clinique et biologique*, 17(1), 37

**T G Morales, R E Sampliner, A Bhattacharyya, M J Alter** (1995//). Liver histology in anti-HCV-positive persons with normal or minimally elevated aminotransferases. *Journal of clinical gastroenterology*, 21(4), 301

**T Goeser, H M Muller, C Solbach, K Gmelin, F Kurzen, B Kommerell, L Theilmann** (1994//). Prevalence and serological manifestation of hepatitis C virus infection in patients with hepatitis non-A, non-B: a follow-up study. *Presse medicale*

(Paris, France : 1983), 23(17), 793

**T Heintges, L Mohr, C Niederau, F Scheffele, F Hensel, D Haussinger** (1998//). Quantitative hepatitis C RNA-polymerase chain reaction and detection with DNA-ELISA. *Hepato-gastroenterology*, 45(23), 1684

**T Karamitros, A Kakkanas, A Katsoulidou, V Sypsa, G Dalagiorgou, P Mavromara, A Hatzakis** (2012//). Detection of specific antibodies to HCV-ARF/CORE+1 protein in patients treated with pegylated interferon plus ribavirin. *Journal of viral hepatitis*, 19(3), 182

**T Kashiwakuma, A Hasegawa, T Kajita, A Takata, H Mori, Y Ohta, E Tanaka, K Kiyosawa, T Tanaka, S Tanaka, N Hattori, M Kohara** (1996//). Detection of hepatitis C virus specific core protein in serum of patients by a sensitive fluorescence enzyme immunoassay (FEIA). *Journal of immunological methods*, 190(1), 79

**T Konry, A Novoa, Y Shemer-Avni, N Hanuka, S Cosnier, Arielle Lepellec, R S Marks** (2005//). Optical fiber immunosensor based on a poly(pyrrole-benzophenone) film for the detection of antibodies to viral antigen. *Analytical chemistry*, 77(6), 1771

**T L Fong, G C Kanel, A Conrad, B Valinluck, F Charboneau, R H Adkins** (1994//). Clinical significance of concomitant hepatitis C infection in patients with alcoholic liver disease. *Hepatology (Baltimore, Md.)*, 19(3), 554

**T L Wright, H Hollander, X Pu, M J Held, P Lipson, S Quan, A Polito, M M Thaler, P Bacchetti, B F Scharschmidt** (1994//). Hepatitis C in HIV-infected patients with and without AIDS: prevalence and relationship to patient survival. *Hepatology (Baltimore, Md.)*, 20(5), 1152

**T M Chan, A S Lok, I K Cheng, R T Chan** (1993//). Prevalence of hepatitis C virus infection in hemodialysis patients: a longitudinal study comparing the results of RNA and antibody assays. *Hepatology (Baltimore, Md.)*, 17(1), 5

**T M McHugh, M K Viele, E S Chase, D J Recktenwald** (1997//). The sensitive detection and quantitation of antibody to HCV by using a microsphere-based immunoassay and flow cytometry. *Cytometry*, 29(2), 106

**T Matsubara, R Sumazaki, H Takita** (1995//). Mother-to-infant transmission of hepatitis C virus: a prospective study. *European journal of pediatrics*, 154(12), 973

**T Mazda, K Nakata, M Bannai, T Miyamura, J**

- Chiba, H Ohba, Y Kaminuma, T Katayama** (1993//). Follow-up study of anti-hepatitis C virus antibodies in blood donors implicated in post-transfusion non-A, non-B hepatitis. *Transfusion medicine (Oxford, England)*, 3(2), 149
- T Orth, G Gerken, K H Meyer Zum Buschenfelde, W J Mayet** (1997//). Antineutrophil nuclear antibodies (ANNA) in primary biliary cirrhosis: their prevalence and antigen specificity. *Zeitschrift fur Gastroenterologie*, 35(2), 113
- T Perez-Gracia, F Galan, C Fernandez-Gutierrez, J A Giron, M Rodriguez-Iglesias** (1999//). Relationship of hepatitis C viremia to HIV state and to infection by specific hepatitis C genotypes. *Liver*, 19(4), 288
- T Peters, L Mohr, F Scheiffele, H J Schlayer, S Preisler, H Berthold, W Gerok, J Rasenack** (1994//). Antibodies and viremia in acute post-transfusion hepatitis C: a prospective study. *Journal of medical virology*, 42(4), 420
- T Tallo, M Lappalainen, V Tefanova, I Priimagi** (2000//). Distribution of hepatitis C virus genotypes in patients with chronic hepatitis C in northern Estonia. *Acta virologica*, 44(3), 175
- T Tanaka, K Tsukiyama-Kohara, K Yamaguchi, S Yagi, S Tanaka, A Hasegawa, Y Ohta, N Hattori, M Kohara** (1994//). Significance of specific antibody assay for genotyping of hepatitis C virus. *Hepatology (Baltimore, Md.)*, 19(6), 1347
- T Weinstein, R Tur-Kaspa, A Chagnac, A Korzets, Y Ori, D Zevin, M Herman, U Gafter** (2001//). Hepatitis C infection in dialysis patients in Israel. *The Israel Medical Association journal : IMAJ*, 3(3), 174
- Takeji Umemura, Richard Y-H Wang, Cathy Schechterly, J Wai-Kuo Shih, Kendo Kiyosawa, Harvey J Alter** (2006//). Quantitative analysis of anti-hepatitis C virus antibody-secreting B cells in patients with chronic hepatitis C. *Hepatology (Baltimore, Md.)*, 43(1), 91
- Talat J H Rizvi, Hassan Fatima** (2003//). Frequency of hepatitis C in obstetric cases. *Journal of the College of Physicians and Surgeons--Pakistan : JCPSP*, 13(12), 688
- Tatsuji Kimura, Akinori Rokuhara, Akihiro Matsumoto, Shintaro Yagi, Eiji Tanaka, Kendo Kiyosawa, Noboru Maki** (2003//). New enzyme immunoassay for detection of hepatitis B virus core antigen (HBcAg) and relation between levels of HBcAg and HBV DNA. *Journal of clinical microbiology*, 41(5), 1901
- Tatsuji Kimura, Akinori Rokuhara, Yoko Sakamoto, Shintaro Yagi, Eiji Tanaka, Kendo Kiyosawa, Noboru Maki** (2002//). Sensitive enzyme immunoassay for hepatitis B virus core-related antigens and their correlation to virus load. *Journal of clinical microbiology*, 40(2), 439
- Timo Rath, Lisa Hage, Marion Kugler, Katrin Menendez Menendez, Reinhart Zchoval, Lutz Naehrlich, Richard Schulz, Martin Roderfeld, Elke Roeb** (2013//). Serum proteome profiling identifies novel and powerful markers of cystic fibrosis liver disease. *PLoS one*, 8(3), e58955
- Tingxiu Xiang, Zheng Jiang, Jian Zheng, Chaoyu Lo, Harry Tsou, Guosheng Ren, Jun Zhang, Ailong Huang, Guoqi Lai** (2012//). A novel double antibody sandwich-lateral flow immunoassay for the rapid and simple detection of hepatitis C virus. *International journal of molecular medicine*, 30(5), 1041
- Tobias Hitziger, Michael Schmidt, Volkmar Schottstedt, Holger Hennig, Alexandra Schumann, Stefan Ross, Mengji Lu, Erhard Seifried, Michael Roggendorf** (2009//). Cellular immune response to hepatitis C virus (HCV) in nonviremic blood donors with indeterminate anti-HCV reactivity. *Transfusion*, 49(7), 1306
- Tohti Amet, Marwan Ghabril, Naga Chalasani, Daniel Byrd, Ningjie Hu, Ayslinn Grantham, Ziqing Liu, Xuebin Qin, Johnny J He, Qigui Yu** (2012//). CD59 incorporation protects hepatitis C virus against complement-mediated destruction. *Hepatology (Baltimore, Md.)*, 55(2), 354
- Torsten Feldt, Fred Stephen Sarfo, Alexander Zoufaly, Richard Odame Phillips, Gerd Burchard, Jan van Lunzen, Johannes Jochum, David Chadwick, Charles Awasom, Lisa Claussen, Christian Drosten, Jan Felix Drexler, Anna Maria Eis-Hubinger** (2013//). Hepatitis E virus infections in HIV-infected patients in Ghana and Cameroon. *Journal of clinical virology : the official publication of the Pan American Society for Clinical Virology*, 58(1), 18
- Toyoichiro Kudo, Aiko Kido, Yukiko Nishiyama, Hiroshi Koganeya, Takako Okuda, Motoshige Nabeshima, Yoshitsugu Iinuma, Satoshi Ichiyama** (2004//). Whole-blood counting immunoassay as a short-turnaround test for detection of hepatitis B surface antigen, anti-hepatitis C virus antibodies, and anti-Treponema pallidum antibodies. *Journal of clinical microbiology*, 42(9), 4250
- Tagliavini S.A., Mikawa A.Y., Yamanaka H., Henrique-Silva F., Costa P.I.** (2008//). Polysiloxane-poly(propylene oxide) hybrid discs as solid phase in anti-HCV detection using a

recombinant core protein *Talanta*, 75(2), 461

**Takamatsu J., Tsuda F., Okudaira M.** (1998//). Infection with GB virus C, hepatitis C and B viruses in 1,044 cases autopsied at the Medical Examiner's Office in Tokyo *Journal of Medical Virology*, 55(2), 123

**Takano S., Omata M., Ohto M., Satomura Y.** (1993//). Prospective assessment of donor blood screening for antibody to hepatitis C virus and high-titer antibody to HBcAg as a means of preventing posttransfusion hepatitis *Hepatology*, 18(2), 235

**Takao Y., Yamada A., Yutani S., Sata M., Itoh K.** (2004//). Antibody reactive to a hepatitis C virus (HCV)-derived peptide capable of inducing HLA-A2 restricted cytotoxic T lymphocytes is detectable in a majority of HCV-infected individuals without HLA-A2 restriction *Microbiology and Immunology*, 48(7), 507

**Taliani G., Badolato M.C., Lecce R., De Bac C., De Marzio E., Balsano C., Artini M., Levrero M.** (1992//). Recombinant immunoblot assay for hepatitis C virus antibody in chronic hepatitis *Archives of virology. Supplementum*, 4(#issue#), 232

**Taura N., Ichikawa T., Miyaaki H., Ozawa E., Tsutsumi T., Tsuruta S., Kato Y., Goto T., Kinoshita N., Fukushima M., Kato H., Ohata K., Ohba K., Masuda J., Hamasaki K., Yatsushiro H., Nakao K.** (2013//). Frequency of elevated biomarkers in patients with cryptogenic hepatocellular carcinoma *Medical Science Monitor*, 19(1), 742

**Tejada-Strop A., Drobeniuc J., Mixson-Hayden T., Forbi J.C., Le N.-T., Li L., Mei J., Terrault N., Kamili S.** (2015//). Disparate detection outcomes for anti-HCV IgG and HCV RNA in dried blood spots *Journal of virological methods*, 212(#issue#), 66

**Terjung B., Bogsch F., Klein R., Sohne J., Reichel C., Wasmuth J.C., Beuers U., Sauerbruch T., Spengler U.** (2004//). Diagnostic accuracy of atypical p-ANCA in autoimmune hepatitis using ROC- and multivariate regression analysis *European journal of medical research*, 9(9), 439

**Terzic D., Brmbolic B., Jevtovic D., Dupanovic B., Korac M., Selemovic D., Svirtlih N., Draskovic N., Mugosa B., Boricic I., Terzic Z.** (2008//). Liver enlargement associated with opportunistic infections in patients with human immunodeficiency virus infection *Journal of Gastrointestinal and Liver Diseases*, 17(4), 401

**Tong W., Gao W., Fei R., Feng B., Tao Q.** (1999//). Development of a universal immunoenzyme quantitative assay for detecting amplified products of nucleic acid and its preliminary application in hepatitis C virus *Chinese medical journal*, 112(5), 392

**Torane V., Shastri J.** (2008//). Comparison of ELISA and rapid screening tests for the diagnosis of HIV, hepatitis B and hepatitis C among healthy blood donors in a tertiary care hospital in Mumbai *Indian Journal of Medical Microbiology*, 26(3), 284

**Trepo C.** (1990//). Hepatitis virus C: from discovery to applications in public health *La Revue du praticien*, 40(18), 1631

**Trerotoli P., Fransvea E., Angelotti U., Antonaci G., Lupo L., Mazzocca A., Mangia A., Antonaci S., Giannelli G.** (2009//). Tissue expression of Squamous Cellular Carcinoma Antigen (SCCA) is inversely correlated to tumor size in HCC *Molecular Cancer*, 8(#issue#), no pagination

**Tseliou P., Spiliotakara A., Dimitracopoulos G.O., Christofidou M.** (2000//). Detection of hepatitis B virus DNA in blood units with anti-HBc as the only positive serological marker *Haematologia*, 30(3), 159

**Tsertsvadze T., Sharvadze L., Dzigua L., Dolmazashvili E., Nelson K.E.** (2008//). Acute/recent HCV infection. Clinical course, viral replication kinetics and disease outcome *Georgian medical news*, #volume#(165), 43

**Umemura T., Tanaka E., Ota M., Orii K., Yoshizawa K., Imai H., Sodeyama T., Kiyosawa K.** (1999//). TT virus infection in an area of high-endemicity for hepatitis C *Hepatology Research*, 13(3), 212

**Ummate I., Denué B.A., Kida I.M., Ohioma O.J., Baba D.B., Goni W.** (2014//). Risk factors for hepatitis C virus sero-positivity among haemodialysis patients receiving care at kidney centre in a tertiary health facility in Maiduguri, Nigeria *The Pan African medical journal*, 19(#issue#), 305

**Ur Rahman M., Akhtar G.N., Qadeer M., Shams T., Usmani A., Lodhi Y.** (2003//). Safe blood begins with safe donors *Pakistan Journal of Medical Sciences*, 19(3), 161

**Urbes F., Fruchart J.-S., Gras-Masse H., Melnyk O.** (2002//). C-terminal glyoxylyl peptides for sensitive enzyme-linked immunosorbent assays *Letters in Peptide Science*, 8(3-5), 253

**U B Hellstrom, S P Sylvan, R H Decker, A Sonnerborg** (1993//). Immunoglobulin M

reactivity towards the immunologically active region sp75 of the core protein of hepatitis C virus (HCV) in chronic HCV infection. *Journal of medical virology*, 39(4), 325

**U L Mathiesen, B Ekermo, U Foberg, L Franzen, A Fryden, R Norlin, L G Pettersson, H Sterling, A Widell, G Bodemar** (1992//). Anti-hepatitis C virus screening will reduce the incidence of post-transfusion hepatitis C also in low-risk areas. *Scandinavian journal of gastroenterology*, 27(6), 443

**U Magriples, P Bernstein, E Snyder, J A Copel** (1998//). Can risk factor screening predict hepatitis C antibody reactivity?. *American journal of perinatology*, 15(6), 395

**U Schacker, H P Bermayer, V Boehler, D Ionescu, M Zapata, H Grauer, K Rai** (1995//). Rapid HCV RNA detection by PCR followed by a new non-radioactive liquid hybridisation assay and comparison with RIBA. *Journal of medical virology*, 46(4), 304

**U Sengler, T Reinhard, O Adams, W Gerlich, R Sundmacher** (2001//). Testing of corneal discs and their culture media of seropositive donors for hepatitis B and C virus genomes. *Graefes archive for clinical and experimental ophthalmology = Albrecht von Graefes Archiv fur klinische und experimentelle Ophthalmologie*, 239(10), 783

**U Wienhues, E Faatz, W Melchior, H Bayer** (1993//). Boehringer Mannheim modular test concepts in HIV and hepatitis immunoassays. *Clinical biochemistry*, 26(4), 295

**U Zimmermann, L Love-Homan, P Gessner, D Clark, G Klock, F C Johlin, G A Neil** (1995//). Generation of a human monoclonal antibody to hepatitis C virus, JRA1 by activation of peripheral blood lymphocytes and hypo-osmolar electrofusion. *Human antibodies and hybridomas*, 6(2), 77

**Uluhan Sili, Abdurrahman Kaya, Selda Aydin, Nur Hondur, Ali Mert, Fehmi Tabak, Resat Ozaras, Recep Ozturk** (2015//). HCV-specific lymphocyte responses in individuals with positive anti-HCV but negative HCV-RNA. *Journal of clinical virology : the official publication of the Pan American Society for Clinical Virology*, 67(#issue#), 73

**Umberto Basile, Francesca Gulli, Eleonora Torti, Nicoletta De Matthaeis, Luigi Colacicco, Paola Cattani, Gian Lodovico Rapaccini** (2015//). Anti-nuclear antibody detection in cryoprecipitates: distinctive patterns in hepatitis C virus-infected

patients. *Digestive and liver disease : official journal of the Italian Society of Gastroenterology and the Italian Association for the Study of the Liver*, 47(1), 50

**Usha K Sharma, Susan L Stramer, David J Wright, Simone A Glynn, Sigurd Hermansen, George B Schreiber, Steven H Kleinman, Michael P Busch, Retrovirus Epidemiology Donor Study** (2003//). Impact of changes in viral marker screening assays. *Transfusion*, 43(2), 202

**V Bhattacharjee, L E Prescott, I Pike, B Rodgers, H Bell, A R El-Zayadi, M C Kew, J Conradie, C K Lin, H Marsden** (1995//). Use of NS-4 peptides to identify type-specific antibody to hepatitis C virus genotypes 1, 2, 3, 4, 5 and 6. *The Journal of general virology*, 76 ( Pt 7)(#issue#), 1737

**V Gonzalez, E Martro, C Folch, A Esteve, L Matas, A Montoliu, J R Grifols, F Bolao, C Tural, R Muga, J V Parry, V Ausina, J Casabona** (2008//). Detection of hepatitis C virus antibodies in oral fluid specimens for prevalence studies. *European journal of clinical microbiology & infectious diseases : official publication of the European Society of Clinical Microbiology*, 27(2), 121

**V J Martlew, P Carey, C Y Tong, J V Parry, F J Belda, K L Barlow, P Chu, Q Syed** (2000//). Post-transfusion HIV infection despite donor screening: a report of three cases. *The Journal of hospital infection*, 44(2), 93

**Vana Sypsa, Mina Psychogiou, Antigoni Katsoulidou, Gregory Skoutelis, Spiridon Moutafis, Valsamakis Hadjiconstantinou, John Kakavas, Viktoria Kalapothaki, John Boletis, Angelos Hatzakis** (2005//). Incidence and patterns of hepatitis C virus seroconversion in a cohort of hemodialysis patients. *American journal of kidney diseases : the official journal of the National Kidney Foundation*, 45(2), 334

**Vinaya Rao, Fabrizio Fabrizi, Phillip Pennell, Eugene Schiff, Maria de Medina, Jeannine R Lane, Paul Martin, Linda Ivor** (2010//). Improved detection of hepatitis C virus infection by transcription-mediated amplification technology in dialysis population. *Renal failure*, 32(6), 721

**Vinca Icard, Olivier Diaz, Caroline Scholtes, Laure Perrin-Cocon, Christophe Ramiere, Ralf Bartenschlager, Francois Penin, Vincent Lotteau, Patrice Andre** (2009//). Secretion of hepatitis C virus envelope glycoproteins depends on assembly of apolipoprotein B positive lipoproteins. *PLoS one*, 4(1), e4233

**Vincent Aubert, Isabelle Graf Pisler, Francois Spertini** (2008//). Improved diagnoses of

autoimmune hepatitis using an anti-actin ELISA. *Journal of clinical laboratory analysis*, 22(5), 340

**Vincent Leroy, Frederique Monier, Serge Bottari, Candice Trocme, Nathalie Sturm, Marie-Noelle Hilleret, Francoise Morel, Jean-Pierre Zarski** (2004//). Circulating matrix metalloproteinases 1, 2, 9 and their inhibitors TIMP-1 and TIMP-2 as serum markers of liver fibrosis in patients with chronic hepatitis C: comparison with PIIINP and hyaluronic acid. *The American journal of gastroenterology*, 99(2), 271

**Violaine Eyraud, Olivier Chazouilleres, Eric Ballot, Christophe Corpechot, Raoul Poupon, Catherine Johanet** (2009//). Significance of antibodies to soluble liver antigen/liver pancreas: a large French study. *Liver international : official journal of the International Association for the Study of the Liver*, 29(6), 857

**Van der Poel C.L., Reesink H.W.** (1991//). The impact of hepatitis C virus to blood transfusion services *European Journal of Gastroenterology and Hepatology*, 3(8), 597

**Vassilaki N., Mavromara P.** (2009//). The HCV ARFP/F/Core+1 protein: Production and functional analysis of an unconventional viral product *IUBMB Life*, 61(7), 739

**Vockel A.** (2005//). Response from Abbott to the two previous articles *Journal of Clinical Virology*, 34(3), 216

**Vos S., van Rossum I., Burns L., Knol D., Scheltens P., Soinenen H., Wahlund L.-O., Hampel H., Tsolaki M., Minthon L., Handels R., L'Italien G., van der Flier W., Aalten P., Teunissen C., Barkhof F., Blennow K., Wolz R., Rueckert D., Verhey F., Visser P.J.** (2012//). Test sequence of CSF and MRI biomarkers for prediction of AD in subjects with MCI *Neurobiology of Aging*, 33(10), 2272

**Wahib A.A., el-Nasr M.S., Mangoud A.M., el-Shazly A.M., Morsy A.T.** (2006//). The liver profile in patients with hepatitis C virus and/or fascioliasis *Journal of the Egyptian Society of Parasitology*, 36(2), 405

**Wai C.-T., Fontana R.J.** (2004//). Clinical significance of hepatitis B virus genotypes, variants, and mutants *Clinics in Liver Disease*, 8(2), 321

**Wandtke T., Wozniak J., Kopinski P.** (2015//). Aptamers in diagnostics and treatment of viral infections *Viruses*, 7(2), 751

**Wang N.-Y., Zhang D., Zhao W., Fang G.-X., Shi Y.-L., Duan M.-H.** (2009//). Clinical application of an enzyme-linked immunosorbent assay detecting

hepatoma-specific gamma-glutamyltransferase *Hepatology Research*, 39(10), 979

**Wang W.-W., Ang S.F., Kumar R., Heah C., Utama A., Tania N.P., Li H., Tan S.H., Poo D., Choo S.P., Chow W.C., Tan C.K., Toh H.C.** (2013//). Identification of Serum Monocyte Chemoattractant Protein-1 and Prolactin as Potential Tumor Markers in Hepatocellular Carcinoma *PLoS ONE*, 8(7), no pagination

**Wang X., Norris J.L., Liu Y., Reilly K.H., Wang Dr. N.** (2012//). Health-related attitudes and risk factors for sexually transmitted infections of Chinese women who have sex with women *Chinese Medical Journal*, 125(16), 2819

**Wei L., Yang R.-F., Xie Q., Shang J., Kong F.-Y., Zhang H.-Y., Rao H.-Y., Jin Q., Cong X., Liu Y.-Y., Kang Y.** (2014//). Hepatitis C virus core antigen, an earlier and stronger predictor on sustained virological response in patients with genotype 1 HCV infection *BMC gastroenterology*, 14(#issue#), 47

**Weisbord J.S., Trepka M.J., Zhang G., Smith I.P., Brewer T.** (2003//). Prevalence of and risk factors for hepatitis C virus infection among STD clinic clientele in Miami, Florida *Sexually transmitted infections*, 79(1), E1

**Wiwanitkit V.** (2012//). Serological screening test as a tool for early prevention of cancerous disorders *Jundishapur Journal of Microbiology*, 5(4), 601

**Wolf F.H., Fuchs S.C., Brandao A.B.** (2011//). Absence of occult hepatitis B among blood donors in southern Brazil *Brazilian Journal of Infectious Diseases*, 15(2), 159

**Wong S.N., Campos J.R., Cua I.H.Y., Jamias J.D., Labio M.E.D., Tan J.L., Ong J.P., Salvana A.D., Go A.O., Payawal D.A.** (2015//). The 2014 hepatology society of the Philippines consensus statements on the diagnosis and treatment of hepatitis C *Phillippine Journal of Internal Medicine*, 53(1), 1

**Worman H.J.** (1997//). Molecular biological methods in diagnosis and treatment of liver diseases *Clinical Chemistry*, 43(8 SUPPL.), 1476

**Wozniakowska-Gesicka T., Zeman K., Wisniewska-Ligier M., Kups J., Puchala B., Glowacka E., Mixa D., Mixa A., Dworniak D.** (1998//). Serum levels of IL-1beta, IL-6, TNF-alpha and sTNFRp55 in children with chronic hepatitis C in respect to HCV genotype *International Review of Allergology and Clinical Immunology*, 4(2), 94

**W A Al-Kubaisy, K T Al-Naib, M Habib** (2006//). Seroprevalence of hepatitis C virus specific

antibodies among Iraqi children with thalassaemia. *Eastern Mediterranean health journal = La revue de sante de la Mediterranee orientale = al-Majallah al-s.ih.h.iyah li-sharq al-mutawassit.*, 12(1-2), 204

**W E Hitzler, S Runkel** (2001//). Routine HCV PCR screening of blood donations to identify early HCV infection in blood donors lacking antibodies to HCV. *Transfusion*, 41(3), 333

**W K Roth, M Weber, E Seifried** (1999//). Feasibility and efficacy of routine PCR screening of blood donations for hepatitis C virus, hepatitis B virus, and HIV-1 in a blood-bank setting. *Lancet (London, England)*, 353(9150), 359

**W L Irving, S Day, D Bennett, R P Eglin, P Flanagan, P Nuttall, V James** (1993//). Use of anti-GOR testing in the screening of blood donors for hepatitis C virus infection. *Vox sanguinis*, 65(1), 38

**W Prohaska, C Wolff, K Schluter, W Koster-Eiserfunke, M M Korner, K Kleesiek** (1992//). Immunoglobulin preparations from hepatitis C antibody-positive plasma donors: influence on diagnosis and risk of infection in heart transplant recipients. *The Clinical investigator*, 70(7), 573

**W Zhai, J Davies, D Z Shang, S W Chan, J P Allain** (1999//). Human recombinant single-chain antibody fragments, specific for the hypervariable region 1 of hepatitis C virus, from immune phage-display libraries. *Journal of viral hepatitis*, 6(2), 115

**Wen Wang, Lan-Juan Zhao, Yan Wang, Qing-Yuan Tao, Mark A Feitelson, Ping Zhao, Hao Ren, Zhong-Tian Qi** (2011//). Application of HBx-induced anti-URGs as early warning biomarker of cirrhosis and HCC. *Cancer biomarkers : section A of Disease markers*, 11(1), 29

**Wu-Shiung Huang, Sheng-Nan Lu, Jing-Houng Wang, Chuan-Mo Lee, Hung-Da Tung, Tsung-Ming Chen, Chi-Sin ChangChien** (2005//). Prediction of viremia for cases of hepatitis C virus (HCV) infection using a third-generation anti-HCV enzyme immunoassay test. *Hepato-gastroenterology*, 52(63), 893

**X De Lamballerie** (1996//). Serological and molecular biology screening techniques for HVC infection. *Nephrology, dialysis, transplantation : official publication of the European Dialysis and Transplant Association - European Renal Association*, 11 Suppl 4(#issue#), 9

**X Fornis, M D Maluenda, F X Lopez-Labrador, S Ampurdanes, E Olmedo, J Costa, P Simmonds, J M Sanchez-Tapias, M T Jimenez De Anta, J Rodes** (1996//). Comparative study of three methods for

genotyping hepatitis C virus strains in samples from Spanish patients. *Journal of clinical microbiology*, 34(10), 2516

**X Zavitsanos, A Hatzakis, E Kaklamani, A Tzonou, N Toupadaki, C Broeksma, J Chrispeels, H Troonen, S Hadziyannis, C C Hsieh** (1992//). Association between hepatitis C virus and hepatocellular carcinoma using assays based on structural and nonstructural hepatitis C virus peptides. *Cancer research*, 52(19), 5364

**Xiao-Min Xin, Gui-Qiu Li, Ying-Yu Jin, Min Zhuang, Di Li** (2008//). Combination of small interfering RNAs mediates greater suppression on hepatitis B virus cccDNA in HepG2.2.15 cells. *World journal of gastroenterology*, 14(24), 3849

**Xin Lu, Min Yao, Jian-Min Zhang, Jing Yang, Ying-Feng Lei, Xiao-Jun Huang, Zhan-Sheng Jia, Li Ma, Hai-Yun Lan, Zhi-Kai Xu, Wen Yin** (2014//). Identification of peptides that bind hepatitis C virus envelope protein E2 and inhibit viral cellular entry from a phage-display peptide library. *International journal of molecular medicine*, 33(5), 1312

**Xin-Xin Zhang, Qiang Deng, Shen-Ying Zhang, Jing Liu, Qian Cai, Zhi-Meng Lu, Yuan Wang** (2003//). Broadly cross-reactive mimotope of hypervariable region 1 of hepatitis C virus derived from DNA shuffling and screened by phage display library. *Journal of medical virology*, 71(4), 511

**Xiuying Liu, Xiumei Chi, Qiaoling Gong, Lei Gao, Yuqiang Niu, Xiaojing Chi, Min Cheng, Youhui Si, Maorong Wang, Jin Zhong, Junqi Niu, Wei Yang** (2015//). Association of serum level of growth differentiation factor 15 with liver cirrhosis and hepatocellular carcinoma. *PLoS one*, 10(5), e0127518

**Xiao X., Zhai J., Zeng J., Tian C., Wu H., Yu Y.** (2013//). Comparative evaluation of a triplex nucleic acid test for detection of HBV DNA, HCV RNA, and HIV-1 RNA, with the Procleix Tigris System *Journal of Virological Methods*, 187(2), 357

**Yamasaki Y., Narain S., Hernandez L., Barker T., Ikeda K., Segal M.S., Richards H.B., Chan E.K., Reeves W.H., Satoh M.** (2006//). Autoantibodies against the replication protein A complex in systemic lupus erythematosus and other autoimmune diseases *Arthritis research & therapy*, 8(4), R111

**Yan J., Dennin R.H.** (2000//). A high frequency of GBV - C/HGV coinfection in hepatitis C patients in Germany *World Journal of Gastroenterology*, 6(6), 833

**Yang G., Vyas G.N.** (1996//). Immunodiagnosis of



viral hepatitis A to E and non-A to -E *Clinical and Diagnostic Laboratory Immunology*, 3(3), 247

**Yang J., Ji S., Zhang Y., Wang J.** (2013//). Helicobacter hepaticus infection in primary hepatocellular carcinoma tissue *Singapore Medical Journal*, 54(8), 451

**Yang Y.P., Liu C.B., Jin D.Y., Zhan M.Y., Tang Q., Xia N.S., Cao J.Y., Li J.Y.** (1994//). cDNA cloning of c33-c antigen gene derived from NS3 region of Chinese HCV genome, expression in Escherichia coli and development of HCV EIA second-generation diagnostic kit *Science in China. Series B, Chemistry, life sciences & earth sciences*, 37(2), 190

**Yao C., Fu Q., Xiao W.H., Dong W., Yi Y.L.** (1993//). Detection of HCV infection by cPCR in patients with acute leukemia *Chinese medical journal*, 106(9), 647

**Yao P., Hu X., Hu D.** (2000//). Study of hepatitis C virus specific immune responses in anti-HCV positive patients without hepatitis C viremia *Zhonghua shi yan he lin chuang bing du xue za zhi = Zhonghua shiyan he linchuang bingduxue zazhi = Chinese journal of experimental and clinical virology*, 14(3), 227

**Yilmaz A., Alagozlu H., Ozdemir O., Arici S.** (2014//). Effects of the Chemokine receptor 5 (CCR5)-delta32 mutation on hepatitis C virus-specific immune responses and liver tissue pathology in HCV infected patients *Hepatitis Monthly*, 14(7), no pagination

**Yoshida C.F., Takahashi Y., Vanderborght B.O., Rouzere C.D., Franca M.S., Takahashi C., Takamizawa A., Yoshida I., Schatzmayr H.G.** (1993//). Antibodies against non-structural c100/3 and structural core antigen of hepatitis C virus (HCV) in hemodialysis patients *Revista do Instituto de Medicina Tropical de Sao Paulo*, 35(4), 315

**Yoshida H., Ishikawa H., Honda S., Miura Y., Ogata M.** (1992//). False positive reaction of heat-inactivated sera in enzyme-linked immunosorbent assay for antibody to hepatitis C virus *Fukushima journal of medical science*, 38(1), 35

**Yoshikawa A., Gotanda Y., Itabashi M., Minegishi K., Kanemitsu K., Nishioka K.** (2005//). Hepatitis B NAT virus-positive blood donors in the early and late stages of HBV infection: Analyses of the window period and kinetics of HBV DNA *Vox Sanguinis*, 88(2), 77

**Yuk C.S., Lee H.K., Kim H.T., Choi Y.K., Lee B.C., Chun B.H., Chung N.** (2004//). Development and evaluation of a protein microarray chip for

diagnosis of hepatitis C virus *Biotechnology letters*, 26(20), 1563

**Yunomura K., Sugaya H., Harada T., Tsuda F., Okamoto H.** (1994//). Type-specific antibodies to hepatitis C virus in patients with chronic hepatitis C for predicting response to interferon alfa *International Hepatology Communications*, 2(4), 201

**Y Akahane, M Kojima, Y Sugai, M Sakamoto, Y Miyazaki, T Tanaka, F Tsuda, S Mishiro, H Okamoto, Y Miyakawa, M Mayumi** (1994//). Hepatitis C virus infection in spouses of patients with type C chronic liver disease. *Annals of internal medicine*, 120(9), 748

**Y Bayraktar, M Bayraktar, A Gurakar, T I Hassanein, D H Van Thiel** (1997//). A comparison of the prevalence of autoantibodies in individuals with chronic hepatitis C and those with autoimmune hepatitis: the role of interferon in the development of autoimmune diseases. *Hepato-gastroenterology*, 44(14), 417

**Y Lazizi, E Elfassi, J Pillot** (1992//). Detection of hepatitis C virus sequences in sera with controversial serology by nested polymerase chain reaction. *Journal of clinical microbiology*, 30(4), 931

**Y Nakamoto, S Kaneko, H Ohno, M Honda, M Unoura, S Murakami, K Kobayashi** (1996//). B-cell epitopes in hypervariable region 1 of hepatitis C virus obtained from patients with chronic persistent hepatitis. *Journal of medical virology*, 50(1), 35

**Y Suzuki, C Matsumoto, J Watanabe, N Yahagi, K Nishioka** (1993//). Low temperature dependent IgG3 subclass antibody with low avidity to C100-3 antigen derived from hepatitis C virus in voluntary blood donors. *Japanese journal of medical science & biology*, 46(2), 57

**Y Watanabe, S Harada, I Saito, T Miyamura** (1991//). Prevalence of antibody against the core protein of hepatitis C virus in patients with hepatocellular carcinoma. *International journal of cancer*, 48(3), 340

**Yalena Amador-Canizares, Liz Alvarez-Lajonchere, Ivis Guerra, Ingrid Rodriguez-Alonso, Gillian Martinez-Donato, Julian Triana, Eddy E Gonzalez-Horta, Angel Perez, Santiago Duenas-Carrera** (2008//). Induction of IgA and sustained deficiency of cell proliferative response in chronic hepatitis C. *World journal of gastroenterology*, 14(44), 6844

**Yan-Shen Shan, Yu-Hsiang Hsieh, Pin-Wen Lin**

(2007//). Telomerase activity in tumor and remnant liver as predictor of recurrence and survival in hepatocellular carcinoma after resection. *World journal of surgery*, 31(5), 1121

**Yan-Wei Zhong, Jun Cheng, Gang Wang, Shuang-Shuang Shi, Li Li, Ling-Xia Zhang, Ju-Mei Chen** (2002//). Preparation of human single chain Fv antibody against hepatitis C virus E2 protein and its identification in immunohistochemistry. *World journal of gastroenterology*, 8(5), 863

**Yasunobu Fukuda, Hiroshi Yotsuyanagi, Seido Ooka, Taichi Sekine, Junki Koike, Toshifumi Takano, Michihiro Suzuki, Fumio Itoh, Kusuki Nishioka, Tomohiro Kato** (2004//). Identification of a new autoantibody in patients with chronic hepatitis. *Human immunology*, 65(12), 1530

**Yi-Wei Tang, Haijing Li, Ann Roberto, Diane Warner, Belinda Yen-Lieberman** (2004//). Detection of hepatitis C virus by a user-developed reverse transcriptase-PCR and use of amplification products for subsequent genotyping. *Journal of clinical virology : the official publication of the Pan American Society for Clinical Virology*, 31(2), 148

**Yinon Shapira, Nancy Agmon-Levin, Yves Renaudineau, Bat Sheva Porat-Katz, Ori Barzilai, Maya Ram, Pierre Youinou, Yehuda Shoenfeld** (2012//). Serum markers of infections in patients with primary biliary cirrhosis: evidence of infection burden. *Experimental and molecular pathology*, 93(3), 386

**Yoann Morice, Maxime Ratinier, Ahmed Miladi, Stephane Chevaliez, Georgios Germanidis, Heiner Wedemeyer, Syria Laperche, Jean-Pierre Lavergne, Jean-Michel Pawlotsky** (2009//). Seroconversion to hepatitis C virus alternate reading frame protein during acute infection. *Hepatology (Baltimore, Md.)*, 49(5), 1449

**Yoichi Hiasa, Jason T Blackard, Wenyu Lin, Yoshitaka Kamegaya, Norio Horiike, Morikazu Onji, Emmett V Schmidt, Raymond T Chung** (2006//). Cell-based models of sustained, interferon-sensitive hepatitis C virus genotype 1 replication. *Journal of virological methods*, 132(1-2), 195

**Yong Zhou, Shao-Duo Yan, Shuai-Zheng Jia, Hai-Ping Wang, Qiu-Xia Fu, Juan Du, Xiao-Hui Wang, Sheng-Qiang Liang, Jin-Gang Zhang, Lin-Sheng Zhan** (2012//). Noninvasive molecular imaging of interferon beta activation in mouse liver. *Liver international : official journal of the International Association for the Study of the Liver*, 32(3), 383

**Yuan Tian, Heng-Hui Zhang, Lai Wei, Shao-Cai Du, Hong-Song Chen, Ran Fei, Feng Liu** (2007//).

The functional evaluation of dendritic cell vaccines based on different hepatitis C virus nonstructural genes. *Viral immunology*, 20(4), 553

**Yukari Takao, Akira Yamada, Shigeru Yutani, Hiroko Takedatsu, Takeharu Ono, Kojyu Etoh, Yi Wang, Susumu Suzuki, Tatsuya Ide, Kunitada Shimotohno, Michio Sata, Kyogo Itoh** (2007//). Identification of new immunogenic peptides in conserved regions of hepatitis C virus (HCV) 1b with the potentiality to generate cytotoxic T lymphocytes in HCV1b(+) HLA-A24(+) patients. *Hepatology research : the official journal of the Japan Society of Hepatology*, 37(3), 186

**Yukiko Kanno, Hiroshi Watanabe, Atsushi Takahashi, Kazumichi Abe, Hiromasa Ohira** (2014//). Anti-phosphoenolpyruvate carboxylase 2 antibody in patients with autoimmune hepatitis. *Hepatology research : the official journal of the Japan Society of Hepatology*, 44(9), 1019

**Yun Zhou, Futao Zhao, Lin Chen, Li Ma, Yu Wang, Yu He, Zhiyuan Ma, Haili Liu, Yonghong Guo, Ying Zhang, Zhiqiang Yao, Chunqiu Hao, Zhansheng Jia** (2013//). Development of a dendritic cell vaccine encoding multiple cytotoxic T lymphocyte epitopes targeting hepatitis C virus. *International journal of molecular medicine*, 32(4), 901

**Yves Riviere, Thomas Montange, Genevieve Janvier, Caroline Marnata, Ludovic Durrieu, Marie-Laure Chaix, Maria Isagulians, Odile Launay, Jean-Louis Bresson, Stanislas Pol** (2012//). Hepatitis C virus-specific cellular immune responses in individuals with no evidence of infection. *Virology journal*, 9(#issue#), 76

**Z Amoura, S Koutouzov, H Chabre, P Cacoub, I Amoura, L Musset, J F Bach, J C Piette** (2000//). Presence of antinucleosome autoantibodies in a restricted set of connective tissue diseases: antinucleosome antibodies of the IgG3 subclass are markers of renal pathogenicity in systemic lupus erythematosus. *Arthritis and rheumatism*, 43(1), 76

**Z M Sthoeger, M Fogel, A Smirov, D Ergas, Y Lurie, D D Bass, D Geltner, S D Malnick** (2000//). Anticardiolipin autoantibodies in serum samples and cryoglobulins of patients with chronic hepatitis C infection. *Annals of the rheumatic diseases*, 59(6), 483

**Z X Zhang, Z B Yun, M Chen, A Sonnerborg, M Sallberg** (1995//). Evaluation of a multiple peptide assay for typing of antibodies to the hepatitis C virus: relation to genomic typing by the polymerase chain reaction. *Journal of medical virology*, 45(1), 50

- Z Y Zhu, O Minenkova, F Bellintani, A De Tomassi, L Urbanelli, F Felici, P Monaci** (2000//). 'In vitro evolution' of ligands for HCV-specific serum antibodies. *Biological chemistry*, 381(3), 245
- Zaccheaus A Jeremiah, Halima Idris, Babajide B Ajayi, Anthony C U Ezimah, Mohammed B Malah, Maryceline M Baba** (2011//). Isolated anti-HBc-IgM antibody among blood donors in the semi-arid region of Nigeria. *Human antibodies*, 20(3-4), 77
- Zhejia Zhang, Linyong Xu, Zhiming Wang** (2011//). Screening serum biomarkers for early primary hepatocellular carcinoma using a phage display technique. *Journal of clinical laboratory analysis*, 25(6), 402
- Zhigang Hu, Mei Li, Jie Liu, Lei Yu, Yifeng Xue, Yu Chen** (2015//). Detection of Hepatitis B Virus Large Surface Protein Using a Time-Resolved Immunofluorometric Assay. *Journal of clinical laboratory analysis*, 29(6), 498
- Zhongsheng Guo, Henghui Zhang, Huiying Rao, Dong Jiang, Xu Cong, Bo Feng, Jianghua Wang, Lai Wei, Hongsong Chen** (2012//). DCs pulsed with novel HLA-A2-restricted CTL epitopes against hepatitis C virus induced a broadly reactive anti-HCV-specific T lymphocyte response. *PLoS one*, 7(6), e38390
- Zoltan Lukacs, Alexandra Dietrich, Rainer Ganschow, Alfred Kohlschutter, Rudolf Kruithof** (2005//). Simultaneous determination of HIV antibodies, hepatitis C antibodies, and hepatitis B antigens in dried blood spots--a feasibility study using a multi-analyte immunoassay. *Clinical chemistry and laboratory medicine*, 43(2), 141
- of the Saudi Center for Organ Transplantation, Saudi Arabia**, 25(6), 1315
- //). The cost-effectiveness of screening and treatment for hepatitis C in prisons in England and Wales: A cost-utility analysis *Journal of Viral Hepatitis*, 15(11), 797
- Zaman A., Rosen H.R., Ingram K., Corless C.L., Oh E., Smith K.** (2007//). Assessment of FIBROspectrum II to Detect Hepatic Fibrosis in Chronic Hepatitis C Patients *American Journal of Medicine*, 120(3), 280
- Zekri A.-R., Youssef A.S.E.-D., Bakr Y.M., Gabr R.M., El-Rouby M.N.E.-D., Hammad I., Ahmed E.A.E.-M., Marzouk H.A.E.-H., Nabil M.M., Hamed H.A.E.-H., Aly Y.H., Zachariah K.S., Esmat G.** (2015//). Serum biomarkers for early detection of hepatocellular carcinoma associated with HCV infection in Egyptian patients *Asian Pacific journal of cancer prevention : APJCP*, 16(3), 1281
- Zekri A.-R.N., Bahnassy A.A., El-Din H.M.A., Morsy H.M., Shaarawy S., Moharram N.Z., Daoud S.S.** (2011//). Serum levels of beta-catenin as a potential marker for genotype 4/hepatitis C-associated hepatocellular carcinoma *Oncology Reports*, 26(4), 825
- Zekri A.-R.N., Bahnassy A.A., Khaled H.M., Mansour O., Attia M.A.** (1995//). Comparative analysis of different PCR techniques for detection of HCV in hepatocellular carcinoma patients *Cancer Journal*, 8(6), 331
- Zervou E.K., Boumba D.S., Liaskos Ch., Georgiadou S., Tsianos E.V., Dalekos G.N.** (2003//). Low prevalence of HCV, HIV, and HTLV-I/II infection markers in northwestern Greece: Results of a 3-year prospective donor study (1995-1997) *European Journal of Internal Medicine*, 14(1), 39
- Zhang H.-Q., Li S.-B., Wang G.-H., Chen K., Song X.-G., Feng X.-Y.** (2007//). Detection of hepatitis C virus core antigen for early diagnosis of hepatitis C virus infection in plasma donor in China *World Journal of Gastroenterology*, 13(19), 2738
- Zhang K., Wang L., Sun Y., Zhang R., Lin G., Xie J., Li J.** (2014//). Improving the safety of blood transfusion by using a combination of two screening assays for hepatitis C virus *Transfusion medicine (Oxford, England)*, 24(5), 297
- Zhang W., Dong S.-F., Sun S.-H., Wang Y., Li G.-D., Qu D.** (2006//). Coimmunization with IL-15 plasmid enhances the longevity of CD8 T cells induced by DNA encoding hepatitis B virus core antigen *World Journal of Gastroenterology*, 12(29), 4727
- Zhang W., Huang J., Zhou M.F., Chen L.Y., Ding Y.P., Cao H.J., Geng Y.Y., Wang S.Q.** (2005//). Protein chip for detection of different HCV antibodies: preparation, quality control, and clinical evaluation *Molecular diagnosis : a journal devoted to the understanding of human disease through the clinical application of molecular biology*, 9(2), 81
- Zhao L.-J., Zhang X.-L., Zhao P., Cao J., Cao M.-M., Zhu S.-Y., Liu H.-Q., Qi Z.-T.** (2006//). Up-regulation of ERK and p38 MAPK signaling pathways by hepatitis C virus E2 envelope protein in human T lymphoma cell line *Journal of Leukocyte Biology*, 80(2), 424
- Zhao Q., Dennin R.H.** (1993//). Investigations on the selection of primers suitable for reverse transcription and polymerase chain reaction in hepatitis C (HCV) diagnosis, and correlation to the

anti-HCV status *Klinisches Labor*, 39(9), 637

**Zhevachevsky N.G., Nomokonova N.Yu., Beklemishev A.B., Belov G.F.** (2000//). Dynamic study of HBsAg and HBeAg in saliva samples from patients with hepatitis B infection: Diagnostic and epidemiological significance *Journal of Medical Virology*, 61(4), 433

**Zibert A., Dudziak P., Schreier E., Roggendorf M.** (1997//). Characterization of antibody response to hepatitis C virus protein E2 and significance of hypervariable region 1-specific antibodies in viral neutralization *Archives of Virology*, 142(3), 523

## 2. What TYPE OF PUBLICATION is it?

**J P Allain** (1998//). The status of hepatitis C virus screening. *Transfusion medicine reviews*, 12(1), 46

**Janot C.** (1994//). ELISA kits for detection of anti-HCV antibodies. "Viral Hepatitis" Working Group of the French Society of Blood Transfusion *Transfusion clinique et biologique : journal de la Societe francaise de transfusion sanguine*, 1(1), 47

**Lambert N.** (2007//). Value of HCV antigen-antibody combined HCV assay in hepatitis C diagnosis *Advances in Transfusion Safety Volume IV, Developments in Biologicals*, 127(#issue#), 113

**Neelam Marwaha, Suchet Sachdev** (2014//). Current testing strategies for hepatitis C virus infection in blood donors and the way forward. *World journal of gastroenterology*, 20(11), 2948

**Nelson K.E., Shan H.** (2008//). Confirmatory testing of hepatitis C virus-positive enzyme immunoassay results in limited-resource countries: Should it be attempted? *Transfusion*, 48(6), 1239

**Roberio Amorim de Almeida Ponde** (2013//). Enzyme-linked immunosorbent/chemiluminescence assays, recombinant immunoblot assays and nucleic acid tests in the diagnosis of HCV infection. *European journal of clinical microbiology & infectious diseases : official publication of the European Society of Clinical Microbiology*, 32(8), 985

## 3. Is the STUDY POPULATION comprised of asymptomatic, non-pregnant adults (aged 18+ years) with unknown liver enzyme values at average risk of HCV infection?

**Alexandru S., Antipa C., Ionescu R., Tanasescu C.** (1998//). Comparison between reverse

transcription-polymerase chain reaction and immune enzyme assays in the diagnosis of hepatitis C virus infection *Romanian journal of internal medicine = Revue roumaine de medecine interne*, 36(1-2), 57

**Ali A., Lal A.** (2010//). False positivity of serological tests for hepatitis C virus *Journal of Ayub Medical College, Abbottabad : JAMC*, 22(2), 43

**A Da Porto, P Poli, P Calzavara, M R Castelletto, A Adami, C Cascone, G P Amici, T Teodori, L Okolicsanyi** (1992//). Comparison between first- and second-generation test for anti-hepatitis C virus antibodies in hemodialysis patients. *Nephron*, 61(3), 367

**A K Reddy, K V Dakshinamurty, V Lakshmi** (2006//). Utility of HCV core antigen ELISA in the screening for hepatitis C virus infection in patients on hemodialysis. *Indian journal of medical microbiology*, 24(1), 55

**A Schnuriger, S Dominguez, M-A Valantin, R Tubiana, C Duvivier, J Ghosn, A Simon, C Katlama, V Thibault** (2006//). [Early detection of hepatitis C virus infection using a new combined antigen-antibody detection assay: potential use in HIV co-infected individuals]. *Pathologie-biologie*, 54(10), 578

**A Widell, A S Mansson, G Sundstrom, B G Hansson, E Nordenfelt** (1991//). Hepatitis C virus RNA in blood donor sera detected by the polymerase chain reaction: comparison with supplementary hepatitis C antibody assays. *Journal of medical virology*, 35(4), 253

**Alexandre Macedo de Oliveira, Kathryn L White, Brady D Beecham, Dennis P Leschinsky, Brett P Foley, Janel Dockter, Cristina Giachetti, Thomas J Safranek** (2006//). Sensitivity of second-generation enzyme immunoassay for detection of hepatitis C virus infection among oncology patients. *Journal of clinical virology : the official publication of the Pan American Society for Clinical Virology*, 35(1), 21

**Ana M Contreras, Claudia M Tornero-Romo, Jose G Toribio, Alfredo Celis, Axel Orozco-Hernandez, P Kristian Rivera, Claudia Mendez, M Isabel Hernandez-Lugo, Laura Olivares, Martha A Alvarado** (2008//). Very low hepatitis C antibody levels predict false-positive results and avoid supplemental testing. *Transfusion*, 48(12), 2540

**B J Pereira, T L Wright, C H Schmid, C F Bryan, R C Cheung, E S Cooper, H Hsu, R Heyn-Lamb, J A Light, D J Norman** (1994//). Screening and confirmatory testing of cadaver organ donors for

hepatitis C virus infection: a U.S. National Collaborative Study. *Kidney international*, 46(3), 886

**Busch M.P., Tobler L.H., Tegtmeier G., Polito A., Quan S., Hirschler N.V., Dockter J., Giachetti C., Mimms L.** (2000//). Use of third-generation hepatitis C virus (HCV) enzyme immunoassay (EIA) to resolve second-generation HCV EIA-reactive and second-generation recombinant immunoblot assay-indeterminate blood samples: Data to support current food and drug administration guidance on HCV lookback *Transfusion*, 40(1), 10

**Cecille A., Wendling M.J., Panabieres O., Gut J.P.** (1999//). Retrospective study of RIBA-3 pattern in 68 patients with controversial results by third-generation hepatitis C virus ELISA assays *Pathologie Biologie*, 47(5), 508

**Contreras A.M., Tinoco E., Celis A., Novelo B., Romero M.V.P., Carrada E., Jimenez-Mendez R., Morales A.B., Garcia I.O., Rodriguez Carbajal O., Hernandez Lugo M.I., Olivares L.P., Gonzalez C.R., Hernandez S.R., Mercado Suarez M.F., Martinez Perry S., Herrera Aguilar J., Amaton R., Lopez Arroyo J.L., Aguirre Aguirre I.J., Garcia Ramos V.H., Gonzalez Santos M.A., Juarez Terrazas J.L., Gutierrez Almanza J., Rivas M.V., Herrera G.C., Del Rio L.T.V., Miranda J.R., Vargas Maldonado T.M., Mariscal C.G., Malagon A., Del Carmen Mavil Lara L., Barbosa R., De Jesus Pichardo M., De Lourdes Pandura R., Palomares B., Chongo Alfaro M.L.** (2007//). Hepatitis C antibody intraassay correlation: Is retest in duplicate necessary? *Transfusion*, 47(9), 1686

**Caroline E Mullis, Oliver Laeyendecker, Steven J Reynolds, Ponsiano Ocama, Jeffrey Quinn, Iga Boaz, Ronald H Gray, Gregory D Kirk, David L Thomas, Thomas C Quinn, Lara Stabinski** (2013//). High frequency of false-positive hepatitis C virus enzyme-linked immunosorbent assay in Rakai, Uganda. *Clinical infectious diseases : an official publication of the Infectious Diseases Society of America*, 57(12), 1747

**Catherine Gaudy, Catherine Thevenas, Jean Tichet, Nicole Mariotte, Alain Goudeau, Frederic Dubois** (2005//). Usefulness of the hepatitis C virus core antigen assay for screening of a population undergoing routine medical checkup. *Journal of clinical microbiology*, 43(4), 1722

**D Bresters, H T Cuypers, H W Reesink, W P Schaasberg, C L van der Poel, E P Mauser-Bunschoten, M Houghton, Q L Choo, G Kuo, R Lesniewski** (1992//). Enhanced sensitivity of a second generation ELISA for antibody to hepatitis C virus. *Vox sanguinis*, 62(4), 213

**D Robert Dufour, Mageli Talastas, Maria D A Fernandez, Barbara Harris, Doris B Strader, Leonard B Seeff** (2003//). Low-positive anti-hepatitis C virus enzyme immunoassay results: an important predictor of low likelihood of hepatitis C infection. *Clinical chemistry*, 49(3), 479

**D Y Chien, P Arcangel, A Medina-Selby, D Coit, M Baumeister, S Nguyen, C George-Nascimento, A Gyenes, G Kuo, P Valenzuela** (1999//). Use of a novel hepatitis C virus (HCV) major-epitope chimeric polypeptide for diagnosis of HCV infection. *Journal of clinical microbiology*, 37(5), 1393

**Dalekos G.N., Zervou E.K., Bouba D.S., Tsianos E.V.** (1996//). Frequency of viraemia due to hepatitis C virus among individuals with indeterminate results after RIBA-II HCV test. A preliminary study *Hellenic Journal of Gastroenterology*, 9(2), 160

**E Kocabas, N Aksaray, E Alhan, A Tanyeli, F Koksall, F Yarkin** (1997//). Hepatitis B and C virus infections in Turkish children with cancer. *European journal of epidemiology*, 13(8), 869

**F G Gabriel, C G Teo** (1994//). Peptide based enzyme immunoassays for detecting hepatitis C antibodies in sera of people at high risk. *Journal of clinical pathology*, 47(4), 357

**Francois Rouet, Luc Deleplancque, Berthold Bivigou Mboumba, Jeanne Sica, Augustin Mouinga-Ondeme, Florian Liegeois, Alain Goudeau, Frederic Dubois, Catherine Gaudy-Graffin** (2015//). Usefulness of a fourth generation ELISA assay for the reliable identification of HCV infection in HIV-positive adults from Gabon (Central Africa). *PloS one*, 10(1), e0116975

**Fu-Rong Ren, Qiu-Shuang Lv, Hui Zhuang, Jing-Jing Li, Xiao-Yan Gong, Guo-Jing Gao, Chang-Li Liu, Jing-Xing Wang, Fu-Zhu Yao, You-Rong Zheng, Fa-Ming Zhu, Mei-Hei-Li Tiemuer, Xu-Hua Bai, Hua Shan** (2005//). Significance of the signal-to-cutoff ratios of anti-hepatitis C virus enzyme immunoassays in screening of Chinese blood donors. *Transfusion*, 45(11), 1816

**Fabrizi F., Raffaele I., Guarnori I., Bacchini G., Marai P., Erba G., Locatelli F.** (1995//). Comparison of second-generation screening and confirmatory assays with recombinant antigens and synthetic peptides against antibodies to hepatitis C virus: A study in penal patients *Nephron*, 69(4), 444

**Fierz W.** (1997//). Serologic testing for HBsAg, hepatitis C and HIV 1 and 2 using the COBAS core II immunochemistry analyser *Clinical Laboratory*,

**Filice G., Patruno S., Campisi D., Chiesa A., Orsolini P., Debiaggi M., Bruno R., Tinelli M.** (1993//). Specificity and sensitivity of 3rd generation EIA for detection of HCV antibodies among intravenous drug-users *The new microbiologica : official journal of the Italian Society for Medical, Odontoiatric, and Clinical Microbiology (SIMMOC)*, 16(1), 35

**G E Abdelnour, G M Matar, H M Sharara, A M Abdelnoor** (1997//). Detection of anti-hepatitis C-virus antibodies and hepatitis C-virus RNA in Lebanese hemodialysis patients. *European journal of epidemiology*, 13(8), 863

**G J Kotwal, B M Baroudy, I K Kuramoto, F F McDonald, G M Schiff, P V Holland, J B Zeldis** (1992//). Detection of acute hepatitis C virus infection by ELISA using a synthetic peptide comprising a structural epitope. *Proceedings of the National Academy of Sciences of the United States of America*, 89(10), 4486

**Hussein M.M., Mooij J.M., Hegazy M.S., Bamaga M.S.** (2007//). The impact of polymerase chain reaction assays for the detection of hepatitis C virus infection in a hemodialysis unit *Saudi journal of kidney diseases and transplantation : an official publication of the Saudi Center for Organ Transplantation, Saudi Arabia*, 18(1), 107

**H B Krarup, S E Jacobsen, K Varming, A M Drewes, P H Madsen** (1998//). Performance of hepatitis C virus (HCV) antibody test systems in relation to HCV-RNA detection in the diagnosis of HCV infection. *Danish medical bulletin*, 45(1), 89

**H Maniwa, Y Miyake, T Oda, R Li, T Yokoyama, K Sugiyama** (1997//). Second generation hepatitis C virus antibody-positive rate in children: investigation of the route of hepatitis C virus infection in children with no history of transfusion. *Acta paediatrica Japonica; Overseas edition*, 39(5), 550

**H Vrielink, C L van der Poel, H W Reesink, P N Lelie** (1995//). Comparison of two anti-hepatitis C virus enzyme-linked immunosorbent assays: Wellcozyme VK45 and Ortho 2.0. *Infusionstherapie und Transfusionsmedizin*, 22(3), 164

**Hao-Hsi Kao, Kuo-Su Chen, Chih-Lang Lin, Jia-Jang Chang, Chien-Hung Lee** (2015//). Utilization of Signal-to-Cutoff Ratio of Hepatitis C Virus Antibody Assay in Predicting HCV Viremia among Hemodialysis Patients. *Nephron*, 130(2), 127

**Helge Myrnel, Vasanthan Navaratnam, Birgitta Asjo** (2005//). Detection of antibodies to hepatitis C virus: false-negative results in an automated chemiluminescent microparticle immunoassay

(ARCHITECT Anti-HCV) compared to a microparticle enzyme immunoassay (AxSYM HCV Version 3.0). *Journal of clinical virology : the official publication of the Pan American Society for Clinical Virology*, 34(3), 211

**J Ding, T Akira, Y Noriko, T Mikihiro, D Takayasu** (1998//). Study of hepatitis C virus genotype in Guizhou area of southwestern China. *Chinese medical journal*, 111(2), 128

**J M Pawlotsky, I Lonjon, C Hezode, B Raynard, F Darthuy, J Remire, C J Soussy, D Dhumeaux** (1998//). What strategy should be used for diagnosis of hepatitis C virus infection in clinical laboratories?. *Hepatology (Baltimore, Md.)*, 27(6), 1700

**J T Wang, T H Wang, J C Sheu, S J Tsai, Y S Hsieh, D T Lin, C Y Wang, D S Chen** (1993//). Hepatitis C virus infection in volunteer blood donors in Taiwan. Evaluation by hepatitis C antibody assays and the polymerase chain reaction. *Archives of pathology & laboratory medicine*, 117(2), 152

**Jeannette M Watterson, Paulina Stallcup, David Escamilla, Patrick Chernay, Alfred Reyes, Sylvia C Trevino** (2007//). Evaluation of the Ortho-Clinical Diagnostics Vitros ECi Anti-HCV test: comparison with three other methods. *Journal of clinical laboratory analysis*, 21(3), 162

**Jose M Echevarria, Ana Avellon, Gesa Jonas, Michael Hausmann, Angela Vockel, Hans-Peter Kapprell** (2006//). Sensitivity of a modified version of the ARCHITECT Anti-HCV test in detecting samples with immunoblot-confirmed, low-level antibody to hepatitis C virus. *Journal of clinical virology : the official publication of the Pan American Society for Clinical Virology*, 35(4), 368

**Juan I Esteban, Josef van Helden, Flora Alborino, Philippe Burgisser, Cristina Cellerai, Giuseppe Pantaleo, Adolfo Eiras, Maria I Rodriguez, Valeria Ghisetti, Michael Gleich, Roland Imdahl, Claudia Kaiser, Petra Moller, Olaf Wetlitzky, Manuel Segovia, Harald Schennach, Annelies Muhlbacher** (2013//). Multicenter evaluation of the Elecsys anti-HCV II assay for the diagnosis of hepatitis C virus infection. *Journal of medical virology*, 85(8), 1362

**Janot C., Courouce A.M., Barin F., Lunel-Fabiani F., Trepo C., Botte C.** (1994//). Screening tests of anti-HVC antibodies used in France. Analysis of sensitivity *Transfusion clinique et biologique : journal de la Societe francaise de transfusion sanguine*, 1(4), 295

**Kim Y.S., Lee H.S., Ahn Y.O.** (1999//). Factors associated with positive predictability of the anti-

HCV ELISA method with confirmatory RT-PCR  
*Journal of Korean medical science*, 14(6), 629

**King S., Adjei-Asante K., Appiah L., Adinku D., Beloukas A., Atkins M., Sarfo S.F., Chadwick D., Phillips R.O., Geretti A.M.** (2015//). Antibody screening tests variably overestimate the prevalence of hepatitis C virus infection among HIV-infected adults in Ghana *Journal of Viral Hepatitis*, 22(5), 461

**Kaori Morota, Ryo Fujinami, Hideki Kinukawa, Taiji Machida, Kenichi Ohno, Haruhisa Saegusa, Katsumichi Takeda** (2009//). A new sensitive and automated chemiluminescent microparticle immunoassay for quantitative determination of hepatitis C virus core antigen. *Journal of virological methods*, 157(1), 8

**Liu D., Steele J., Lloyd Jones S., Leslie D., Pedersen J., Baird R.** (1996//). Comparative evaluation of Abbott and Murex antibody assays and Roche Amplicor PCR for diagnosis of human hepatitis C *Serodiagnosis and Immunotherapy in Infectious Disease*, 8(2), 121

**L Mazzotta, G Landucci, L Pfanner, A Carlini, D Angelini, R Giusti, A Antonelli** (1992//). Comparison between first and second generation tests to determine the frequency of anti-HCV antibodies in uremic patients in replacement dialytic therapy. *Nephron*, 61(3), 354

**M Beld, M Penning, M van Putten, V Lukashov, A van den Hoek, M McMorrow, J Goudsmit** (1999//). Quantitative antibody responses to structural (Core) and nonstructural (NS3, NS4, and NS5) hepatitis C virus proteins among seroconverting injecting drug users: impact of epitope variation and relationship to detection of HCV RNA in blood. *Hepatology (Baltimore, Md.)*, 29(4), 1288

**M de Medina, C Ortiz, C Krenc, J Leete, D Vallari, M Hill, S LaRue, M Jimenez, W Anderson, E Schiff** (1992//). Improved detection of antibodies to hepatitis C virus in dialysis patients using a second-generation enzyme immunoassay. *American journal of kidney diseases : the official journal of the National Kidney Foundation*, 20(6), 589

**M Schroter, P Schafer, B Zollner, S Polywka, R Laufs, H H Feucht** (2001//). Strategies for reliable diagnosis of hepatitis C infection: the need for a serological confirmatory assay. *Journal of medical virology*, 64(3), 320

**Marcel Miedouge, Karine Saune, Nassim Kamar, Martine Rieu, Lionel Rostaing, Jacques Izopet** (2010//). Analytical evaluation of HCV core antigen and interest for HCV screening in haemodialysis patients. *Journal of clinical virology : the official*

*publication of the Pan American Society for Clinical Virology*, 48(1), 18

**Mario J Grijalva, Rosa F Chiriboga, Hans Vanhassel, Laura Arcos-Teran** (2005//). Improving the safety of the blood supply in Ecuador through external performance evaluation of serological screening of blood donors. *Journal of clinical virology : the official publication of the Pan American Society for Clinical Virology*, 34 Suppl 2(#issue#), S47

**Mifumi Kita, Matsuo Deguchi, Masanori Kagita, Nori Yoshioka, Eiji Kobayashi, Mikio Watanabe, Seishi Asari, Kiyoharu Yamanaka, Yoshinori Iwatani** (2009//). Clinical utility and characteristics of nine anti-HCV antibody screening reagents used in Japan. *Clinical laboratory*, 55(1-2), 9

**N Bouzgarrou, I Fodha, S Ben Othman, A Achour, F Grattard, A Trabelsi, B Pozzetto** (2005//). Evaluation of a total core antigen assay for the diagnosis of hepatitis C virus infection in hemodialysis patients. *Journal of medical virology*, 77(4), 502

**Nasreen Khan, Sali Aswad, Hamid Shidban, Mehbobeh Aghajani, Ralph Mendez, Robert Mendez, Lorraine Comanor** (2004//). Improved detection of HCV Infection in hemodialysis patients using a new HCV RNA qualitative assay: experience of a transplant center. *Journal of clinical virology : the official publication of the Pan American Society for Clinical Virology*, 30(2), 175

**Nouhoum Bouare, Dolores Vaira, Andre Gothot, Jean Delwaide, Sebastien Bontems, Laurence Seidel, Paul Gerard, Christiane Gerard** (2012//). Prevalence of HIV and HCV infections in two populations of Malian women and serological assays performances. *World journal of hepatology*, 4(12), 365

**Nubling C.M., Unger G., Chudy M., Raia S., Lower J.** (2002//). Sensitivity of HCV core antigen and HCV RNA detection in the early infection phase *Transfusion*, 42(8), 1037

**Odari E.O., Budambula N.L., Nitschko H.** (2014//). Evaluation of an antigen-antibody "combination" enzyme linked immunosorbent assay for diagnosis of hepatitis C virus infections *Ethiopian journal of health sciences*, 24(4), 343

**Oguchi H., Miyasaka M., Tokunaga S., Hora K., Ichikawa S., Ochi T., Yamada K., Nagasawa M., Kanno Y., Aizawa T., Watanabe H., Yoshizawa S., Sato K., Terashima M., Yoshie T., Oguchi S., Tanaka E., Kiyosawa K., Furuta S.** (1992//). Hepatitis virus infection (HBV and HCV) in eleven

Japanese hemodialysis units *Clinical Nephrology*, 38(1), 36

**Panigrahi A.K., Nayak B., Dixit R., Acharya S.K., Panda S.K.** (1998//). Evaluation of third generation anti-HCV enzyme immunoassays *Tropical gastroenterology : official journal of the Digestive Diseases Foundation*, 19(3), 105

**P Dentico, A Volpe, R Buongiorno, C Manno, S Carabellese, L Monno, G Pastore** (1995//). HCV third generation test in hemodialysis patients. *The Italian journal of gastroenterology*, 27(6), 300

**P Goubau, M Reynders, K Beuselinck, F Nevens, K Peerlinck, J Desmyter** (1997//). Confirmatory strategy of hepatitis C serology based on two screening assays in a diagnostic setting. *Acta clinica Belgica*, 52(1), 31

**P Leon, J A Lopez, C Domingo, J M Echevarria** (1993//). Evaluation of laboratory assays for screening antibody to hepatitis C virus. *Transfusion*, 33(3), 268

**Raghuraman S., Subramaniam T., Daniel D., Sridharan G., Abraham P.** (2003//). Occurrence of false positives during testing for antibodies to hepatitis C virus among volunteer blood donors in India *Journal of Clinical Microbiology*, 41(4), 1788

**Reesink H.W., van der Poel C.L., Cuypers H.T., Lelie P.N.** (1992//). HCV and blood transfusion *Archives of virology. Supplementum*, 4(#issue#), 241

**Rochlani M., Lewis J.H., Ramsey G.E., Bontempo F.A., Shah G., Bowman R.A., Van Thiel D.H., Starzl T.E.** (1992//). Hepatitis C testing: Comparison of Ortho's EIA and RIBA II tests in 1,182 patients undergoing primary liver transplantation *American Journal of Clinical Pathology*, 98(1), 8

**R Paolini, P Marson, M Vicarioto, G Ongaro, M Viero, A Girolami** (1994//). Anti-hepatitis C virus serology in patients affected with congenital coagulation defects: a comparative study using three second generation ELISA tests. *Transfusion science*, 15(3), 303

**R Soffredini, M Rumi, P Lampertico, A Aroldi, A Tarantino, C Ponticelli, M Colombo** (1996//). Increased detection of antibody to hepatitis C virus in renal transplant patients by third-generation assays. *American journal of kidney diseases : the official journal of the National Kidney Foundation*, 28(3), 437

**Recep Kesli, Hakki Polat, Yuksel Terzi, Muhammet Guzel Kurtoglu, Yavuz Uyar** (2011//). Comparison of a newly developed

automated and quantitative hepatitis C virus (HCV) core antigen test with the HCV RNA assay for clinical usefulness in confirming anti-HCV results. *Journal of clinical microbiology*, 49(12), 4089

**S Lee, J McHutchinson, B Francis, R DiNello, A Polito, S Quan, M Nelles** (1992//). Improved detection of antibodies to hepatitis C virus using a second generation ELISA. *Advances in experimental medicine and biology*, 312(#issue#), 183

**S Polywka, P Kaars-Wiele, E Schroeter, J Mandler, R Laufs** (1992//). Detection of antibodies to HCV: comparison of a c100-3 EIA and the 2nd generation EIA. *Beitrage zur Infusionstherapie = Contributions to infusion therapy*, 30(#issue#), 42

**S Uyttendaele, H Claeys, W Mertens, H Verhaert, C Vermeylen** (1994//). Evaluation of third-generation screening and confirmatory assays for HCV antibodies. *Vox sanguinis*, 66(2), 122

**Server Yagci, Elizaveta Padalko** (2012//). Comparison of monolisa HCV Ag/Ab ULTRA with two anti-HCV assays for the detection of HCV infection in hospital setting. *Current microbiology*, 64(2), 148

**Sinyoung Kim, Jeong-Ho Kim, Seoyoung Yoon, Youn-Hee Park, Hyon-Suk Kim** (2008//). Clinical performance evaluation of four automated chemiluminescence immunoassays for hepatitis C virus antibody detection. *Journal of clinical microbiology*, 46(12), 3919

**Tabler L.H., Tegtmeier G., Stramer S.L., Qnan S., Dockter J., Giachetti C., Busch M.P.** (2000//). Lookback on donors who are repeatedly reactive on first-generation hepatitis C virus assays: Justification and rational implementation *Transfusion*, 40(1), 15

**Vanhommerig J.W., van de Laar T.J., Koot M., van Rooijen M.S., Schinkel J., Speksnijder A.G., Prins M., de Vries H.J., Bruisten S.M.** (2015//). Evaluation of a hepatitis C virus (HCV) antigen assay for routine HCV screening among men who have sex with men infected with HIV *Journal of virological methods*, 213(#issue#), 147

**Vidales-Braz B.M., Da Silva N.M.O., Lobato R., Germano F.N., Da Mota L.D., Barros E.J.G., De Martinez A.M.B.** (2015//). Detection of hepatitis C virus in patients with terminal renal disease undergoing dialysis in southern Brazil: Prevalence, risk factors, genotypes, and viral load dynamics in hemodialysis patients *Virology Journal*, 12(1), no pagination

**V A dos Santos, R S Azevedo, M E Camargo, V A**



**Alves** (1999//). Serodiagnosis of hepatitis C virus. Effect of new evaluation of cutoff values for enzyme-linked immunosorbent assay in Brazilian patients. *American journal of clinical pathology*, 112(3), 418

**V Lakshmi, A K Reddy, K V Dakshinamurty** (2007//). Evaluation of commercially available third-generation anti-hepatitis C virus enzyme-linked immunosorbent assay in patients on haemodialysis. *Indian journal of medical microbiology*, 25(2), 140

**Vincenzo Bossi, Claudio Galli** (2004//). Quantitative signal of anti-HCV by an automated assay predicts viremia in a population at high prevalence of hepatitis C virus infection. *Journal of clinical virology : the official publication of the Pan American Society for Clinical Virology*, 30(1), 45

**W Prohaska, E Schroeter, P Kaars-Wiele, K Kleesiek** (1992//). Enzyme immunoassays for anti-hepatitis C virus antibodies improved specificity and analytical sensitivity by combination of three different recombinant viral proteins in second generation tests. *European journal of clinical chemistry and clinical biochemistry : journal of the Forum of European Clinical Chemistry Societies*, 30(7), 397

**Wafaa M El-Emshaty, Douaa Raafat, Doaa M Elghannam, Niveen Saady, Ehab E Eltoraby, Abd Elhameed A Metwalli** (2011//). Diagnostic Performance of an Immunoassay for Simultaneous Detection of Hcv Core Antigen and Antibodies among Haemodialysis Patients. *Brazilian journal of microbiology : [publication of the Brazilian Society for Microbiology]*, 42(1), 303

**Watson H.G., Ludlam C.A., Rebus S., Zhang L.Q., Peutherer J.F., Simmonds P.** (1992//). Use of several second generation serological assays to determine the true prevalence of hepatitis C virus infection in haemophiliacs treated with non-virus inactivated factor VIII and IX concentrates *British Journal of Haematology*, 80(4), 514

**Yoo S.J., Wang L.L., Ning H.-C., Tao C.M., Hirankarn N., Kuakarn S., Yang R., Han T.H., Chan R.C., Hussain B.M., Hussin H., Muliaty D., Shen L., Liu H., Wei L.** (2015//). Evaluation of the Elecsys() Anti-HCV II assay for routine hepatitis C virus screening of different Asian Pacific populations and detection of early infection *Journal of clinical virology : the official publication of the Pan American Society for Clinical Virology*, 64(#issue#), 20

#### **4. Is the (screening) INDEX TEST one of the following?**

**A Giulivi, M T Aye, E Gray, V Scalia, P Gill, G Cheng** (1992//). Anti-hepatitis C virus (HCV) screening at a Canadian Red Cross center: significance of a positive c100 HCV enzyme-linked immunosorbent assay. *Transfusion*, 32(4), 309

**A Palacios, L Taylor, L Haue, R B Luftig, K A Visona** (1999//). Development of low cost peptide-based anti-hepatitis C virus screening and confirmatory assays: comparison with commercially available tests. *Journal of medical virology*, 58(3), 221

**A Sato, N Ida, M Ishikawa, K Tanahashi, H Nakamura, Y Sho, T Arima, T Kunitomo** (1993//). A sensitive serodiagnosis of hepatitis C virus (HCV) infection with two non-fused peptides: comparison of antibody responses detected with a newly developed assay and a commercial second-generation test. *Microbiology and immunology*, 37(4), 295

**Bludau H., Thome-Kromer B., Braun H.B., Gultekin H., Knoller B., Borelli G., Scudeller G., Galli C.** (1995//). Evaluation of a fully automated IMx HCV assay for the detection of antibody to hepatitis C virus *Klinisches Labor*, 41(10), 777

**B C Dow, I Coote, H Munro, F McOmish, P L Yap, P Simmonds, E A Follett** (1993//). Confirmation of hepatitis C virus antibody in blood donors. *Journal of medical virology*, 41(3), 215

**D Mvere, N T Constantine, E Katsawde, O Tobaiwa, S Dambire, P Corcoran** (1996//). Rapid and simple hepatitis assays: encouraging results from a blood donor population in Zimbabwe. *Bulletin of the World Health Organization*, 74(1), 19

**G J Dawson, R R Lesniewski, J L Stewart, K M Boardway, R A Gutierrez, L Pendy, R G Johnson, X Alcalde, K V Rote, S G Devare** (1991//). Detection of antibodies to hepatitis C virus in U.S. blood donors. *Journal of clinical microbiology*, 29(3), 551

**Gessoni G., Manoni F., Dolci L., Valverde S., Antico F., Piacentini I.** (1997//). Relevance of anti-HCV antibody (IgG and IgM) and HCV-RNA in diagnosis of HCV infection *Alpe Adria Microbiology Journal*, 6(1-2), 35

**H Vrieling, H W Reesink, P J van den Burg, H L Zaaijer, H T Cuypers, P N Lelie, C L van der Poel** (1997//). Performance of three generations of anti-hepatitis C virus enzyme-linked immunosorbent assays in donors and patients. *Transfusion*, 37(8), 845

- H Y Zhang, I K Kuramoto, D Mamish, K Sazama, P V Holland, J B Zeldis** (1993//). Hepatitis C virus in blood samples from volunteer donors. *Journal of clinical microbiology*, 31(3), 606
- Janot C., Courouze A.M., Boudart D., Cotte C., Elghouzzi M.H., Jullien A.M., Lemaire J.M., Maisonneuve P., Maniez-Montreuil M., Mattlinger B.** (1992//). Analytical study of the Abbott and Ortho tests for screening and confirmation of anti-HCV antibodies. Le groupe de Travail "Hepatitis virales" de la Societe Francaise de Transfusion Sanguine *Revue francaise de transfusion et d'hemobiologie : bulletin de la Societe nationale de transfusion sanguine*, 35(3), 171
- Jha J., Arankalle V.A., Banerjee K.** (1995//). Hepatitis C virus RNA positivity among RIBA-3 indeterminates *Vox sanguinis*, 69(2), 145
- J C Sheu, J T Wang, T H Wang, C Y Wang, P M Yang, G T Huang, L N Shih, H S Lee, D S Chen** (1993//). Prevalence of hepatitis C viral infection in a community in Taiwan. Detection by synthetic peptide-based assay and polymerase chain reaction. *Journal of hepatology*, 17(2), 192
- J D Callahan, N T Constantine, P Kataaha, X Zhang, K C Hyams, J Bansal** (1993//). Second generation hepatitis C virus assays: performance when testing African sera. *Journal of medical virology*, 41(1), 35
- J G McHutchison, J L Person, S Govindarajan, B Valinluck, T Gore, S R Lee, M Nelles, A Polito, D Chien, R DiNello** (1992//). Improved detection of hepatitis C virus antibodies in high-risk populations. *Hepatology (Baltimore, Md.)*, 15(1), 19
- Jung-Ah Kwon, Hyeseon Lee, Kap No Lee, Kwangchun Chae, Seram Lee, Dong-Ki Lee, Soyoun Kim** (2008//). High diagnostic accuracy of antigen microarray for sensitive detection of hepatitis C virus infection. *Clinical chemistry*, 54(2), 424
- Kolho E.** (1992//). Specificity and sensitivity of first and second generation anti-HCV ELISA in a low prevalence population *Transfusion medicine (Oxford, England)*, 2(3), 239
- Kolho E., Naukkarinen R., Krusius T.** (1994//). Specificity and sensitivity of two second-generation enzyme-linked immunosorbent assays for antibodies to hepatitis C virus in blood donor screening *Transfusion*, 34(1), 85
- K L MacDonald, W A Mills, R C Wood, M Hanson, W Kline, R J Bowman, H F Polesky, A E Williams, M T Osterholm** (1994//). Evaluation of clinical and laboratory aspects of antibody tests for detection of hepatitis C virus infection in blood donors and recipients from a low-risk population. *Transfusion*, 34(3), 202
- Polito A.J., DiNello R.K., Quan S., Andrews W., Rose J., Lee F., Nelles M., Lee S.** (1992//). New-generation RIBA hepatitis C strip immunoblot assays *Beitrag zur Infusionstherapie = Contributions to infusion therapy*, 30(issue#), 17
- M Bonaguidi-Magniaux, C Pilette, F Oberti, M L Bidet, P Cales** (1996//). [Follow-up of blood donors with positive serology for hepatitis C virus and their recipients is insufficient]. *Gastroenterologie clinique et biologique*, 20(8-9), 663
- M H Sayers, D R Gretch** (1993//). Recombinant immunoblot and polymerase chain reaction testing in volunteer whole blood donors screened by a multi-antigen assay for hepatitis C virus antibodies. *Transfusion*, 33(10), 809
- N Yuki, N Hayashi, T Kamada** (1993//). Detection of HCV infection with second-generation assays. *Lancet (London, England)*, 341(8854), 1216
- R K Chaudhary, C Maclean** (1993//). Detection of antibody to hepatitis C virus by second-generation enzyme immunoassay. *American journal of clinical pathology*, 99(6), 702
- S C Anderson, T Hathaway, I K Kuramoto, P V Holland, R Gilcher, T Koch, S Hojvat** (1995//). Comparison of two second-generation anti-hepatitis C virus ELISA on 21431 US blood donor samples. *Journal of viral hepatitis*, 2(1), 55
- S K Aoki, I K Kuramoto, S Anderson, V Schoening, R Rodriguez, L Fernando, K Sazama, P V Holland** (1994//). Evidence that use of a second-generation hepatitis C antibody assay prevents additional cases of transfusion-transmitted hepatitis. *Journal of viral hepatitis*, 1(1), 73
- S Kleinman, H Alter, M Busch, P Holland, G Tegtmeier, M Nelles, S Lee, E Page, J Wilber, A Polito** (1992//). Increased detection of hepatitis C virus (HCV)-infected blood donors by a multiple-antigen HCV enzyme immunoassay. *Transfusion*, 32(9), 805
- S R Lee, C L Wood, M J Lane, B Francis, C Gust, C M Higgs, M J Nelles, A Polito, R DiNello, D Achord** (1995//). Increased detection of hepatitis C virus infection in commercial plasma donors by a third-generation screening assay. *Transfusion*, 35(10), 845
- T J Tucker, M Voigt, A Bird, S Robson, B Gibbs, J**

**Kannemeyer, M Galloway, R E Kirsch, H Smuts** (1997//). Hepatitis C virus infection rate in volunteer blood donors from the Western Cape-- comparison of screening tests and PCR. *South African medical journal = Suid-Afrikaanse tydskrif vir geneeskunde*, 87(5), 603

**T Kodama, S Ichiyama, K Sato, T Nada, N Nakashima** (1998//). Evaluation of a membrane filter assay system, Ortho HCV Ab Quick Pack, for detection of anti-hepatitis C virus antibody. *Journal of clinical microbiology*, 36(5), 1439

**T Tanaka, J Y Lau, M Mizokami, E Orito, E Tanaka, K Kiyosawa, K Yasui, Y Ohta, A Hasegawa, S Tanaka** (1995//). Simple fluorescent enzyme immunoassay for detection and quantification of hepatitis C viremia. *Journal of hepatology*, 23(6), 742

**Y Lazizi** (1994//). Discordance between four second-generation enzyme immunoassay kits in anti-hepatitis C virus screening. The Study Group of the Laboratoires de Virologie des Centres Hospitaliers Universitaires francais. *European journal of clinical microbiology & infectious diseases : official publication of the European Society of Clinical Microbiology*, 13(3), 280

**Weise W., Backer U., Seidl S., Flacke H., Sondag D., Pirenne H., Schroeter E., Troonen H., Broeksma C., Heyermann H.** (1992//). Abbott HCV EIA 2nd generation: a new screening assay *Beitrag zur Infusionstherapie = Contributions to infusion therapy*, 30(#issue#), 34

## **5. Is the (comparator) REFERENCE TEST one of the following?**

**Nahed Ismail, Geoffrey E Fish, Michael B Smith** (2004//). Laboratory evaluation of a fully automated chemiluminescence immunoassay for rapid detection of HBsAg, antibodies to HBsAg, and antibodies to hepatitis C virus. *Journal of clinical microbiology*, 42(2), 610

## **6. Does the study report on the following OUTCOMES? (Tick all that apply)**

## **7. Is the SETTING representative of primary care?**

**Pierre Zachary, Murielle Ullmann, Saadi Djeddi, Nicolas Meyer, Marie-Josée Wendling, Evelyne Schvoerer, Françoise Stoll-Keller, Jean-Pierre Gut** (2005//). Evaluation of three commercially

available hepatitis C virus antibody detection assays under the conditions of a clinical virology laboratory. *Journal of clinical virology : the official publication of the Pan American Society for Clinical Virology*, 34(3), 207

## **8. Does the study take place in a country with a LOW OR MODERATE (<3.5%) PREVALENCE of chronic HCV infection?**

### **Level 2: Full Text Review**

#### **1. Is the full-text article available for review?**

#### **2. What language is this article written in?**

**Ecemis T., Akcali S., Erbay Dundar P., Sanlidag T.** (2012//). The threshold value of anti-HCV test in the diagnosis of HCV infection *Turkiye Klinikleri Journal of Medical Sciences*, 32(6), 1648

**Suslov A.P., Kuzin S.N., Golosova T.V., Shalunova N.V., Malyshev N.A., Sadikova N.V., Vavilova L.M., Somova A.V., Musina E.E., Ivanova M.V., Kipor T.T., Timonin I.M., Kuzina L.E., Godkov M.A., Bajenov A.I., Nesterenko V.G.** (2002//). Limits of diagnostic accuracy of anti-hepatitis C virus antibodies detection by ELISA and immunoblot assay *Russian journal of immunology : RJI : official journal of Russian Society of Immunology*, 7(2), 175

#### **3. Is it or does it include an original validation study of a blood-based qualitative immunoassay for hepatitis C?**

**Kaur H., Manjari M., Thaman R.G., Singh G.** (2012//). Prevalence of markers of Hepatitis C virus among the blood donors *Journal of Clinical and Diagnostic Research*, 6(6), 959

#### **4. What TYPE OF PUBLICATION is it?**

#### **5. Is the STUDY POPULATION comprised of asymptomatic, non-pregnant adults (aged 18+ years) with unknown HCV status and**

## unknown liver enzyme values, and at average risk of HCV infection?

**A D Kitchen, N V Tucker** (1995//). The specificity of anti-HCV supplementary assays. *Vox sanguinis*, 69(2), 100

**Annemarie Berger, Holger Rabenau, Regina Allwinn, Hans Wilhelm Doerr** (2008//). Evaluation of the new ARCHITECT anti-HCV screening test under routine laboratory conditions. *Journal of clinical virology : the official publication of the Pan American Society for Clinical Virology*, 43(2), 158

**B Seignerres, F Descamps, R Croise, V Barlet, M Bouvier-Alias, S Chevaliez, J M Pawlotsky, W Abdelhady, M Rafik, A M Avellon, J M Echevarria, M Hausmann, J-M Dugua** (2016//). Multicenter clinical evaluation of the new 3rd generation assay for detection of antibodies against hepatitis C virus on the VIDAS() system. *Journal of clinical virology : the official publication of the Pan American Society for Clinical Virology*, 78(issue#), 20

**Benjamin Maasoumy, Birgit Bremer, Regina Raupach, Patrick Lehmann, Michael P Manns, Markus Cornberg, Heiner Wedemeyer** (2014//). How to interpret borderline HCV antibody test results: a comparative study investigating four different anti-HCV assays. *Viral immunology*, 27(1), 7

**C Berasain, M Garcia-Granero, J I Riezu-Boj, M P Civeira, J Prieto, F Borrás-Cuesta** (1993//). Detection of anti-hepatitis C virus antibodies by ELISA using synthetic peptides. *Journal of hepatology*, 18(1), 80

**C Colin, D Lanoir, S Touzet, L Meyaud-Kraemer, F Bailly, C Trepo, HEPATITIS Group** (2001//). Sensitivity and specificity of third-generation hepatitis C virus antibody detection assays: an analysis of the literature. *Journal of viral hepatitis*, 8(2), 87

**D Lavanchy, C Mayerat, B Morel, P Schneider, C Zufferey, J J Gonvers, A Pecoud, P C Frei** (1994//). Evaluation of third-generation assays for detection of anti-hepatitis C virus (HCV) antibodies and comparison with presence of HCV RNA in blood donors reactive to c100-3 antigen. *Journal of clinical microbiology*, 32(9), 2272

**D Lavanchy, J Steinmann, A Moritz, P C Frei** (1996//). Evaluation of a new automated third-generation anti-HCV enzyme immunoassay. *Journal of clinical laboratory analysis*, 10(5), 269

**D Robert Dufour, Mageli Talastas, Maria D A Fernandez, Barbara Harris** (2003//). Chemiluminescence assay improves specificity of hepatitis C antibody detection. *Clinical chemistry*, 49(6 Pt 1), 940

**Dinesh O Shah, Chi D Chang, Lily X Jiang, Kevin Y Cheng, A Scott Muerhoff, Robin A Gutierrez, Thomas P Leary, Suresh M Desai, Irene V Batac-Herman, Vince A Salbilla, Alla S Haller, James L Stewart, George J Dawson** (2003//). Combination HCV core antigen and antibody assay on a fully automated chemiluminescence analyzer. *Transfusion*, 43(8), 1067

**Elliot Eli Dogbe, Fareed Arthur** (2015//). Diagnostic accuracy of blood centers in the screening of blood donors for viral markers. *The Pan African medical journal*, 20(issue#), 119

**F Ansaldi, B Bruzzone, G Testino, M Bassetti, R Gasparini, P Crovari, G Icardi** (2006//). Combination hepatitis C virus antigen and antibody immunoassay as a new tool for early diagnosis of infection. *Journal of viral hepatitis*, 13(1), 5

**F Ferrer, M J Candela, C Garcia, L Martinez, J Rivera, V Vicente** (1997//). A comparative study of two third-generation anti-hepatitis C virus ELISAs. *Haematologica*, 82(6), 690

**F Hmaied, M Ben Mamou, Z Arrouji, A Slim, S Ben Redjeb** (2007//). [Use of combined detection of hepatitis C virus core antigen and antibodies to reduce the serological window-phase]. *Pathologie-biologie*, 55(2), 121

**G Icardi, F Ansaldi, B M Bruzzone, P Durando, S Lee, C de Luigi, P Crovari** (2001//). Novel approach to reduce the hepatitis C virus (HCV) window period: clinical evaluation of a new enzyme-linked immunosorbent assay for HCV core antigen. *Journal of clinical microbiology*, 39(9), 3110

**H Cano, M J Candela, M L Lozano, V Vicente** (2003//). Application of a new enzyme-linked immunosorbent assay for detection of total hepatitis C virus core antigen in blood donors. *Transfusion medicine (Oxford, England)*, 13(5), 259

**H Hennig, P Schlenke, H Kirchner, I Bauer, B Schulte-Kellinghaus, H Bludau** (2000//). Evaluation of newly developed microparticle enzyme immunoassays for the detection of HCV antibodies. *Journal of virological methods*, 84(2), 181

**H Vrieling, H L Zaaijer, H W Reesink, C L van der Poel, H T Cuypers, P N Lelie** (1995//). Sensitivity and specificity of three third-generation anti-

hepatitis C virus ELISAs. *Vox sanguinis*, 69(1), 14

**K Aoyagi, C Ohue, K Iida, T Kimura, E Tanaka, K Kiyosawa, S Yagi** (1999//). Development of a simple and highly sensitive enzyme immunoassay for hepatitis C virus core antigen. *Journal of clinical microbiology*, 37(6), 1802

**L H Tobler, S R Lee, S L Stramer, J Peterson, R Kochesky, K Watanabe, S Quan, A Polito, M P Busch** (2000//). Performance of second- and third-generation RIBAs for confirmation of third-generation HCV EIA-reactive blood donations. Retrovirus Epidemiology Donor Study. *Transfusion*, 40(8), 917

**M Tsopanomichalou, M Ergazaki, D A Spandidos** (1997//). Evaluation of western blot in routine diagnosis of hepatitis C virus. *The International journal of biological markers*, 12(1), 35

**M da Silva Cardoso, K Koerner, S Epple, B Kubanek** (1993//). Prevalence of HCV-RNA-positive blood donors and correlation to ELISA and RIBA status. *Annals of hematology*, 66(3), 147

**M Schroter, H H Feucht, P Schafer, B Zollner, S Polywka, R Laufs** (1999//). Definition of false-positive reactions in screening for hepatitis C virus antibodies. *Journal of clinical microbiology*, 37(1), 233

**Menha Swellam, Magda Sayed Mahmoud, Adel Abdel-Fatah Ali** (2011//). Diagnosis of hepatitis C virus infection by enzyme-linked immunosorbent assay and reverse transcriptase-nested polymerase chain reaction: a comparative evaluation. *IUBMB life*, 63(6), 430

**Mohsan Saeed, Ryosuke Suzuki, Madoka Kondo, Hideki Aizaki, Takanobu Kato, Toshiaki Mizuochi, Takaji Wakita, Haruo Watanabe, Tetsuro Suzuki** (2009//). Evaluation of hepatitis C virus core antigen assays in detecting recombinant viral antigens of various genotypes. *Journal of clinical microbiology*, 47(12), 4141

**Par A., Kantor I., Barcsay E., Hollos I., Mezey I., Brojnas J., Takacs M., Hejjas M., Illes M., Szontagh L.** (1991//). Prevalence of antibody to hepatitis C virus in blood donors, high-risk groups and patients with liver diseases in Hungary. A multicentre study using ABBOTT EIA test and a comparison with an ORTHO ELISA test system *Acta medica Hungarica*, 48(3-4), 167

**P Bonanni, G C Icardi, A M Raffo, M Ferrari Bravo, A Roccatagliata, P Crovari** (1996//). Analytical and laboratory evaluation of a new fully-automated third generation enzyme immunoassay for the detection of antibodies to the hepatitis C

virus. *Journal of virological methods*, 62(2), 113

**P Kiely, D Wilson** (2000//). Results of HCV screening of volunteer blood donors with a chemiluminescent immunoassay and a second- or third-generation EIA: overlap of false-positive reactivity and its impact on donor management. *Transfusion*, 40(5), 580

**P Vermeersch, M Van Ranst, K Lagrou** (2010//). Evaluation of the use of a combined HCV antigen/antibody assay in routine laboratory practice. *Acta clinica Belgica*, 65(4), 245

**Philip Kiely, Kyall Walker, Susan Parker, Anthea Cheng** (2010//). Analysis of sample-to-cutoff ratios on chemiluminescent immunoassays used for blood donor screening highlights the need for serologic confirmatory testing. *Transfusion*, 50(6), 1344

**Pierpaolo Valcavi, Maria Cristina Medici, Francesca Casula, Maria Cristina Arcangeletti, Flora De Conto, Federica Pinardi, Adriana Calderaro, Carlo Chezzi, Giuseppe Dettori** (2004//). Evaluation of a total hepatitis C virus (HCV) core antigen assay for the detection of antigenaemia in anti-HCV positive individuals. *Journal of medical virology*, 73(3), 397

**S K Dhaliwal, L E Prescott, B C Dow, F Davidson, H Brown, P L Yap, E A Follett, P Simmonds** (1996//). Influence of viraemia and genotype upon serological reactivity in screening assays for antibody to hepatitis C virus. *Journal of medical virology*, 48(2), 184

**S R Lee, J Peterson, P Niven, C Bahl, E Page, R DeLeys, D Giordano-Schmidt, D Baggett, G Green** (2001//). Efficacy of a hepatitis C virus core antigen enzyme-linked immunosorbent assay for the identification of 'window-phase' blood donations. *Vox sanguinis*, 80(1), 19

**Son H.C., Yoon M.S., Kim Y.J., Kim I.H., Kim Y.S.** (2002//). Type-specific antibody for hepatitis C virus detected by use of NS-4 peptide and hepatitis C virus genome in Korea *Rinsho byori. The Japanese journal of clinical pathology*, 50(5), 533

**Susan L Stramer, Roger Y Dodd, Jaye P Brodsky** (2013//). The value of screening signal-to-cutoff ratios for hepatitis C virus antibody confirmation. *Transfusion*, 53(7), 1497

**T P Leary, R A Gutierrez, A S Muerhoff, L G Birkenmeyer, S M Desai, G J Dawson** (2006//). A chemiluminescent, magnetic particle-based immunoassay for the detection of hepatitis C virus core antigen in human serum or plasma. *Journal of*

**Dow B.C., Follett E.A.C., Munro H., Buchanan I., Roy K., McOmish F., Yap P.L., Simmonds P.** (1994//). Failure of 2nd- and 3rd-generation HCV ELISA and RIBA to detect HCV polymerase chain reaction - Positive donations [2] *Vox Sanguinis*, 67(2), 236

**Hofmann H., Konczer A.** (1993//). Commercial test kits in diagnosis of hepatitis C *Serodiagnosis and Immunotherapy in Infectious Disease*, 5(2), 76

**Mixson-Hayden T., Dawson G.J., Teshale E., Le T., Cheng K., Drobeniuc J., Ward J., Kamili S.** (2015//). Performance of ARCHITECT HCV core antigen test with specimens from US plasma donors and injecting drug users *Journal of clinical virology : the official publication of the Pan American Society for Clinical Virology*, 66(#issue#), 15

**Muerhoff A.S., Jiang L., Shah D.O., Gutierrez R.A., Patel J., Garolis C., Kyrk C.R., Leckie G., Frank A., Stewart J.L., Dawson G.J.** (2002//). Detection of HCV core antigen in human serum and plasma with an automated chemiluminescent immunoassay *Transfusion*, 42(3), 349

**Oh E.-J., Chang J., Yang J.-Y., Kim Y., Park Y.-J., Han K.** (2013//). Different signal-to-cut-off ratios from three automated anti-hepatitis C virus chemiluminescence immunoassays in relation to results of recombinant immunoblot assays and nucleic acid testing *Blood Transfusion*, 11(3), 471

**Re V., Gallego S., Trevino E., Barbas G., Dominguez C., Elbarcha O., Bepre H., Contigiani M.** (2005//). Evaluation of five screening tests licensed in Argentina for detection of hepatitis C virus antibodies *Memorias do Instituto Oswaldo Cruz*, 100(3), 303

**Shirachi M., Sata M., Suzuki H., Fukuizumi K., Tanikawa K., Itoh Y., Mizumoto T., Kondoh S., Kasahara M., Manabe S.** (1998//). Evaluation of third generation anti-HCV test kit (SYNPEP HCV-EIA II) using sera of inhabitants from HCV hyperendemic area *The Kurume medical journal*, 45(1), 81

**Uyttendaele S., Claeys H., Mertens W., Verhuert H., Vermeylen C.** (1994//). Evaluation of third-generation screening and confirmatory assays for HCV antibodies *Vox Sanguinis*, 66(2), 122

## **6. Is the (screening) INDEX TEST one of the following commercially-available immunoassays?**

**Alter H.J., Tegtmeier G.E., Jett B.W., Quan S., Shih J.W., Bayer W.L., Polito A.** (1991//). The use of a recombinant immunoblot assay in the interpretation of anti-hepatitis C virus reactivity among prospectively followed patients, implicated donors, and random donors *Transfusion*, 31(8), 771

**B Betlach, S Anderson, R Rodriguez, K Kuramoto, K Sazama, P V Holland** (1992//). Comparison of two approved enzyme immunoassays for the detection of antibodies to the hepatitis C virus in 5216 United States blood donors. *Transfusion*, 32(2), 191

**Diallo A., Lazizi Y., Le Guenno B., Pillot J.** (1991//). Non-specific reactions of the ELISA kit for the detection of blood donors infected with hepatitis C virus *Presse Medicale*, 20(8), 383

**C J Tibbs, S J Palmer, R Coker, S K Clark, G M Parsons, S Hojvat, D Peterson, J E Banatvala** (1991//). Prevalence of hepatitis C in tropical communities: the importance of confirmatory assays. *Journal of medical virology*, 34(3), 143

**Galel S.A., Strong D.M., Tegtmeier G.E., Holland P.V., Kuramoto I.K., Kemper M., Pietrelli L., Gallarda J.** (2002//). Comparative yield of HCV RNA testing in blood donors screened by 2.0 versus 3.0 antibody assays *Transfusion*, 42(11), 1507

**J P Allain, A Kitchen, S Aloysius, I Reeves, J Petrik, J A Barbara, L M Williamson** (1996//). Safety and efficacy of hepatitis C virus antibody screening of blood donors with two sequential screening assays. *Transfusion*, 36(5), 401  
**Ornopia G.L., Kuramoto K.** (1995//). Detection of anti-hepatitis C virus using chemiluminescence *Journal of Viral Hepatitis*, 2(4), 215

**W Prohaska, C Wolff, E Lechler, K Kleesiek** (1991//). High rate of false positives in blood donor screening for antibodies to hepatitis C virus. Cause of underestimation of virus transmission rate?. *Klinische Wochenschrift*, 69(7), 294

## **7. STUDY DESIGN: was the REFERENCE TEST applied to both: 1) subjects who tested NEGATIVE on the INDEX TEST, AND 2) subjects who tested POSITIVE on the INDEX TEST?**

**Ali Acar, Sabri Kemahli, Husnu Altunay, Erdogan Kosan, Oral Oncul, Levent Gorenek, Saban Cavuslu** (2010//). The significance of repeat testing in Turkish blood donors screened with HBV, HCV and HIV immunoassays and the importance of S/CO ratios in the interpretation of

HCV/HIV screening test results and as a determinant for further confirmatory testing. *Transfusion medicine (Oxford, England)*, 20(3), 152

**Bruhn R., Lelie N., Busch M., Kleinman S., Vermeulen M., Reddy R., Bird A., Cable R., Goubran H., Mofthah F., El Ekiaby M., Ghiazza P., Manzini P., Favilli F., Peduzzi C., Roig R., Alvarez M., Sauleda S., Niederhauser C., Levicnik S., Nograski P., Wessberg S., Elkblom S., Lankinen M., Ulm H., Harritshoj L., Nielsen C., Jorgensen S., Erikstrup C., O'Riordan J., Brojer E., Grabarczyk P., Gdowska J., Piotrowski D., Lam S., Teo D., Chua S.S., Lin C.K., Tsoi W.C., Bon A.H., Peng S.L.T., Flanagan P., Brown S., Kiely P., Margaritis A.** (2015//). Relative efficacy of nucleic acid amplification testing and serologic screening in preventing hepatitis C virus transmission risk in seven international regions *Transfusion*, 55(6), 1195

**Clive R Seed, Angelo R Margaritis, Wayne V Bolton, Philip Kiely, Susan Parker, Lisa Piscitelli, Australian Red Cross Blood Service Virology Subcommittee of the National Donor and Product Safety Committee** (2003//). Improved efficiency of national HIV, HCV, and HTLV antibody testing algorithms based on sequential screening immunoassays. *Transfusion*, 43(2), 226

**F Alborino, A Burighel, F-W Tiller, J van Helden, C Gabriel, A Raineri, R Catapano, H Stekel** (2011//). Multicenter evaluation of a fully automated third-generation anti-HCV antibody screening test with excellent sensitivity and specificity. *Medical microbiology and immunology*, 200(2), 77

**Gesa Jonas, Claudia Pelzer, Christian Beckert, Michael Hausmann, Hans-Peter Kapprell** (2005//). Performance characteristics of the ARCHITECT anti-HCV assay. *Journal of clinical virology : the official publication of the Pan American Society for Clinical Virology*, 34(2), 97

**J Petitjean Lecherbonnier, S Gouarin, J Dina, A Vabret, F Freymuth** (2007//). [Hepatitis C virus screening: performances characteristics of a commercial automated chemiluminescent microparticle immunoassay (CMIA-ARCHITECT anti-HCV)]. *Pathologie-biologie*, 55(10), 512

**Lei Li, Pei-Jer Chen, Ming-Hung Chen, Kin-Fu Chak, Kuo-Sin Lin, Su-Jen Lin Tsai** (2008//). A pilot study for screening blood donors in Taiwan by nucleic acid amplification technology: detecting occult hepatitis B virus infections and closing the serologic window period for hepatitis C virus. *Transfusion*, 48(6), 1198

**Linda Sommese, Carmela Iannone, Francesco Cacciatore, Gustavo De Iorio, Claudio Napoli** (2014//). Comparison between screening and confirmatory serological assays in blood donors in a region of South Italy. *Journal of clinical laboratory analysis*, 28(3), 198

**Mohamed Abdel-Hamid, Mai El-Daly, Sherif El-Kafrawy, Nabil Mikhail, G Thomas Strickland, Alan D Fix** (2002//). Comparison of second- and third-generation enzyme immunoassays for detecting antibodies to hepatitis C virus. *Journal of clinical microbiology*, 40(5), 1656

**P Zachary, M Ullmann, S Djeddi, M-J Wendling, E Schvoerer, F Stoll-Keller, J-P Gut** (2004//). [Evaluation of two commercial enzyme immunoassays for diagnosis of hepatitis C in the conditions of a virology laboratory]. *Pathologie-biologie*, 52(9), 511

**Pieter Vermeersch, Marc Van Ranst, Katrien Lagrou** (2008//). Validation of a strategy for HCV antibody testing with two enzyme immunoassays in a routine clinical laboratory. *Journal of clinical virology : the official publication of the Pan American Society for Clinical Virology*, 42(4), 394

**Recep Kesli, M Ozdemir, M G Kurtoglu, M Baykan, B Baysal** (2009//). Evaluation and comparison of three different anti-hepatitis C virus antibody tests based on chemiluminescence and enzyme-linked immunosorbent assay methods used in the diagnosis of hepatitis C infections in Turkey. *The Journal of international medical research*, 37(5), 1420

**Ruifeng Yang, Wenli Guan, Qian Wang, Yan Liu, Lai Wei** (2013//). Performance evaluation and comparison of the newly developed Elecsys anti-HCV II assay with other widely used assays. *Clinica chimica acta; international journal of clinical chemistry*, 426(#issue#), 95

**Steven H Kleinman, Susan L Stramer, Jaye P Brodsky, Sally Caglioti, Michael P Busch** (2006//). Integration of nucleic acid amplification test results into hepatitis C virus supplemental serologic testing algorithms: implications for donor counseling and revision of existing algorithms. *Transfusion*, 46(5), 695

**Yuan-Hung Kuo, Kuo-Chin Chang, Jing-Houng Wang, Pei-Shan Tsai, Shu-Feng Hung, Chao-Hung Hung, Chien-Hung Chen, Sheng-Nan Lu** (2012//). Is hepatitis C virus core antigen an adequate marker for community screening?. *Journal of clinical microbiology*, 50(6), 1989

**8. Is the (comparator) REFERENCE TEST one of the following commercially-available assays?**

O'Flynn N., Jilg W., McQuillan T., Bauer I., Heyermann M., Schulte-Kellinghaus B., Moller D. (1997//). New HCV assay on the Abbott AxSYM random access analyzer *Clinical Laboratory*, 43(5), 403

**9. Does the study report on the following OUTCOMES?**

M Schmidt, A Jimenez, A Muhlbacher, S Oota, L Blanco, T Sakuldamrongpanich, H Schennach, E Seifried (2015//). Head-to-head comparison between two screening systems for HBsAG, anti-HBc, anti-HCV and HIV combination immunoassays in an international, multicentre evaluation study. *Vox sanguinis*, 109(2), 114

**10. Is the SETTING representative of primary care?**

**11. Does the study take place in a country with a LOW OR MODERATE (<3.5%) PREVALENCE of chronic HCV infection?**
